# Supplementary material for: Lessons learnt in photocatalysis – the influence of solvent polarity and the photostability of the photocatalyst
Source: Royal Society of Chemistry journal article supplement (doi:10.1039/d3sc06499a), 2024-01-01
Supplement: d3sc06499a1.pdf [file d3sc06499a1.pdf]

## Supporting Information

# Lessons Learnt in Photocatalysis - the Influence of Solvent Polarity and the Photostability of the Photocatalyst

Megan Amy Bryden,<sup>a</sup> Francis Millward,<sup>a</sup> Oliver S. Lee,<sup>a</sup> Lauren Cork,<sup>a</sup> Malte C.  
Gather,<sup>b</sup> Andreas Steffen<sup>c</sup> and Eli Zysman-Colman<sup>a\*</sup>

<sup>a</sup>Organic Semiconductor Centre, EaStCHEM School of Chemistry, University of St  
Andrews, St Andrews, Fife, U.K., KY16 9ST, Fax: +44-1334 463808; Tel: +44-1334  
463826;

E-mail: [eli.zysman-colman@st-andrews.ac.uk](mailto:eli.zysman-colman@st-andrews.ac.uk);

URL: <http://www.zysman-colman.com>

<sup>b</sup>Humboldt Centre for Nano- and Biophotonics, Department of Chemistry, University of  
Cologne, Greinstr. 4-6, 50939 Cologne, Germany

<sup>c</sup>Technische Universität Dortmund, Fakultät für Chemie und Chemische Biologie,  
Anorganische Chemie, Otto-Hahn-Str., 644227, Dortmund, Germany.

## Table of Contents

|                                                           |      |
|-----------------------------------------------------------|------|
| <b>Experimental Section</b> .....                         | S3   |
| <b>DFT calculations</b> .....                             | S7   |
| <b>Electrochemistry</b> .....                             | S24  |
| <b>UV-Vis absorption spectra</b> .....                    | S35  |
| <b>Steady-state emission spectra</b> .....                | S45  |
| <b>Optical gap determination</b> .....                    | S54  |
| <b>RT steady-state PL and 77 K emission spectra</b> ..... | S64  |
| <b>Time resolved emission spectra</b> .....               | S68  |
| <b>Stern-Volmer quenching studies</b> .....               | S75  |
| <b>Photostability studies</b> .....                       | S83  |
| <b>Photocatalysis</b> .....                               | S106 |
| <b>NMR spectra</b> .....                                  | S113 |
| <b>References</b> .....                                   | S114 |

## Experimental Section

*General Synthetic Procedures.* The following starting materials were synthesised according to literature procedures: **[Ru(bpy)<sub>3</sub>](PF<sub>6</sub>)<sub>2</sub>**,<sup>1</sup> **[Ir(ppy)<sub>2</sub>(dtbbpy)]PF<sub>6</sub>**,<sup>2</sup> **[Ir(dF(CF<sub>3</sub>)ppy)<sub>2</sub>(dtbbpy)]PF<sub>6</sub>**,<sup>3</sup> **[Cu(dmp)(xantphos)]PF<sub>6</sub>**,<sup>4</sup> **4CzIPN**,<sup>5</sup> **2CzPN**,<sup>6</sup> **pDTCz-DPmS**<sup>7</sup> and *N*-Cbz-Pro.<sup>8</sup> All other reagents and solvents were obtained from commercial sources and used as received. Air-sensitive reactions were performed under a nitrogen atmosphere using Schlenk techniques, no special precautions were taken to exclude air or moisture during work-up and crystallisation. Anhydrous THF, DCM and acetonitrile were obtained from a MBraun SPS5 solvent purification system. Flash column chromatography was carried out using silica gel (Silia-P from Silicycle, 60 Å, 40-63 µm). Analytical thin-layer-chromatography (TLC) was performed with silica plates with aluminum backings (250 µm with F-254 indicator). TLC visualization was accomplished by 254/365 nm UV lamp. <sup>1</sup>H and <sup>19</sup>F NMR spectra were recorded on a Bruker Advance spectrometer (500 or 400 MHz for <sup>1</sup>H and 471 MHz for <sup>19</sup>F). The following abbreviations have been used for multiplicity assignments: “s” for singlet, “d” for doublet, “t” for triplet, “q” for quartet and “m” for multiplet. <sup>19</sup>F NMR spectra were recorded with proton decoupling. <sup>1</sup>H NMR spectra were referenced residual solvent peaks with respect to TMS (δ = 0 ppm).

*Photophysical measurements.* Optically dilute solutions of concentrations on the order of 10<sup>-5</sup> or 10<sup>-6</sup> M were prepared in spectroscopic or HPLC grade solvents for absorption and emission analysis. Absorption spectra were recorded at room temperature on a Shimadzu UV-2600 double beam spectrophotometer with a 1 cm quartz cuvette. Molar absorptivity determination was verified by linear regression analysis of values obtained from at least five independent solutions at varying concentrations with absorbance ranging from 6.88 × 10<sup>-1</sup> to 3.19 × 10<sup>2</sup> µM.

For emission studies, aerated solutions were bubbled with compressed air for 5 minutes and spectra were taken using the cuvette for absorption analysis. Degassed solutions were prepared via three freeze-pump-thaw cycles and spectra were taken using home-made Schlenk quartz cuvette. Steady-state emission, excitation spectra and time-resolved emission spectra were recorded at 298 K using either an Edinburgh Instruments F980 or

FS5. For steady-state measurements, samples were excited at 450 nm for **[Ru(bpy)<sub>3</sub>](PF<sub>6</sub>)<sub>2</sub>**, 390 nm for **[Ir(ppy)<sub>2</sub>(dtbbpy)]PF<sub>6</sub>**, 380 nm for **[Ir(dF(CF<sub>3</sub>)ppy)<sub>2</sub>(dtbbpy)]PF<sub>6</sub>**, **[Cu(dmp)(xantphos)]PF<sub>6</sub>** and **2CzPN**, 520 nm for **Eosin Y**, 420 nm for **4CzIPN**, and 360 nm for **pDTCz-DPmS**. For time-resolved measurements, samples were excited at 378 nm.

*Fitting of time-resolved luminescence measurements.* Time-resolved PL measurements were fitted to a sum of exponentials decay model, with chi-squared ( $\chi^2$ ) values between 0.9 and 2, using the FS5 software. Each component of the decay is assigned a weight, ( $w_i$ ), which is the contribution of the emission from each component to the total emission.

*Stern-Volmer quenching studies.* Optically dilute solutions of the photocatalyst with concentrations on the order of  $10^{-5}$  to  $10^{-6}$  M were prepared in spectroscopic or HPLC grade solvents for steady-state emission analysis. Degassed solutions were prepared by sparging with solvent saturated N<sub>2</sub> gas for 20 minutes prior to measurements. Aliquots of quencher solution were added to the cuvette, equipped with a septum, using a microsyringe. The cuvette was shaken briefly to ensure mixing of the quencher with the PC solution before the emission was recorded.

*Electrochemistry measurements.* Cyclic Voltammetry (CV) analysis was performed on an Electrochemical Analyzer potentiostat model 620E from CH Instruments at a sweep rate of 100 mV/s. Differential pulse voltammetry (DPV) was conducted with an increment potential of 0.004 V and a pulse amplitude, width, and period of 50 mV, 0.05, and 0.5 s, respectively. Samples were prepared as tetrahydrofuran (THF), dichloromethane (DCM), *N,N*-dimethylformamide (DMF) or acetonitrile (MeCN), solutions, which were degassed by sparging with solvent-saturated N<sub>2</sub> gas for 5 minutes prior to measurements. All measurements were performed using 0.1 M solution of tetra-*n*-butylammonium hexafluorophosphate ([<sup>*n*</sup>Bu<sub>4</sub>N]PF<sub>6</sub>). An Ag/Ag<sup>+</sup> electrode was used as the reference electrode while a glassy carbon electrode and a platinum wire were used as the working electrode and counter electrode, respectively. The redox potentials are reported relative to a saturated calomel electrode (SCE) with a ferrocenium/ferrocene (Fc/Fc<sup>+</sup>) redox couple

as the internal standard (0.38 V vs SCE for MeCN, 0.46 V vs SCE for DCM, 0.56 V vs SCE for THF and 0.45 V vs SCE for DMF).<sup>9,10</sup>

*Theoretical Calculations.* Density functional theory (DFT) calculations were performed on each of the eight photocatalysts. First, the structure of the photocatalyst in the singlet ground state was optimized. This was followed by two single point calculations, at the same geometry, of the radical cation and radical anion species, with a charge of +1 and -1 compared to the neutral form, respectively. The neutral form refers to the charge of the PC in its ground state; for the organic PCs, the neutral form has charge of 0, for the organometallic PCs, the neutral form refers to the +1 or +2 charge of the PC (depending on the PC in question). The difference in the total energy of the radical cation and radical anion of each PC compared to its neutral state was used to calculate the ionisation energy and electron affinity of each PC, respectively. Time-dependent density functional theory (TD-DFT)<sup>11</sup> was then used to calculate the 10 lowest energy vertical electronic excited states of both singlet and triplet multiplicity, again at the same geometry, from which the energies of S<sub>1</sub> and T<sub>1</sub> were obtained. The geometry of the triplet state of each PC was then optimized at the same level of theory using an unrestricted wavefunction, followed by a singlet single point calculation at the same triplet geometry. The difference in total energy between these two calculations was used to estimate the phosphorescence emission energy. Calculations of the organic PCs employed the PBE0 functional,<sup>12</sup> GD3BJ empirical dispersion,<sup>13</sup> and the 6-31G\*\* basis set,<sup>14-16</sup> while the organometallic PCs utilised the B3LYP functional,<sup>17</sup> GD3BJ empirical dispersion and the SBKJC-VDZ basis set (with effective core potentials)<sup>18-21</sup> for metal elements and the 6-31+G\*\*<sup>14-16,22</sup> basis set for light elements.<sup>23</sup> The radical calculations were performed in the doublet state using unrestricted orbitals, while the single point, ground-state optimisation and excited-state calculations were performed in the singlet state using restricted orbitals. The optimised triplet state calculations were performed using unrestricted orbitals in the triplet state. Cationic organometallic complexes were considered as single species without outer-sphere counterions (i.e., as charged molecules). Both organic and organometallic PCs used the same functional and basis set(s) for the excited-state calculations as for the ground state, radical and optimised triplet calculations. Each of the six calculations for each PC were repeated using four different solvents, THF, DCM, DMF, and MeCN, using the implicit solvation

polarizable continuum model (IEFPCM).<sup>24-26</sup> TD-DFT excited state calculations were performed using the state specific correction procedure of Scalmani<sup>27</sup> and co-workers for the S<sub>1</sub> state, and using a non-equilibrated solvent environment. All calculations were performed using Gaussian 16, revision C.01,<sup>28</sup> and all program defaults, except those noted above, were left as default for that program. All calculations were submitted and processed using in-house developed software, Silico ver 2.1, which incorporates a number of publicly available software libraries, including: cclib<sup>29</sup> for parsing of result files, VMD/Tachyon<sup>30,31</sup> for 3D rendering, Matplotlib<sup>32</sup> for drawing of graphs and Open Babel/Pybel<sup>33,34</sup> for file interconversion.

The electronic distribution and localization of the singlet excited states were visualized using the electron density difference maps (ED-DMs).<sup>35</sup> *GaussSum 2.2*<sup>29</sup> and *Chemissian v4.67*<sup>36</sup> were employed to visualize the absorption spectra (simulated with Gaussian distribution with a full-width at half maximum (fwhm) set to 3000 cm<sup>-1</sup>) and to calculate the fractional contributions of various groups to each molecular orbital. All calculated structures and Kohn-Sham orbitals were visualized with Gaussview v5.0.<sup>37</sup>

## DFT calculations

HOMO energies, LUMO energies and the ground-state dipole moment magnitude were calculated at the ground-state optimised geometry.  $S_1$  and  $T_1$  are the vertical electronic excited-state energies of the lowest energy singlet and triplet excited states, respectively, at the ground state geometry.  $\Delta E_{ST}$  is the difference between them. Density plots of the HOMO and LUMO are taken from the ground-state optimised calculation in MeCN.

The  $S_1$  energies were calculated using time-dependent DFT at the  $S_0$  ground state geometry, using the state specific solvent correction of Scalmani *et al.*<sup>27</sup> and non-equilibrium solvation, thus modelling a vertical absorption process. Meanwhile, the  $T_1$  energies were calculated *via* the delta-SCF approach comparing the optimised  $T_1$  geometry calculated using unrestricted DFT and the  $S_0$  energy at the same geometry, thus modelling a vertical, de-excitation (or emission) process. For **[Ru(bpy)<sub>3</sub>]<sup>2+</sup>**, **[Cu(dmp)(xantphos)]<sup>+</sup>**, **Eosin Y**, **4CzIPN**, **2CzPN** and **pDTCz-DPmS**, both excited-state energies remained essentially constant across the four solvents, varying only between 0-0.04 eV. The excited-state energies of the iridium complexes, by comparison, show a greater degree of solvent dependency, with the excited states increasing in energy (up to 0.16 eV) in more polar solvents. For example, the  $T_1$  state of **[Ir(dF(CF<sub>3</sub>)ppy)<sub>2</sub>(dtbbpy)]<sup>+</sup>** increases in energy from 2.42 eV in THF to 2.58 eV in MeCN. This is in direct contrast to what is observed experimentally (Table 1 in the main manuscript), whereby the  $E_{0,0}(T_1)$  remains essentially constant, suggesting that *in silico* modelling is not appropriate to predict excited state energies.

### **[Ru(bpy)<sub>3</sub>]<sup>2+</sup>**

Table S1. Selected data from DFT calculations for **[Ru(bpy)<sub>3</sub>]<sup>2+</sup>** in the four solvents.

|                                          | THF   | DCM   | DMF   | MeCN  |
|------------------------------------------|-------|-------|-------|-------|
| HOMO / eV                                | -6.77 | -6.66 | -6.24 | -6.24 |
| LUMO / eV                                | -3.30 | -3.19 | -2.78 | -2.78 |
| $\Delta E_{\text{HOMO-LUMO}}$ / eV       | 3.47  | 3.47  | 3.46  | 3.46  |
| Ground-state dipole moment magnitude / D | 0.03  | 0.03  | 0.02  | 0.02  |
| $S_1$ / eV                               | 2.63  | 2.64  | 2.63  | 2.63  |
| $T_1$ / eV                               | 1.95  | 1.95  | 1.92  | 1.92  |

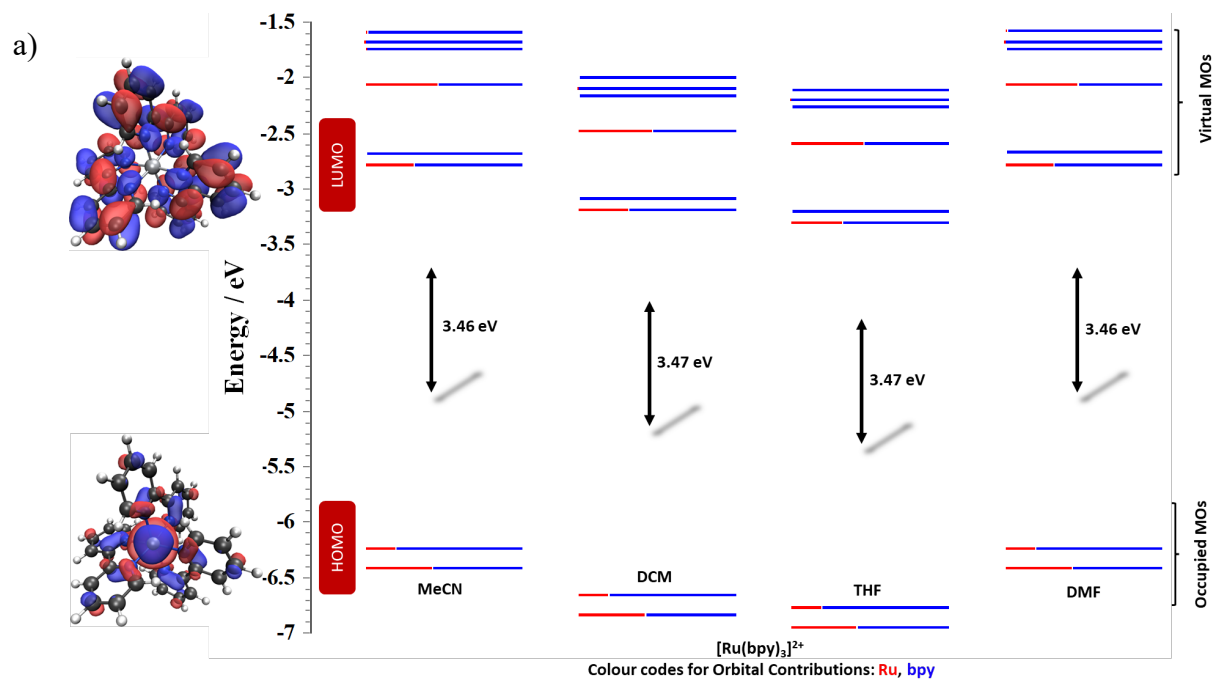

b)

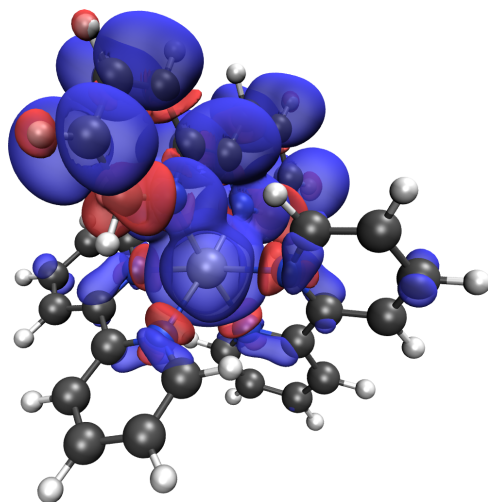

Figure S1. a) Orbital contributions for  $[\text{Ru}(\text{bpy})_3]^{2+}$  in the four solvents and b) total spin density in the optimized triplet state in MeCN.



**[Ir(ppy)<sub>2</sub>(dtbbpy)]<sup>+</sup>**Table S2. Selected data from DFT calculations for **[Ir(ppy)<sub>2</sub>(dtbbpy)]<sup>+</sup>** in the four solvents.

|                                          | THF   | DCM   | DMF   | MeCN  |
|------------------------------------------|-------|-------|-------|-------|
| HOMO / eV                                | -6.01 | -5.96 | -5.81 | -5.82 |
| LUMO / eV                                | -2.76 | -2.71 | -2.48 | -2.49 |
| $\Delta E_{\text{HOMO-LUMO}}$ / eV       | 3.24  | 3.26  | 3.33  | 3.33  |
| Ground state dipole moment magnitude / D | 8.76  | 8.89  | 9.51  | 9.50  |
| S <sub>1</sub> / eV                      | 2.56  | 2.58  | 2.65  | 2.65  |
| T <sub>1</sub> / eV                      | 2.13  | 2.13  | 2.15  | 2.15  |

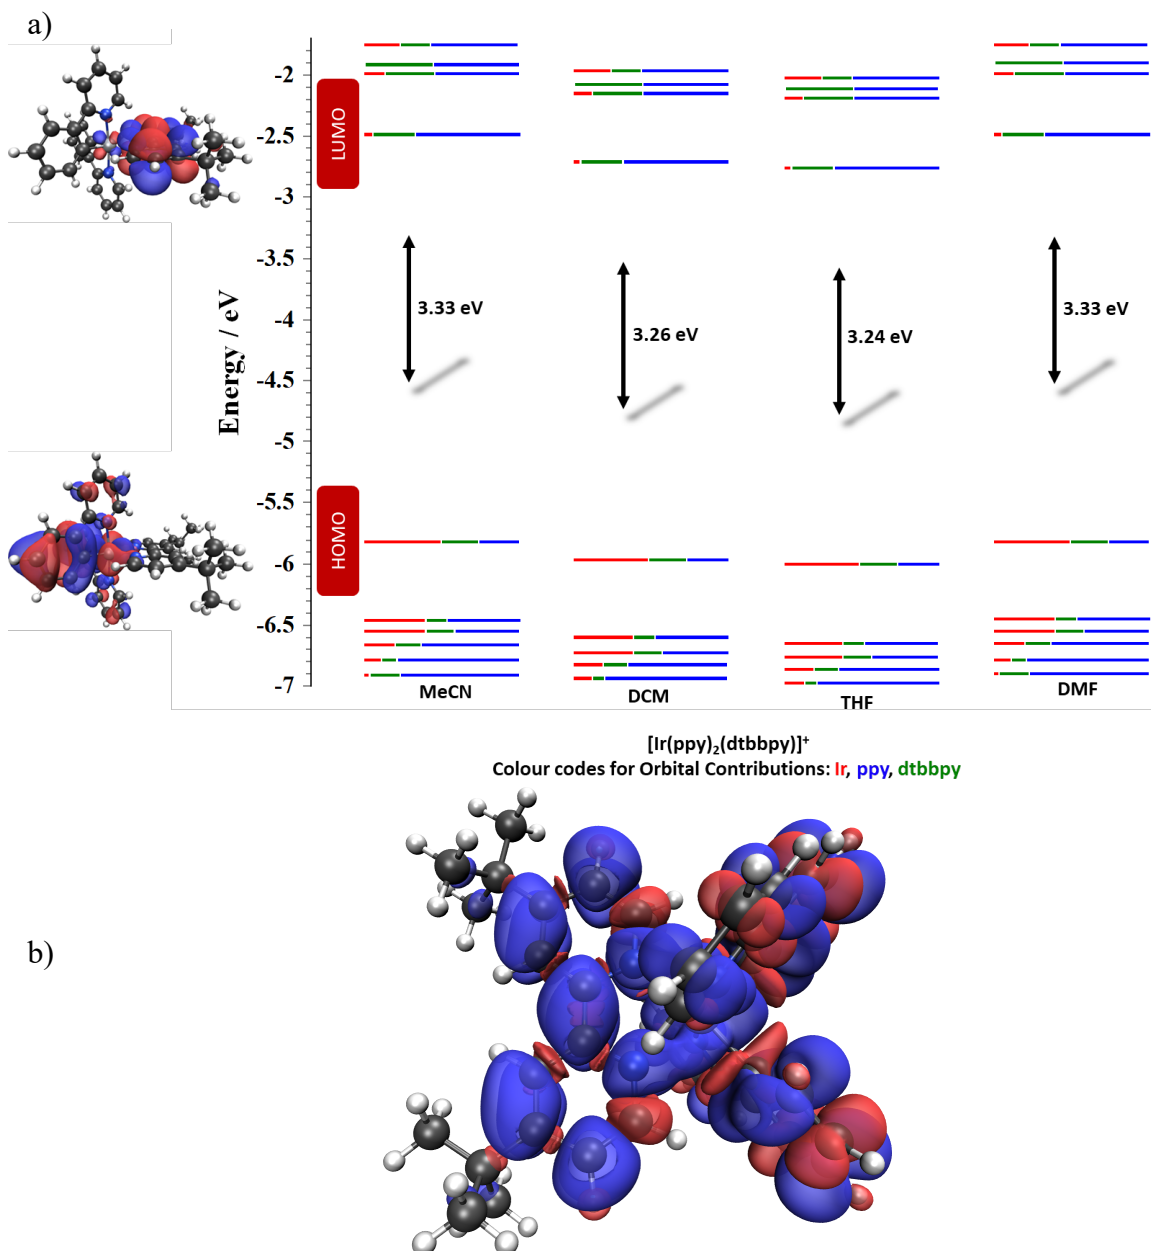

Figure S2. a) Orbital contributions for  $[\text{Ir}(\text{ppy})_2(\text{dtbbpy})]^+$  in the four solvents and b) total spin density in the optimized triplet state in MeCN.

**[Ir(dF(CF<sub>3</sub>)ppy)<sub>2</sub>(dtbbpy)]<sup>+</sup>**Table S3. Selected data from DFT calculations for **[Ir(dF(CF<sub>3</sub>)ppy)<sub>2</sub>(dtbbpy)]<sup>+</sup>** in the four solvents.<sup>a</sup>

|                                          | THF   | DCM   | DMF   | MeCN  |
|------------------------------------------|-------|-------|-------|-------|
| HOMO / eV                                | -6.64 | -6.59 | -6.38 | -6.39 |
| LUMO / eV                                | -2.97 | -2.91 | -2.65 | -2.65 |
| $\Delta E_{\text{HOMO-LUMO}}$ / eV       | 3.67  | 3.68  | 3.73  | 3.74  |
| Ground state dipole moment magnitude / D | 9.42  | 9.58  | 9.94  | 9.96  |
| S <sub>1</sub> / eV                      | 2.99  | 3.00  | 3.06  | 3.06  |
| T <sub>1</sub> / eV                      | 2.42  | 2.43  | 2.42  | 2.58  |

<sup>a</sup> Ground-state optimisation for DCM and DMF each had 1 small negative frequency each (-5.04 cm<sup>-1</sup> and -17.22 cm<sup>-1</sup>, respectively).

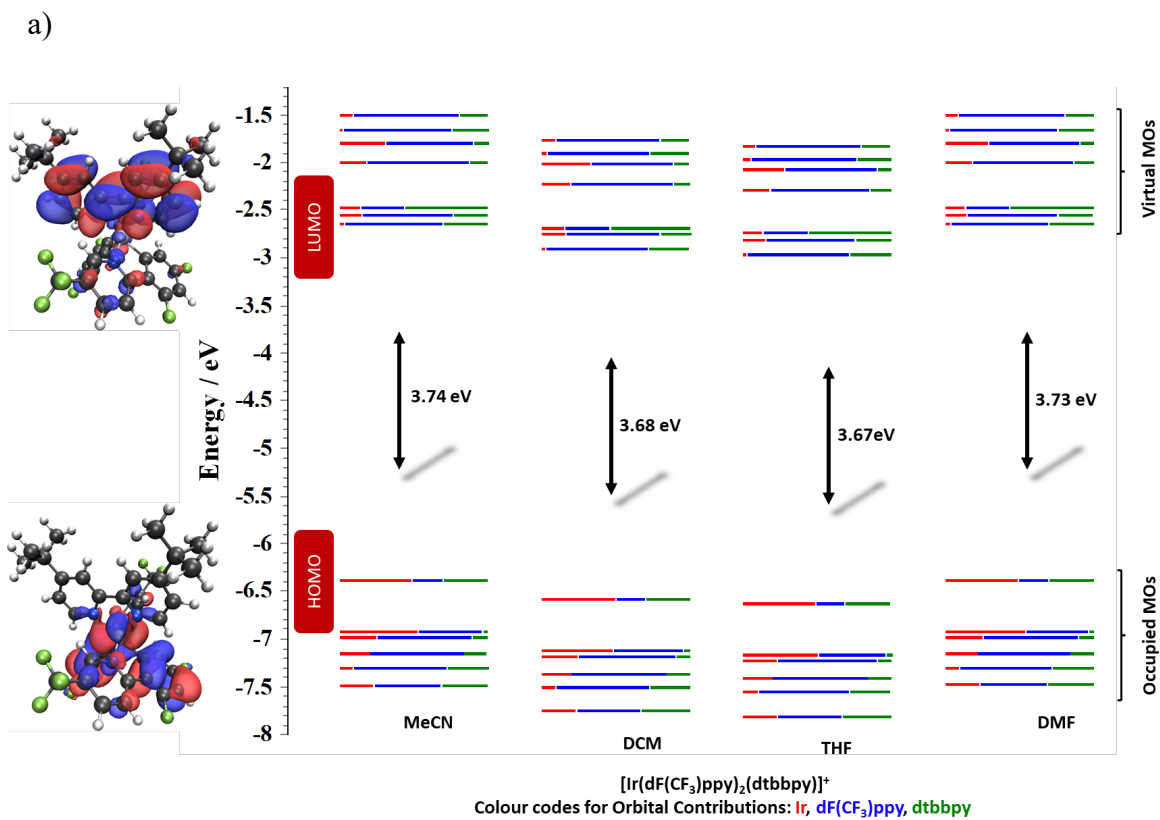

b)

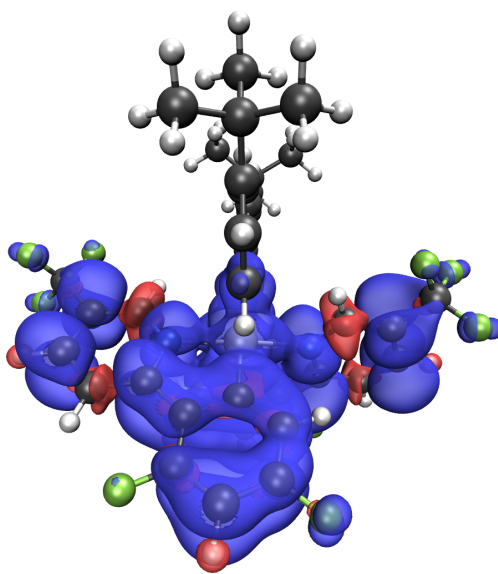

Figure S3. a) Orbital contributions for  $[\text{Ir}(\text{dF}(\text{CF}_3)\text{ppy})_2(\text{dtbbpy})]^+$  in the four solvents and b) total spin density in the optimized triplet state in MeCN.

**[Cu(dmp)(xantphos)]<sup>+</sup>**Table S4. Selected data from DFT calculations for [Cu(dmp)(xantphos)]<sup>+</sup> in the four solvents.

|                                          | THF   | DCM   | DMF   | MeCN  |
|------------------------------------------|-------|-------|-------|-------|
| HOMO / eV                                | -6.06 | -6.02 | -5.86 | -5.86 |
| LUMO / eV                                | -2.53 | -2.48 | -2.29 | -2.29 |
| $\Delta E_{\text{HOMO-LUMO}}$ / eV       | 3.53  | 3.54  | 3.57  | 3.57  |
| Ground state dipole moment magnitude / D | 5.76  | 5.82  | 6.10  | 6.10  |
| S <sub>1</sub> / eV                      | 2.90  | 2.90  | 2.93  | 2.93  |
| T <sub>1</sub> / eV                      | 1.72  | 1.80  | 1.79  | 1.79  |

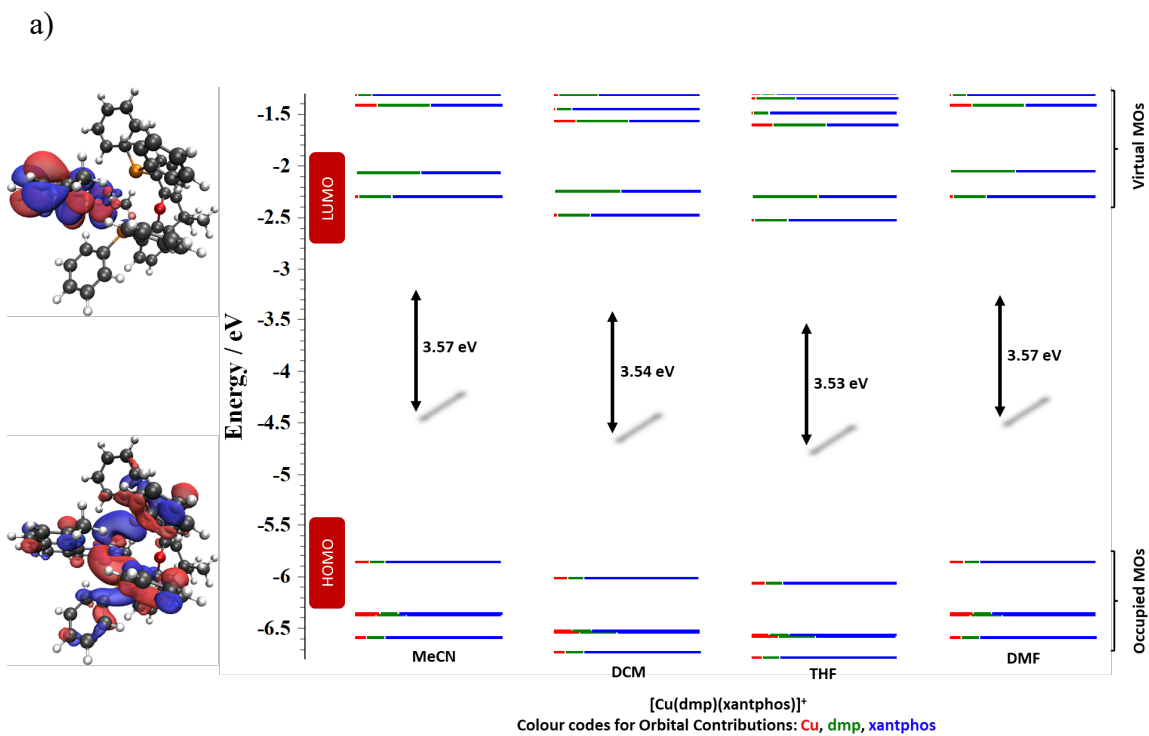

b)

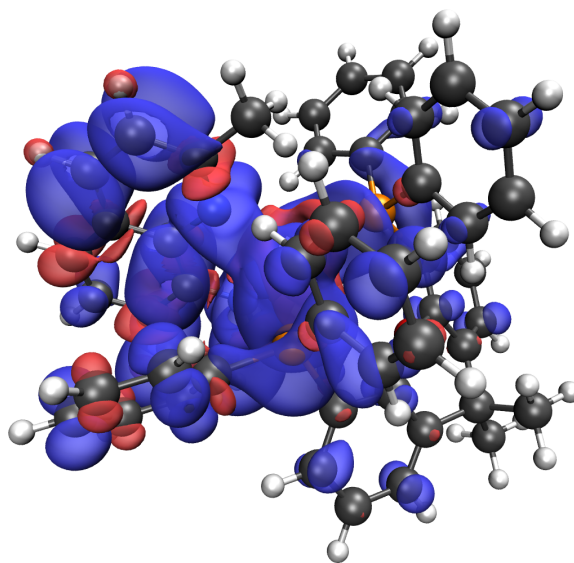

Figure S4. a) Orbital contributions for  $[\text{Cu}(\text{dmp})(\text{xantphos})]^+$  in the four solvents and b) total spin density in the optimized triplet state in MeCN.

## Eosin Y

Table S5. Selected data from DFT calculations for **Eosin Y** in the four solvents.

| Select data from DFT calculations:       | THF   | DCM   | DMF   | MeCN  |
|------------------------------------------|-------|-------|-------|-------|
| HOMO / eV                                | -6.61 | -6.61 | -6.62 | -6.62 |
| LUMO / eV                                | -1.50 | -1.50 | -1.50 | -1.50 |
| $\Delta E_{\text{HOMO-LUMO}}$ / eV       | 5.11  | 5.11  | 5.12  | 5.12  |
| Ground state dipole moment magnitude / D | 6.47  | 6.54  | 6.83  | 6.82  |
| S <sub>1</sub> / eV                      | 4.35  | 4.35  | 4.35  | 4.35  |
| T <sub>1</sub> / eV                      | 3.07  | 3.07  | 3.06  | 3.06  |

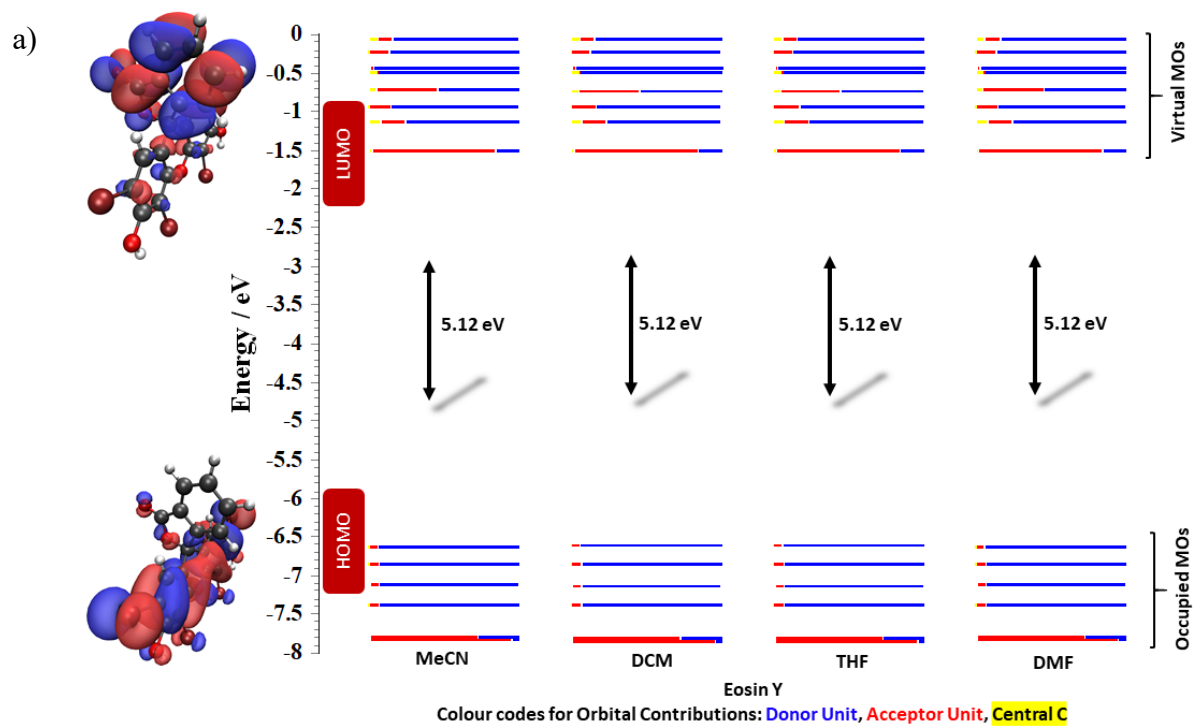

b)

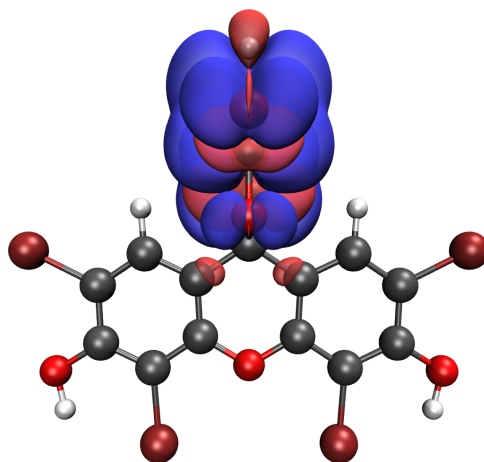

Figure S5. a) Orbital contributions for **Eosin Y** in the four solvents and b) total spin density in the optimized triplet state in MeCN.



## 4CzIPN

Table S6. Selected data from DFT calculations for **4CzIPN** in the four solvents.<sup>a</sup>

|                                          | THF   | DCM   | DMF   | MeCN  |
|------------------------------------------|-------|-------|-------|-------|
| HOMO / eV                                | -5.98 | -5.99 | -6.02 | -6.02 |
| LUMO / eV                                | -2.51 | -2.54 | -2.54 | -2.54 |
| $\Delta E_{\text{HOMO-LUMO}}$ / eV       | 3.47  | 3.47  | 3.48  | 3.48  |
| Ground state dipole moment magnitude / D | 5.35  | 5.36  | 5.32  | 5.31  |
| S <sub>1</sub> / eV                      | 2.66  | 2.66  | 2.66  | 2.66  |
| T <sub>1</sub> / eV                      | 2.15  | 2.11  | 2.09  | 2.11  |

<sup>a</sup> Triplet optimisation for MeCN and THF had 1 small negative frequency each (-19.80 cm<sup>-1</sup> and -13.61 cm<sup>-1</sup> respectively).

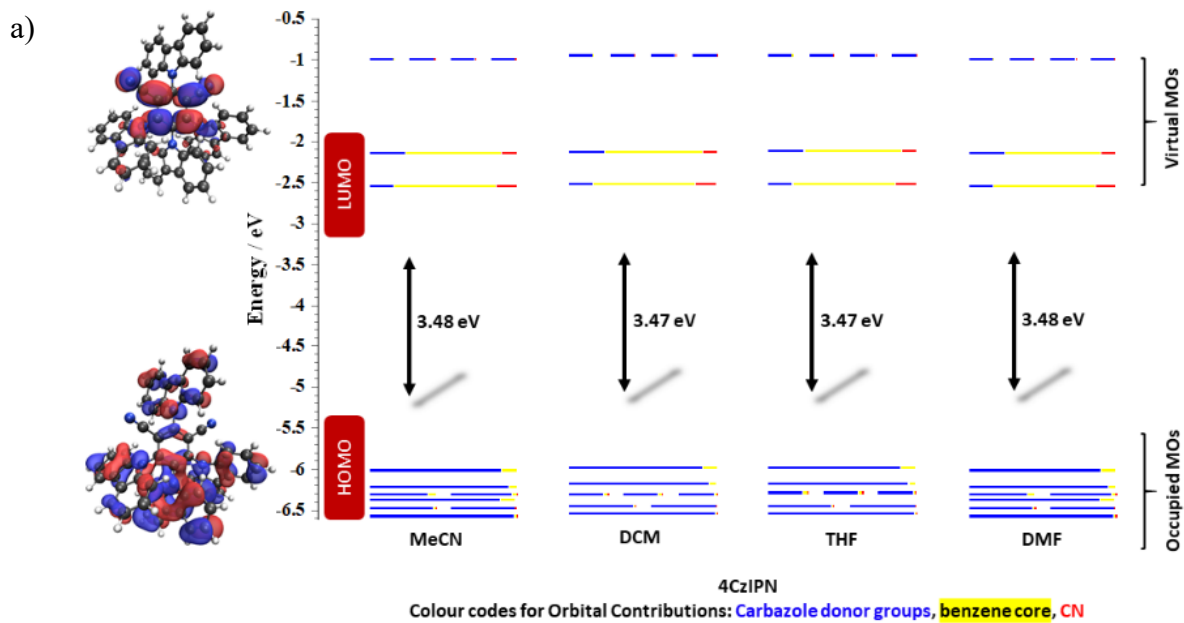

b)

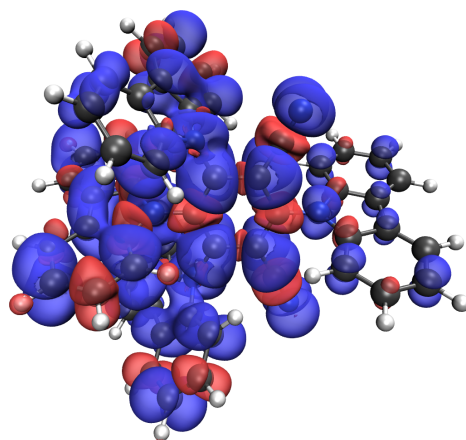

Figure S6. a) Orbital contributions for **4CzIPN** in the four solvents and b) total spin density in the optimized triplet state in MeCN.

**2CzPN**Table S7. Selected data from DFT calculations for **2CzPN** in the four solvents.

|                                          | THF   | DCM   | DMF   | MeCN  |
|------------------------------------------|-------|-------|-------|-------|
| HOMO / eV                                | -6.04 | -6.04 | -6.04 | -6.04 |
| LUMO / eV                                | 2.40  | -2.40 | -2.39 | -2.40 |
| $\Delta E_{\text{HOMO-LUMO}}$ / eV       | 3.64  | 3.64  | 3.65  | 3.64  |
| Ground state dipole moment magnitude / D | 8.41  | 8.41  | 8.35  | 8.35  |
| S <sub>1</sub> / eV                      | 2.90  | 2.90  | 2.90  | 2.90  |
| T <sub>1</sub> / eV                      | 2.18  | 2.18  | 2.14  | 2.14  |

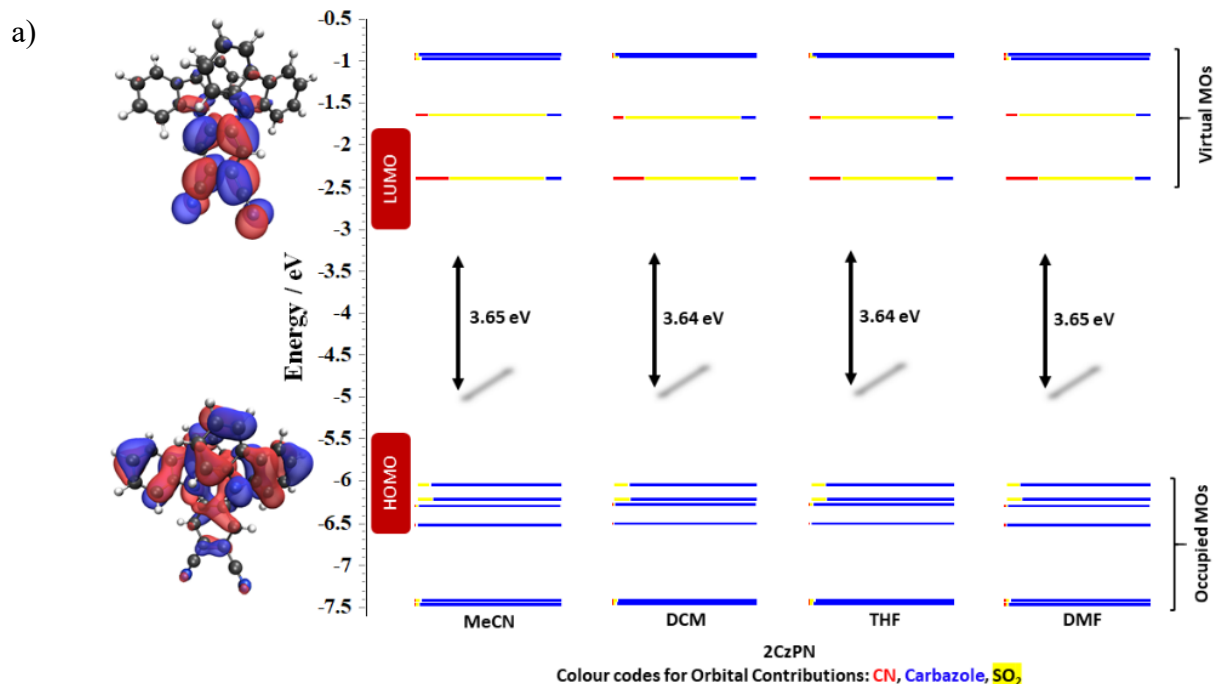

b)

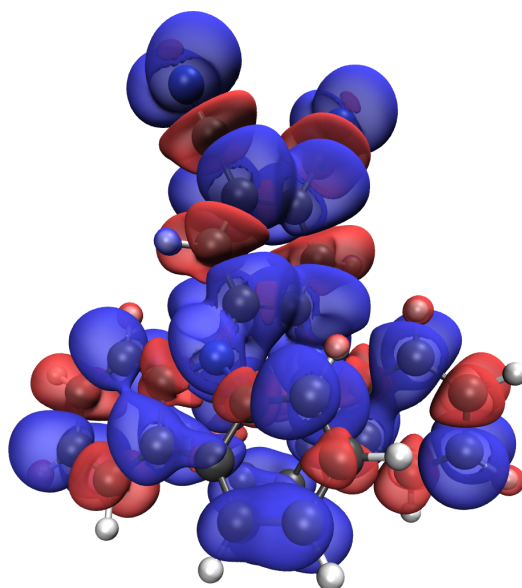

Figure S7. a) Orbital contributions for **2CzPN** in the four solvents and b) total spin density in the optimized triplet state in MeCN.

**pDTCz-DPmS**Table S8. Selected data from DFT calculations for **pDTCz-DPmS** in the four solvents.

|                                          | THF   | DCM   | DMF   | MeCN  |
|------------------------------------------|-------|-------|-------|-------|
| HOMO / eV                                | -6.05 | -6.06 | -6.08 | -6.08 |
| LUMO / eV                                | -1.89 | -1.89 | -1.90 | -1.90 |
| $\Delta E_{\text{HOMO-LUMO}}$ / eV       | 4.16  | 4.17  | 4.18  | 4.18  |
| Ground state dipole moment magnitude / D | 5.72  | 5.75  | 5.91  | 5.91  |
| S <sub>1</sub> / eV                      | 3.47  | 3.47  | 3.47  | 3.47  |
| T <sub>1</sub> / eV                      | 2.75  | 2.51  | 2.71  | 2.71  |

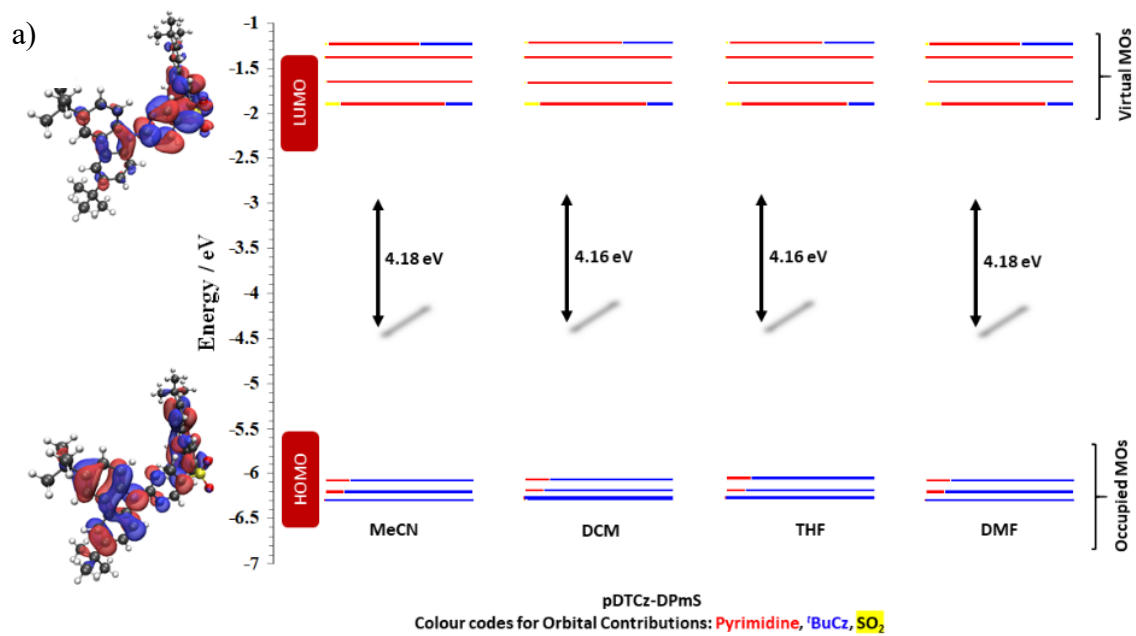

b)

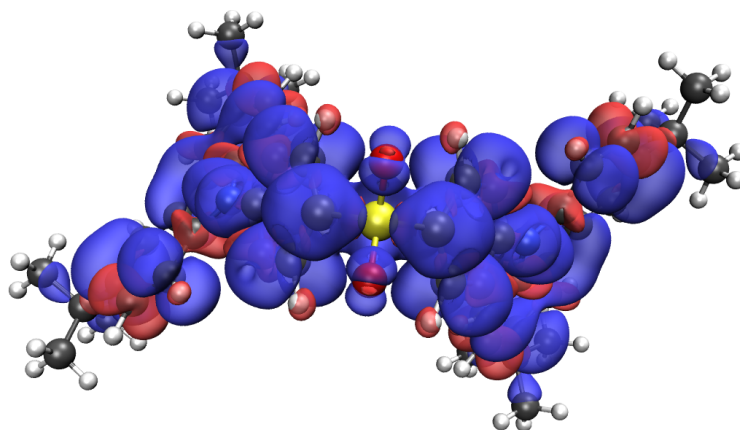

Figure S8. a) Orbital contributions for **pDTCz-DPmS** in the four solvents and b) total spin density in the optimized triplet state in MeCN.

Table S9. Calculated ionization potentials and electron affinities for the eight PCs in the four different solvents.<sup>a</sup>

|                                                                    |         | THF   | DCM   | DMF   | MeCN  |
|--------------------------------------------------------------------|---------|-------|-------|-------|-------|
| <b>[Ru(bpy)<sub>3</sub>]<sup>2+</sup></b>                          | IP / eV | -6.58 | -6.59 | -7.12 | -7.11 |
|                                                                    | EA / eV | -3.31 | -3.23 | -2.93 | -2.93 |
| <b>[Ir(ppy)<sub>2</sub>(dtbbpy)]<sup>+</sup></b>                   | IP / eV | -5.99 | -5.92 | -5.65 | -5.65 |
|                                                                    | EA / eV | -2.71 | -2.69 | -2.60 | -2.60 |
| <b>[Ir(dF(CF<sub>3</sub>)ppy)<sub>2</sub>(dtbbpy)]<sup>+</sup></b> | IP / eV | -6.64 | -6.56 | -6.23 | -6.24 |
|                                                                    | EA / eV | -2.93 | -2.90 | -2.77 | -2.78 |
| <b>[Cu(dmp)(xantphos)]<sup>+</sup></b>                             | IP / eV | -6.03 | -5.96 | -5.70 | -5.70 |
|                                                                    | EA / eV | -2.24 | -2.23 | -2.18 | -2.18 |
| <b>Eosin Y</b>                                                     | IP / eV | -6.57 | -6.54 | -6.41 | -6.41 |
|                                                                    | EA / eV | -1.50 | -1.53 | -1.69 | -1.69 |
| <b>4CzIPN</b>                                                      | IP / eV | -5.89 | -5.87 | -5.79 | -5.79 |
|                                                                    | EA / eV | -2.61 | -2.65 | -2.79 | -2.79 |
| <b>2CzPN</b>                                                       | IP / eV | -5.95 | -5.92 | -5.80 | -5.80 |
|                                                                    | EA / eV | -2.44 | -2.47 | -2.61 | -2.61 |
| <b>pDTCz-DPmS</b>                                                  | IP / eV | -5.98 | -5.96 | -5.88 | -5.89 |
|                                                                    | EA / eV | -1.98 | -2.01 | -2.14 | -2.14 |

<sup>a</sup>The level of theory used was PBE0/6-31G\*\*/GD3BJ for organic PCs and B3LYP/6-31+G\*\*/SBKJC-VDZ-ECP/GD3BJ for organometallic PCs.

## Electrochemistry

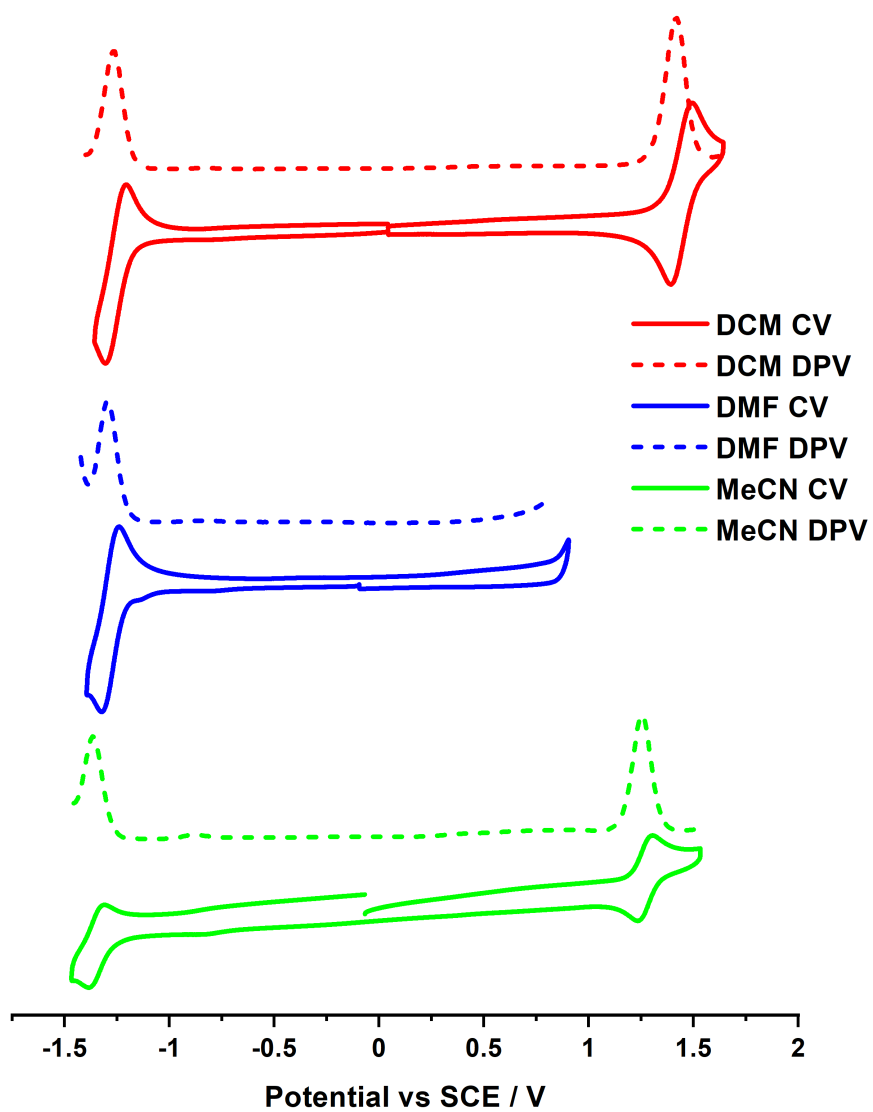

Figure S9. CV and DPV obtained for  $[\text{Ru}(\text{bpy})_3](\text{PF}_6)_2$  in the various solvents at scan rate of  $0.1 \text{ V s}^{-1}$ .



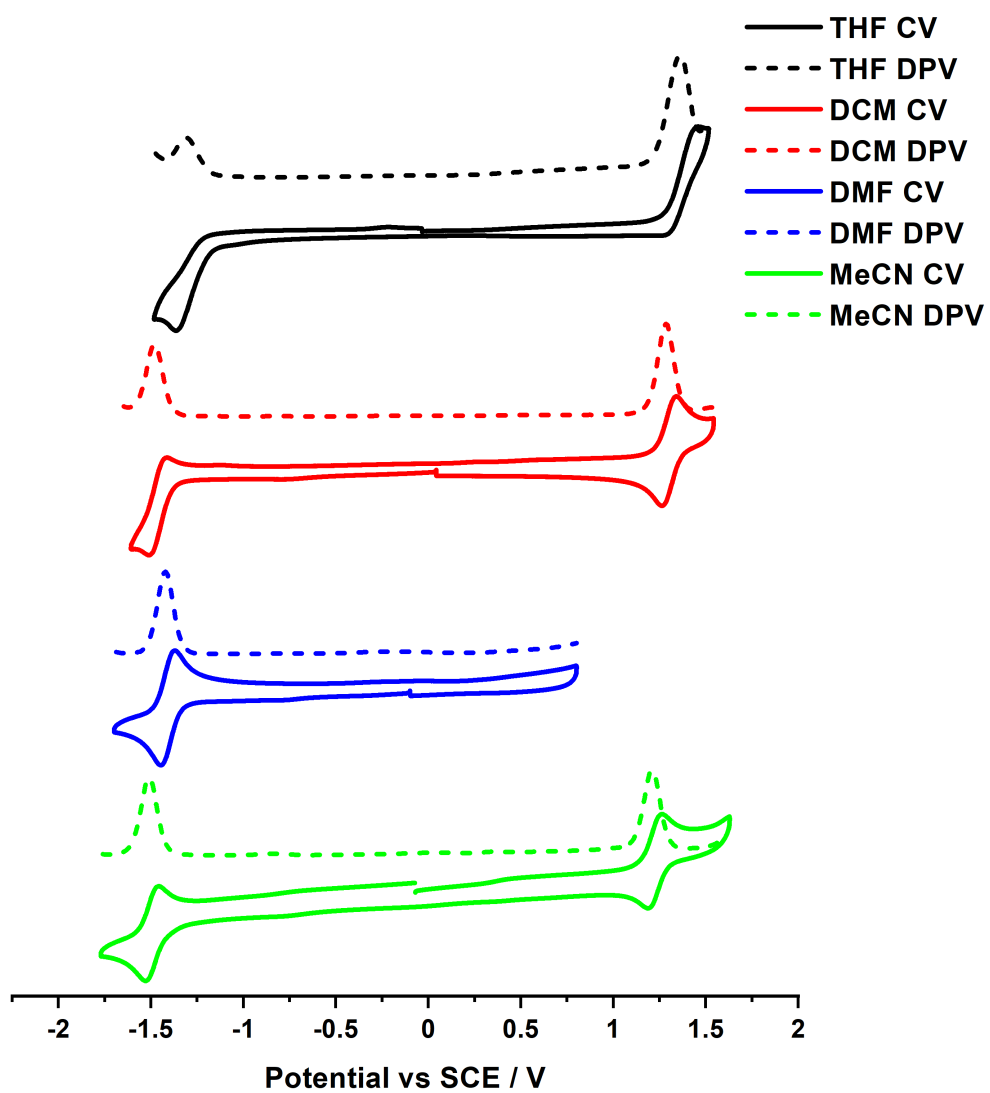

Figure S10. CV and DPV obtained for  $[\text{Ir}(\text{ppy})_2(\text{dtbbpy})]\text{PF}_6$  in the various solvents at scan rate of  $0.1 \text{ V s}^{-1}$ .

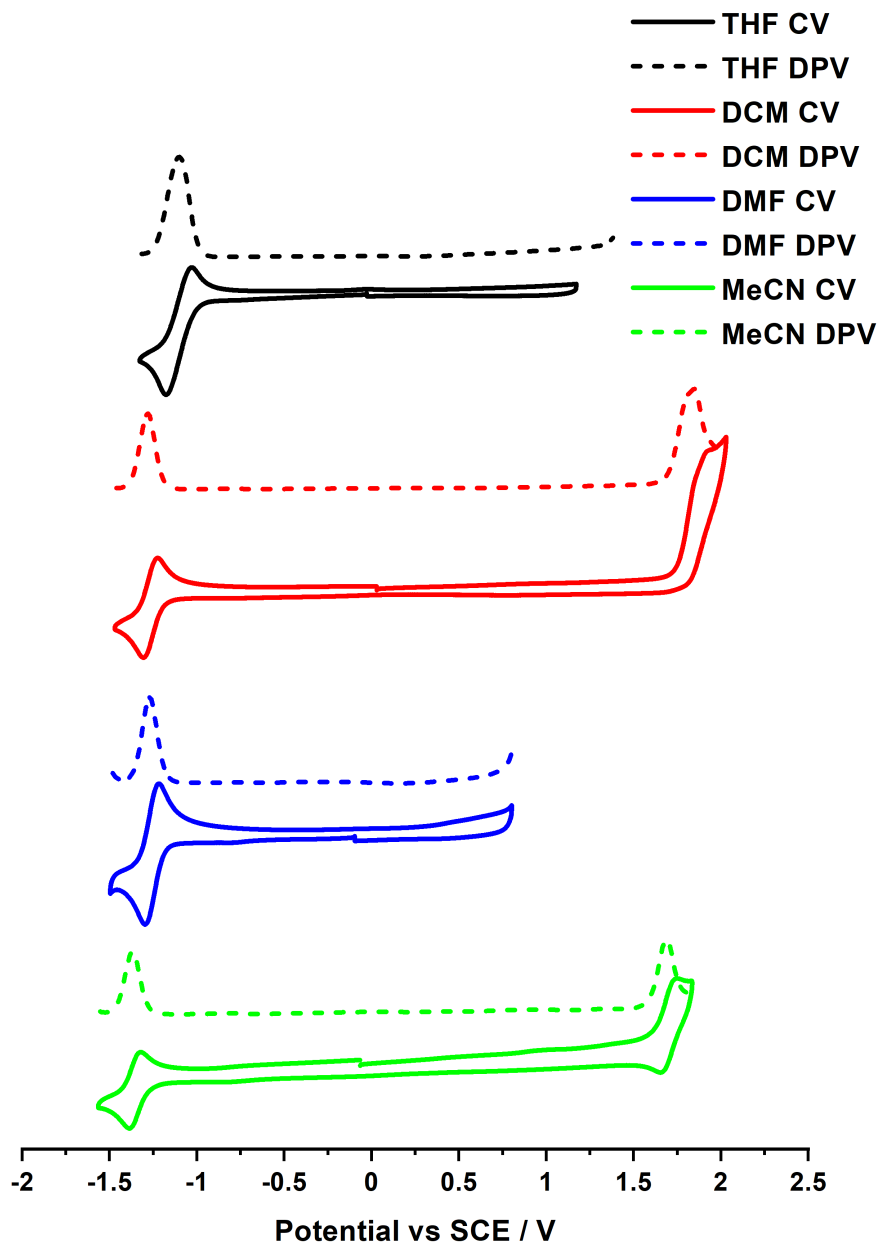

Figure S11. CV and DPV obtained for  $[\text{Ir}(\text{dF}(\text{CF}_3)\text{ppy})_2(\text{dtbbpy})]\text{PF}_6$  in the various solvents at scan rate of  $0.1 \text{ V s}^{-1}$ .

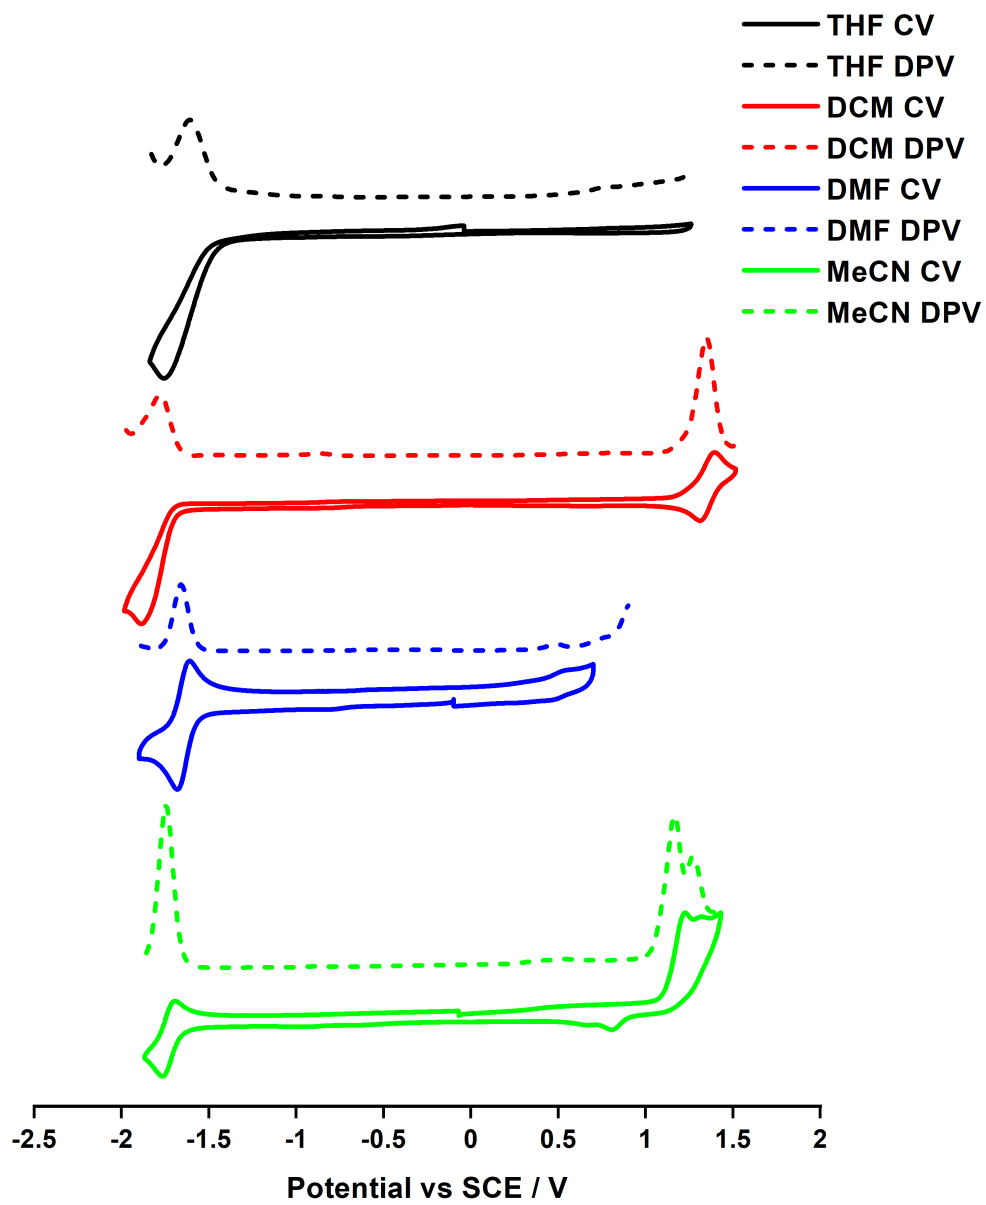

Figure S12. CV and DPV obtained for  $[\text{Cu}(\text{dmp})(\text{xantphos})]\text{PF}_6$  in the various solvents at scan rate of  $0.1 \text{ V s}^{-1}$ .

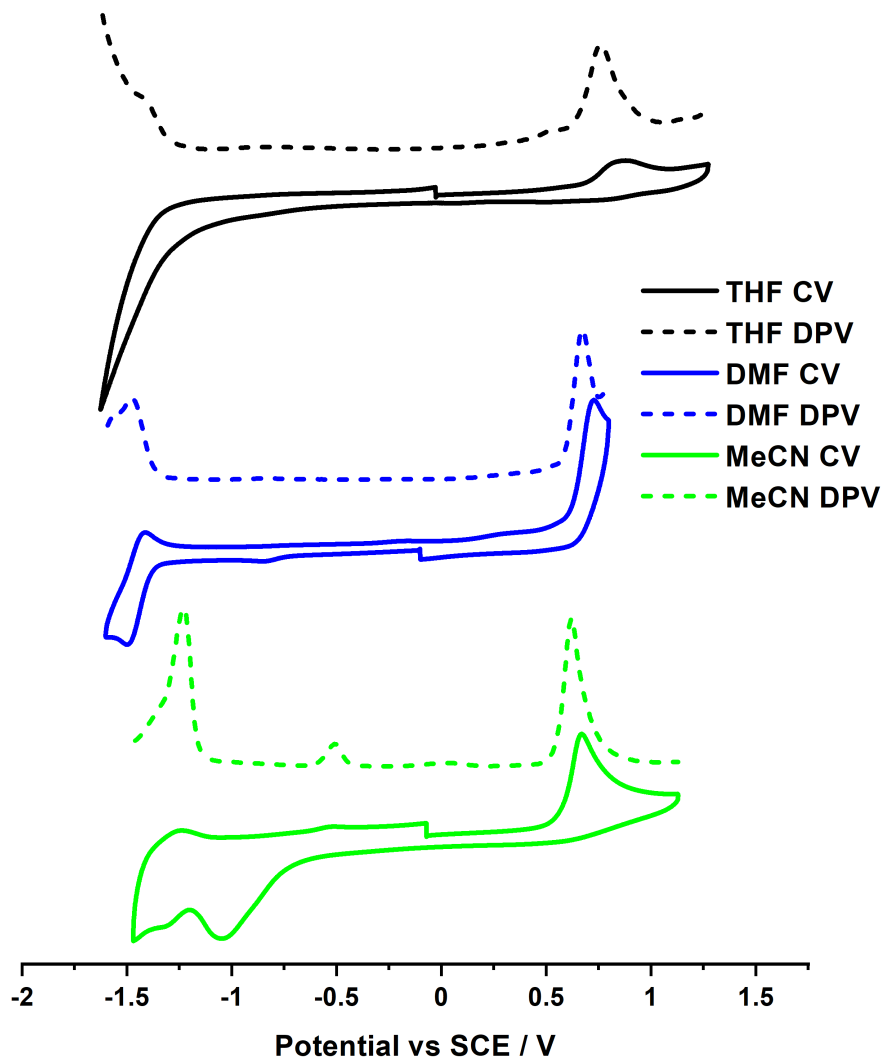

Figure S13. CV and DPV obtained for **Eosin Y** in the various solvents at scan rate of 0.1 V s<sup>-1</sup>.

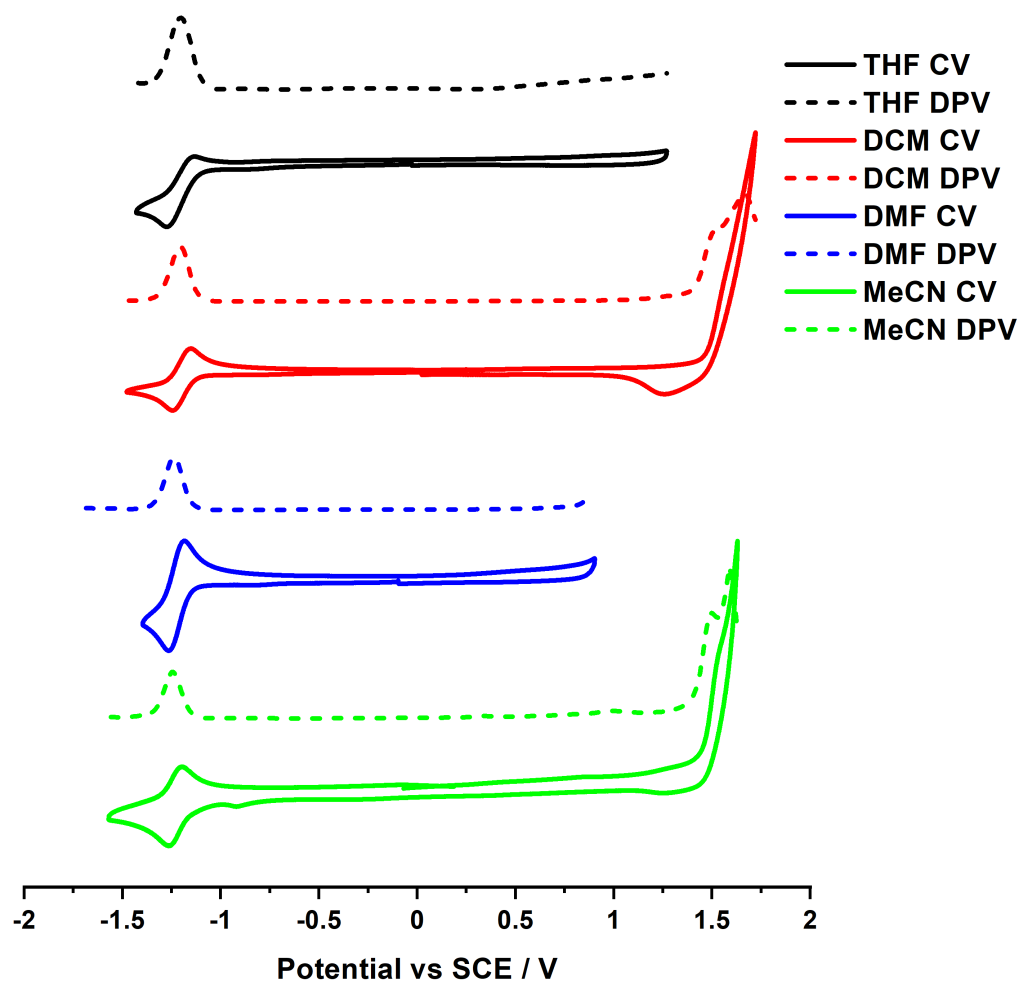

Figure S14. CV and DPV obtained for 4CzIPN in the various solvents at scan rate of 0.1 V s<sup>-1</sup>. Spectra taken from Ref <sup>7</sup>.

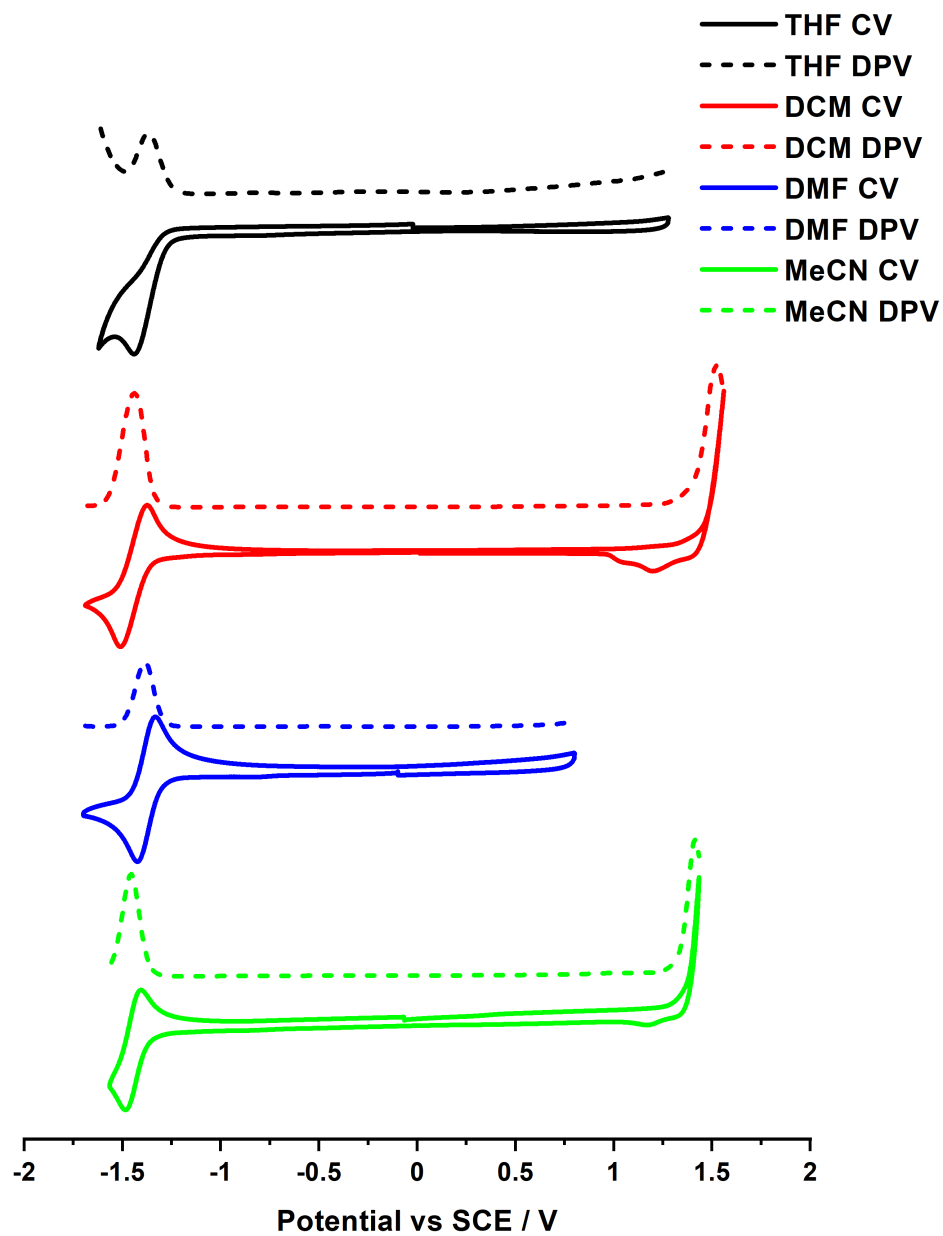

Figure S15. CV and DPV obtained for **2CzPN** in the various solvents at scan rate of 0.1 V s<sup>-1</sup>.

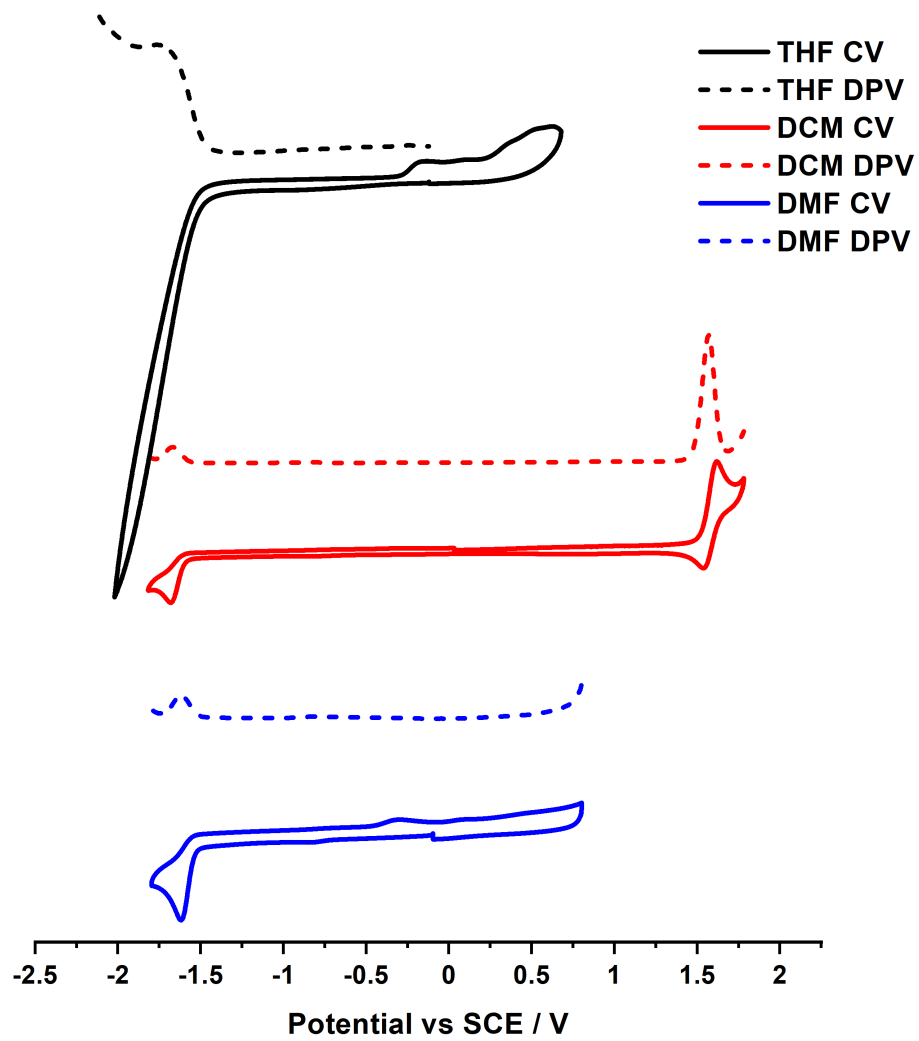

Figure S16. CV and DPV obtained for **pDTCz-DPmS** in the various solvents at scan rate of  $0.1 \text{ V s}^{-1}$ . Spectra taken from Ref<sup>7</sup>.

Table S10. Ground-state redox potentials of the eight PCs in the four solvents.<sup>a</sup>

|                                                                      |                      | THF   | DCM   | DMF   | MeCN                            |
|----------------------------------------------------------------------|----------------------|-------|-------|-------|---------------------------------|
| <b>[Ru(bpy)<sub>3</sub>](PF<sub>6</sub>)<sub>2</sub></b>             | E <sub>ox</sub> / V  |       | 1.42  |       | 1.25 (1.29) <sup>b</sup>        |
|                                                                      | E <sub>red</sub> / V |       | -1.27 | -1.29 | -1.37 (-1.33) <sup>b</sup>      |
|                                                                      | ΔE / V               |       | 2.69  |       | 2.62                            |
| <b>[Ir(ppy)<sub>2</sub>(dtbbpy)]PF<sub>6</sub></b>                   | E <sub>ox</sub> / V  | 1.36  | 1.28  |       | 1.21 (1.21) <sup>c</sup>        |
|                                                                      | E <sub>red</sub> / V | -1.31 | -1.48 | -1.42 | -1.51 (-1.51) <sup>c</sup>      |
|                                                                      | ΔE / V               | 2.67  | 2.76  |       | 2.72                            |
| <b>[Ir(dF(CF<sub>3</sub>)ppy)<sub>2</sub>(dtbbpy)]PF<sub>6</sub></b> | E <sub>ox</sub> / V  |       | 1.85  |       | 1.69 (1.69) <sup>c</sup>        |
|                                                                      | E <sub>red</sub> / V | -1.10 | -1.28 | -1.27 | -1.37 (-1.37) <sup>c</sup>      |
|                                                                      | ΔE / V               |       | 3.13  |       | 3.06                            |
| <b>[Cu(dmp)(xantphos)]PF<sub>6</sub></b>                             | E <sub>ox</sub> / V  |       | 1.35  |       | 1.16 / 1.27 (1.20) <sup>d</sup> |
|                                                                      | E <sub>red</sub> / V | -1.61 | -1.77 | -1.66 | -1.75 (-1.73) <sup>d</sup>      |
|                                                                      | ΔE / V               |       | 3.12  |       | 2.91/3.02                       |
| <b>Eosin Y</b>                                                       | E <sub>ox</sub> / V  | 0.76  |       | 0.67  | 0.62 (0.78) <sup>e</sup>        |
|                                                                      | E <sub>red</sub> / V | -1.43 |       | -1.47 | -1.23 (-1.06) <sup>e</sup>      |
|                                                                      | ΔE / V               | 2.19  |       | 2.14  | 1.85                            |
| <b>4CzIPN</b>                                                        | E <sub>ox</sub> / V  |       | 1.51  |       | 1.50 (1.49) <sup>f</sup>        |
|                                                                      | E <sub>red</sub> / V | -1.20 | -1.21 | -1.24 | -1.24 (-1.24) <sup>f</sup>      |
|                                                                      | ΔE / V               |       | 2.72  |       | 2.74                            |
| <b>2CzPN</b>                                                         | E <sub>ox</sub> / V  |       | 1.53  |       | 1.41 (1.47) <sup>g</sup>        |
|                                                                      | E <sub>red</sub> / V | -1.37 | -1.44 | -1.39 | -1.46 (-1.45) <sup>g</sup>      |
|                                                                      | ΔE / V               |       | 2.97  |       | 2.87                            |
| <b>pDTCz-DPmS<sup>h</sup></b>                                        | E <sub>ox</sub> / V  |       | 1.57  |       |                                 |
|                                                                      | E <sub>red</sub> / V | -1.77 | -1.67 | -1.62 |                                 |
|                                                                      | ΔE / V               |       | 3.24  |       |                                 |

<sup>a</sup> Values are reported vs SCE. Ground state redox potentials are obtained from DPV under N<sub>2</sub>. ΔE = E<sub>red</sub> - E<sub>ox</sub>. When no value is reported, this is due to poor solubility of the PC in that solvent or no redox wave was detected within the electrochemical window of the solvent. Values in parentheses are taken from the literature. <sup>b</sup> Value taken from Ref<sup>38</sup>. <sup>c</sup> Value taken from Ref<sup>39</sup>. <sup>d</sup> Value taken from Ref<sup>40</sup> and the original values were converted from NHE to SCE using SCE = NHE - 0.25 V.<sup>10</sup> <sup>e</sup> Values taken from Ref<sup>41</sup> which were obtained in a 1:1 MeCN:H<sub>2</sub>O co-solvent. <sup>f</sup> Value taken from Ref<sup>42</sup>. <sup>g</sup> Value taken from Ref<sup>43</sup>. <sup>h</sup> Values taken from Ref<sup>7</sup>.



Table S11. Ground and excited state redox potentials and optical gaps of the eight PCs in the four solvents.<sup>a</sup>

|                                                                      |                       | THF   | DCM   | DMF   | MeCN                       |
|----------------------------------------------------------------------|-----------------------|-------|-------|-------|----------------------------|
| <b>[Ru(bpy)<sub>3</sub>](PF<sub>6</sub>)<sub>2</sub></b>             | E* <sub>ox</sub> / V  |       | -0.83 |       | -0.96 (-0.81) <sup>b</sup> |
|                                                                      | E* <sub>red</sub> / V |       | 0.98  | 0.90  | 0.84 (0.77) <sup>b</sup>   |
| <b>[Ir(ppy)<sub>2</sub>(dtbbpy)]PF<sub>6</sub></b>                   | E* <sub>ox</sub> / V  | -1.06 | -1.18 |       | -1.23 (-0.96) <sup>c</sup> |
|                                                                      | E* <sub>red</sub> / V | 1.11  | 0.98  | 1.01  | 0.93 (0.66) <sup>c</sup>   |
| <b>[Ir(dF(CF<sub>3</sub>)ppy)<sub>2</sub>(dtbbpy)]PF<sub>6</sub></b> | E* <sub>ox</sub> / V  |       | -0.90 |       | -1.05 (-0.89) <sup>c</sup> |
|                                                                      | E* <sub>red</sub> / V | 1.64  | 1.47  | 1.46  | 1.37 (1.21) <sup>c</sup>   |
| <b>[Cu(dmp)(xantphos)]PF<sub>6</sub></b>                             | E* <sub>ox</sub> / V  |       | -1.32 |       | -1.53/-1.42                |
|                                                                      | E* <sub>red</sub> / V | 0.98  | 0.90  | 1.04  | 0.94                       |
| <b>Eosin Y</b>                                                       | E* <sub>ox</sub> / V  |       |       | -1.62 | -1.68 (-1.11) <sup>d</sup> |
|                                                                      | E* <sub>red</sub> / V |       |       | 0.82  | 1.07 (0.83) <sup>d</sup>   |
| <b>4CzIPN</b>                                                        | E* <sub>ox</sub> / V  |       | -1.09 |       | -1.15 (-1.18) <sup>e</sup> |
|                                                                      | E* <sub>red</sub> / V | 1.46  | 1.39  | 1.40  | 1.41 (1.43) <sup>e</sup>   |
| <b>2CzPN</b>                                                         | E* <sub>ox</sub> / V  |       | -1.29 |       | -1.38 (-1.30) <sup>f</sup> |
|                                                                      | E* <sub>red</sub> / V | 1.51  | 1.38  | 1.39  | 1.33 (1.32) <sup>f</sup>   |
| <b>pDTCz-DPmS<sup>g</sup></b>                                        | E* <sub>ox</sub> / V  |       | -1.44 |       |                            |
|                                                                      | E* <sub>red</sub> / V | 1.32  | 1.34  | 1.48  |                            |

<sup>a</sup> Values are reported vs SCE. E\*<sub>ox</sub> = E<sub>ox</sub> - E<sub>0,0</sub> and E\*<sub>red</sub> = E<sub>red</sub> + E<sub>0,0</sub>. When no value is reported, this is due to poor solubility of the PC in that solvent or no redox wave was detected within the electrochemical window of the solvent. Values in parentheses are taken from the literature. <sup>b</sup> Value taken from Ref<sup>38</sup>. <sup>c</sup> Value taken from Ref<sup>39</sup>. <sup>d</sup> Values taken from Ref<sup>41</sup> which were obtained in a 1:1 MeCN:H<sub>2</sub>O co-solvent. <sup>e</sup> Value taken from Ref<sup>42</sup>. <sup>f</sup> Value taken from Ref<sup>43</sup>. <sup>g</sup> Values taken from Ref<sup>7</sup>.

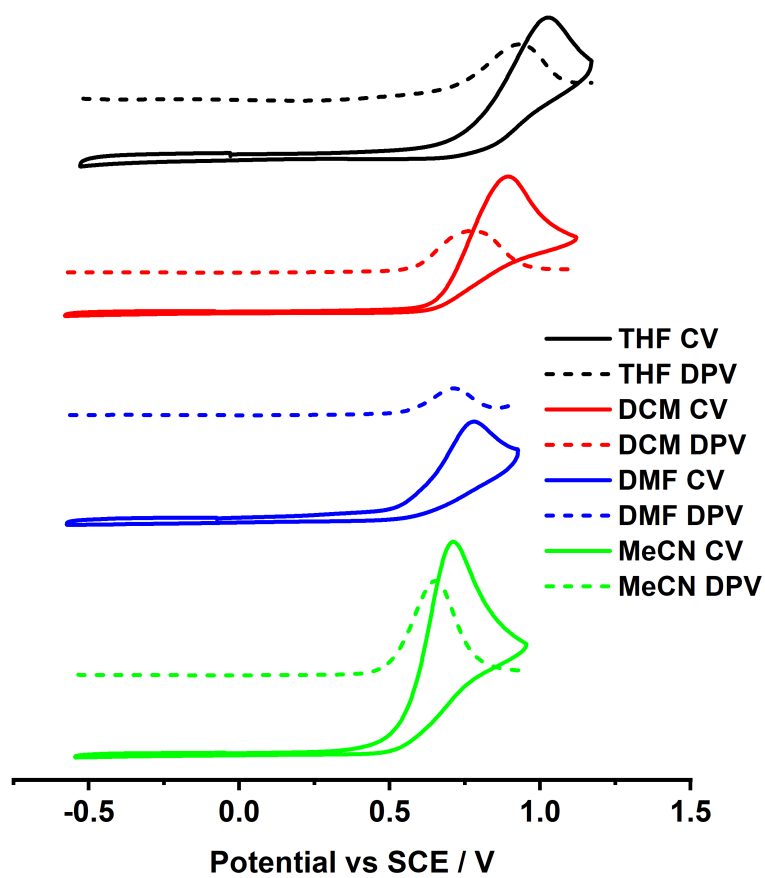

Figure S17. CV and DPV obtained for DIPEA in the various solvents at scan rate of 0.1 V s<sup>-1</sup>.

Table S12. Redox potentials obtained in the various solvents for DIPEA.

|                     | THF  | DCM  | DMF  | MeCN |
|---------------------|------|------|------|------|
| E <sub>ox</sub> / V | 0.93 | 0.77 | 0.72 | 0.65 |

## UV-Vis absorption spectra

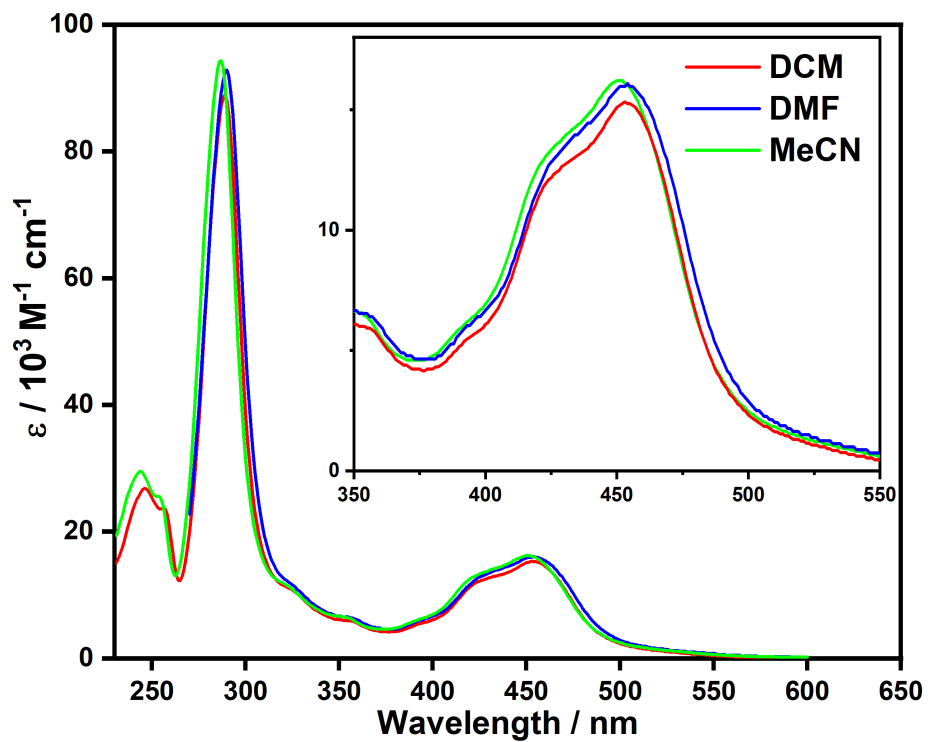

Figure S18. UV-vis absorption spectra of [Ru(bpy)<sub>3</sub>](PF<sub>6</sub>)<sub>2</sub> in the various solvents.

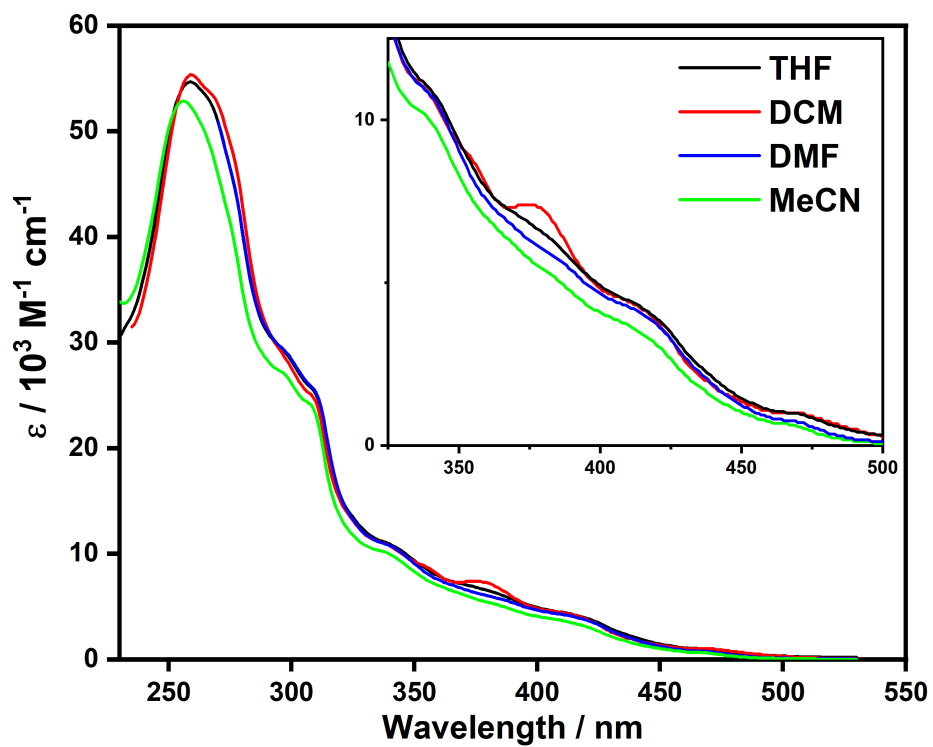

Figure S19. UV-vis absorption spectra of  $[\text{Ir}(\text{ppy})_2(\text{dtbbpy})]\text{PF}_6$  in the various solvents.

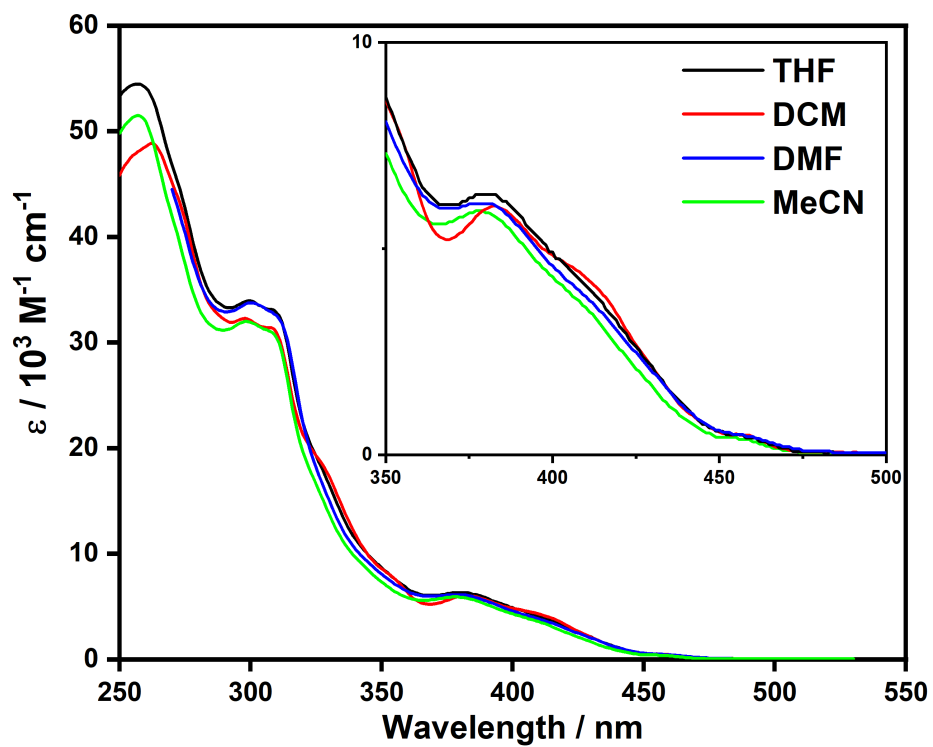

Figure S20. UV-vis absorption spectra of  $[\text{Ir}(\text{dF}(\text{CF}_3)\text{ppy})_2(\text{dtbbpy})]\text{PF}_6$  in the various solvents.

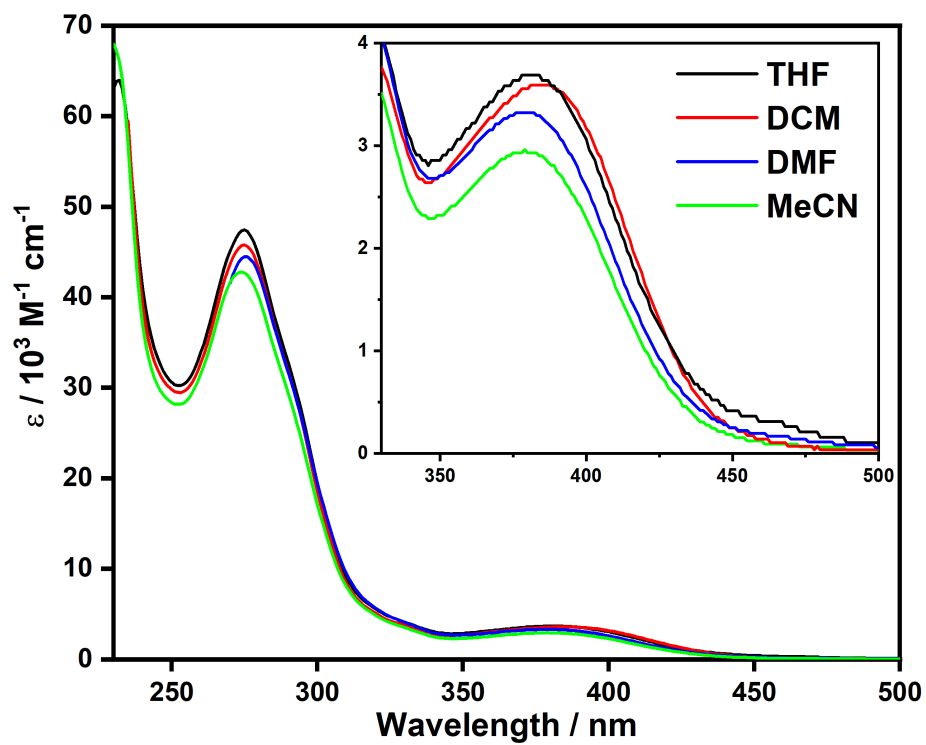

Figure S21. UV-vis absorption spectra of  $[\text{Cu}(\text{dmp})(\text{xantphos})\text{PF}_6]$  in the various solvents.

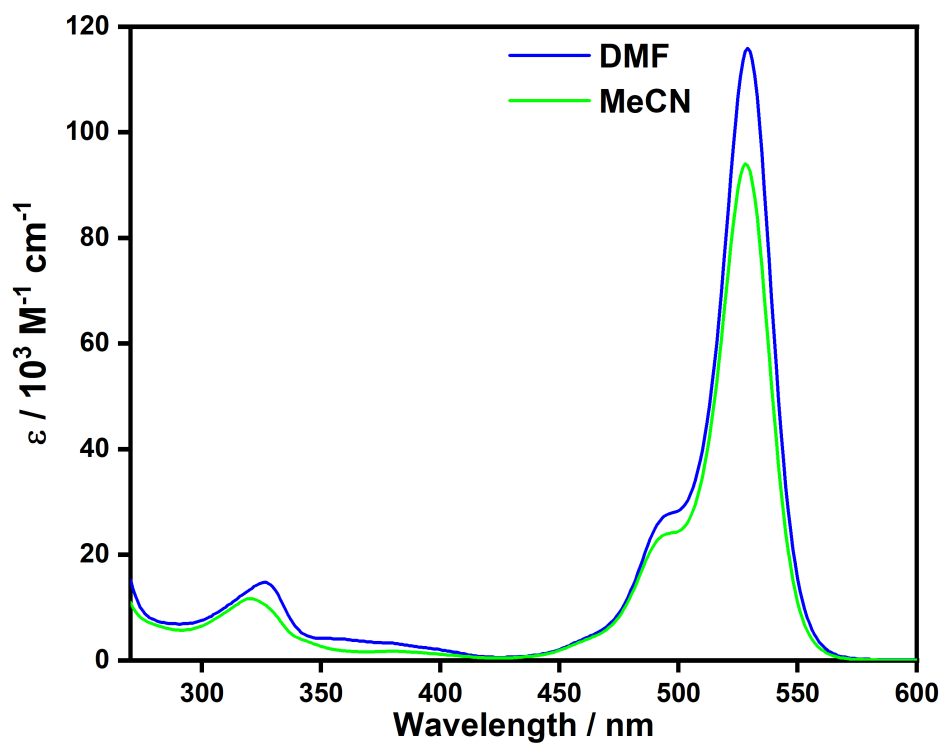

Figure S22. UV-vis absorption spectra of **Eosin Y** in the various solvents.

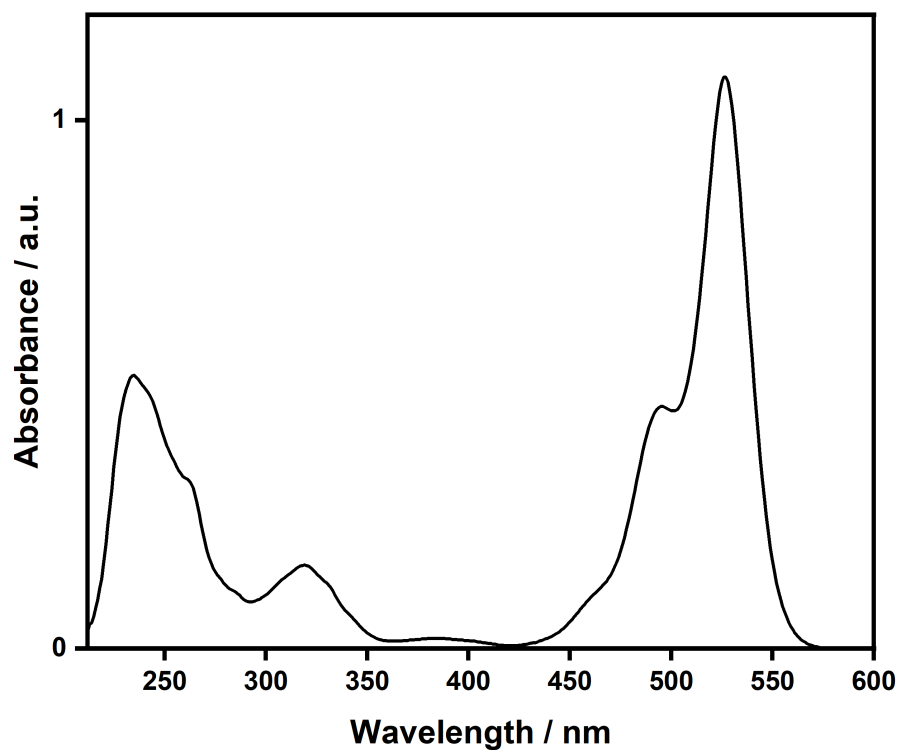

Figure S23. UV-vis absorption spectrum of **Eosin Y** in THF.

Due to poor solubility of **Eosin Y** in THF, accurate concentrations could not be determined. As such,  $\epsilon$  values are unknown. The UV-vis absorption spectrum of **Eosin Y** was measured in THF simply to confirm the presence of the same structural form of **Eosin Y** in each of THF, DMF and MeCN when comparing redox potentials (see main paper for further discussion).



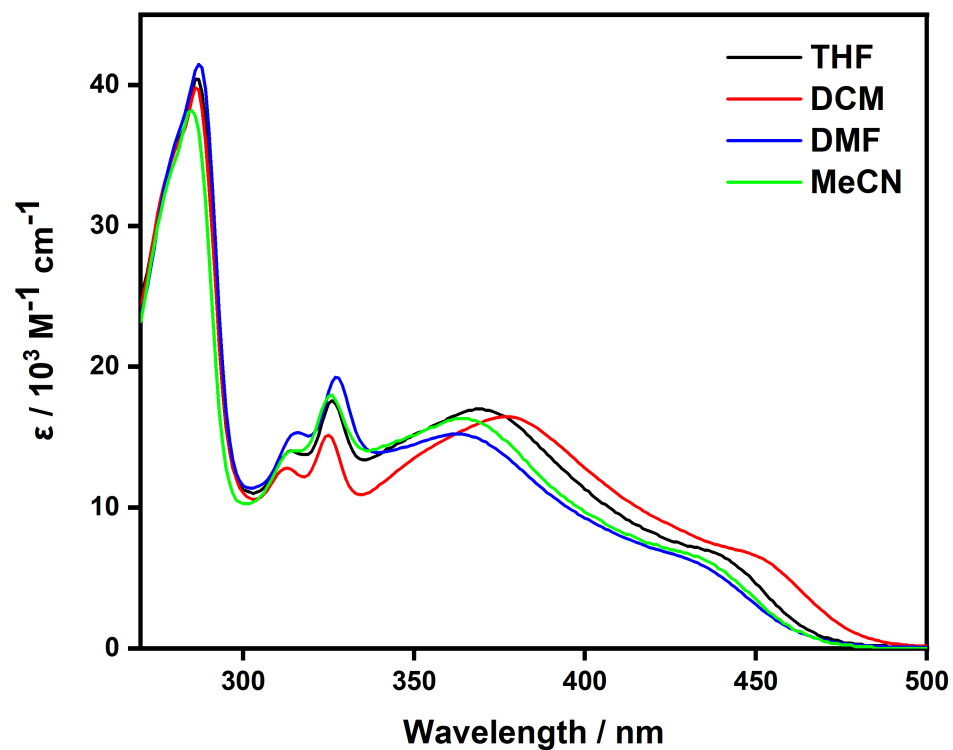

Figure S24. UV-vis absorption spectra of 4CzIPN in the various solvents. Spectra taken from Ref <sup>7</sup>.

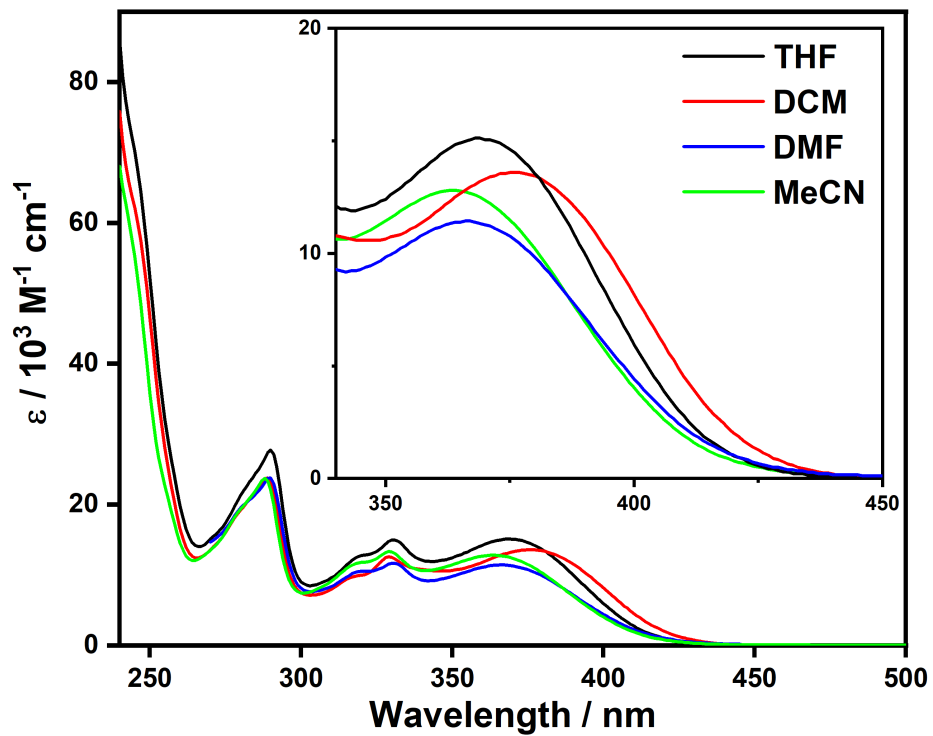

Figure S25. UV-vis absorption spectra of 2CzPN in the various solvents.

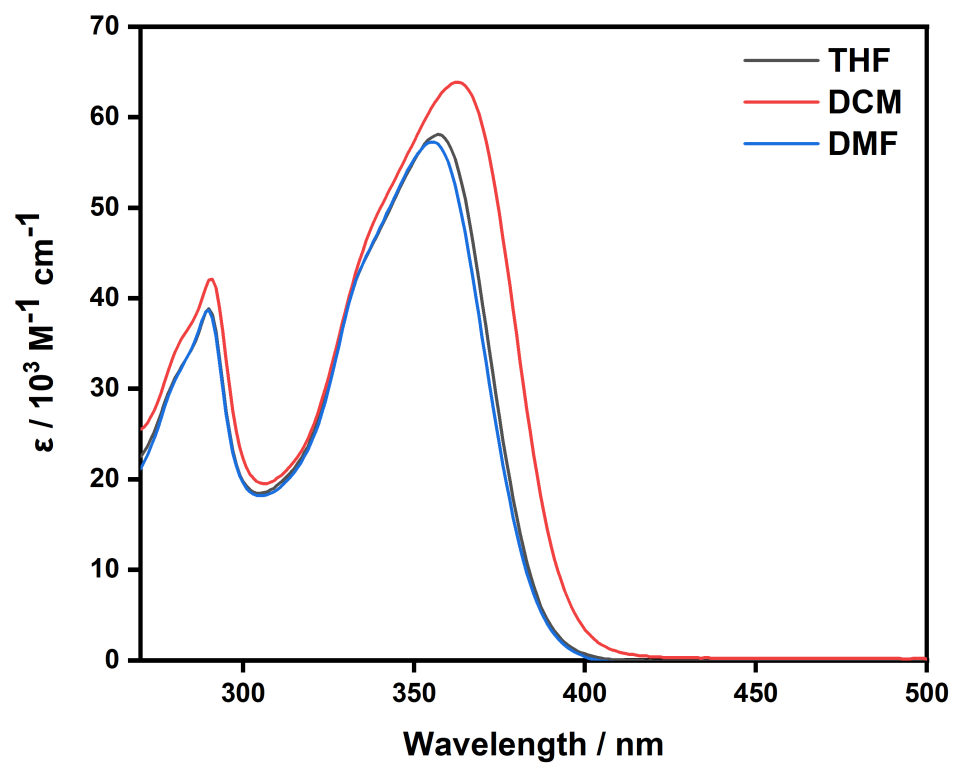

Figure S26. UV-vis absorption spectra of pDTCz-DPmS in the various solvents. Spectra taken from Ref<sup>7</sup>.

Table S13. Molar absorptivity values for some of the photocatalysts at 456 nm in the four solvents.<sup>a</sup>

|                                                                      | $\epsilon$ at 456 nm / $10^3 \text{ M}^{-1} \text{ cm}^{-1}$ |       |       |       |
|----------------------------------------------------------------------|--------------------------------------------------------------|-------|-------|-------|
|                                                                      | THF                                                          | DCM   | DMF   | MeCN  |
| <b>[Ru(bpy)<sub>3</sub>](PF<sub>6</sub>)<sub>2</sub></b>             |                                                              | 15.17 | 15.96 | 15.72 |
| <b>[Ir(ppy)<sub>2</sub>(dtbbpy)]PF<sub>6</sub></b>                   | 1.22                                                         | 1.16  | 0.99  | 0.80  |
| <b>[Ir(dF(CF<sub>3</sub>)ppy)<sub>2</sub>(dtbbpy)]PF<sub>6</sub></b> | 0.49                                                         | 0.48  | 0.50  | 0.37  |
| <b>[Cu(dmp)(xantphos)]PF<sub>6</sub></b>                             | 0.36                                                         | 0.18  | 0.20  | 0.12  |
| <b>Eosin Y</b>                                                       |                                                              |       | 3.28  | 2.98  |
| <b>4CzIPN</b>                                                        | 3.06                                                         | 5.71  | 1.99  | 2.18  |
| <b>2CzPN</b>                                                         | 0                                                            | 0     | 0.11  | 0.07  |

<sup>a</sup> Measurements performed at room temperature under air. When no value is reported, this is due to poor solubility of the PC in that solvent.

Table S14. Molar absorptivity values for some of the photocatalysts at 390 nm in the four solvents.<sup>a</sup>

|                                                                      | $\epsilon$ at 390 nm / $10^3 \text{ M}^{-1} \text{ cm}^{-1}$ |       |       |       |
|----------------------------------------------------------------------|--------------------------------------------------------------|-------|-------|-------|
|                                                                      | THF                                                          | DCM   | DMF   | MeCN  |
| <b>[Ru(bpy)<sub>3</sub>](PF<sub>6</sub>)<sub>2</sub></b>             |                                                              | 5.16  | 5.65  | 5.89  |
| <b>[Ir(dF(CF<sub>3</sub>)ppy)<sub>2</sub>(dtbbpy)]PF<sub>6</sub></b> | 5.82                                                         | 5.63  | 5.54  | 5.18  |
| <b>[Cu(dmp)(xantphos)]PF<sub>6</sub></b>                             | 3.53                                                         | 3.55  | 3.13  | 2.75  |
| <b>4CzIPN</b>                                                        | 13.57                                                        | 14.90 | 10.90 | 11.48 |

<sup>a</sup> Measurements performed at room temperature under air. When no value is reported, this is due to poor solubility of the PC in that solvent.

## Steady-state emission spectra

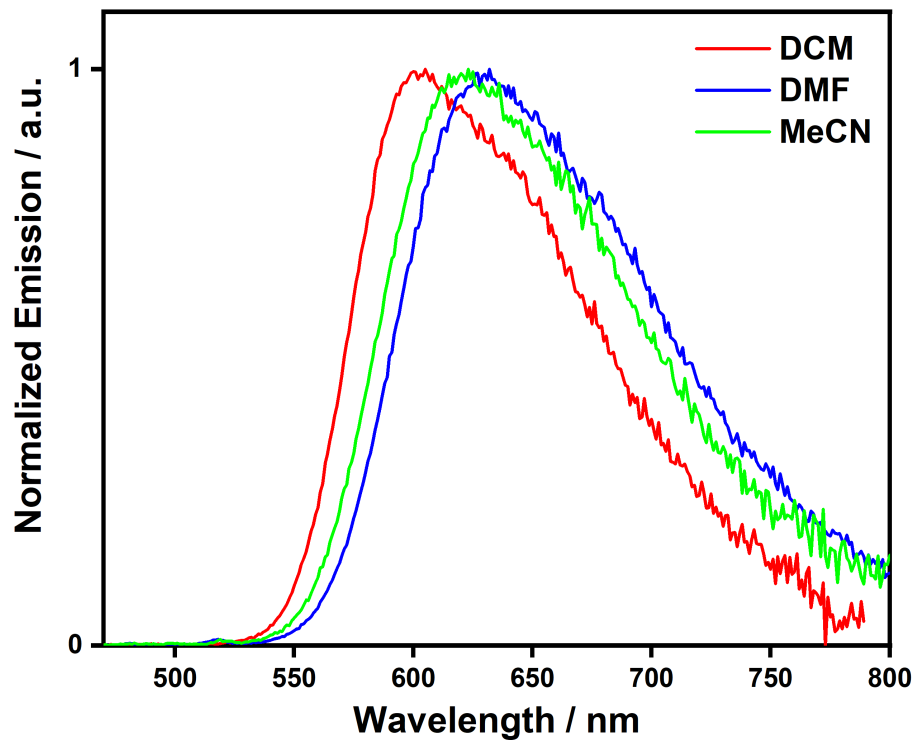

Figure S27. Steady-state emission spectra of [Ru(bpy)<sub>3</sub>](PF<sub>6</sub>)<sub>2</sub> obtained in the various solvents, where  $\lambda_{\text{exc}} = 450$  nm.

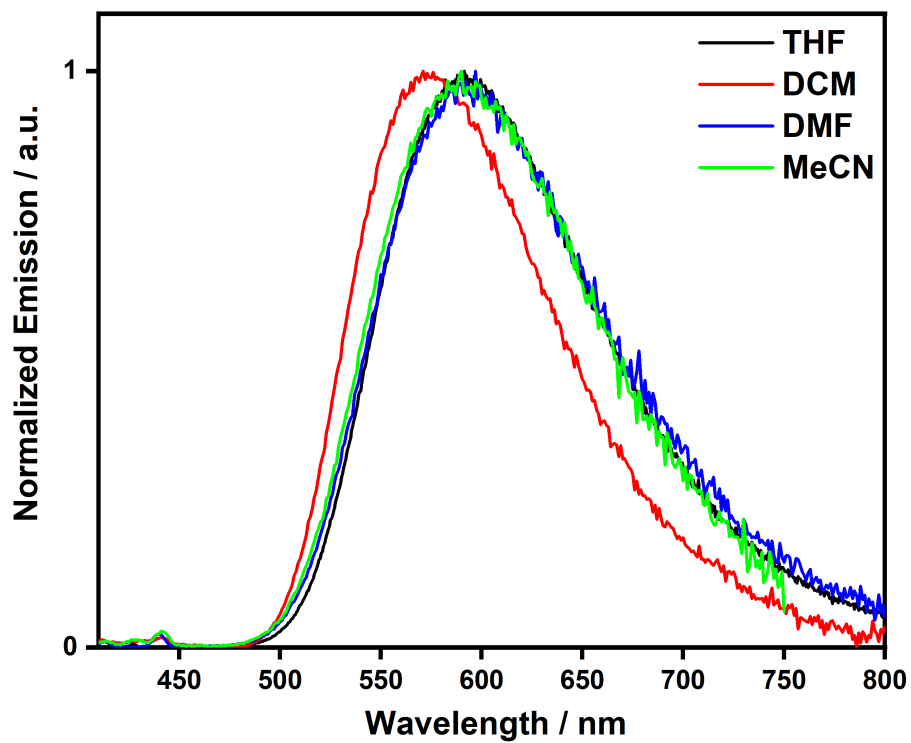

Figure S28. Steady-state emission spectra of  $[\text{Ir}(\text{ppy})_2(\text{dtbbpy})]\text{PF}_6$  obtained in the various solvents, where  $\lambda_{\text{exc}} = 380$  nm.

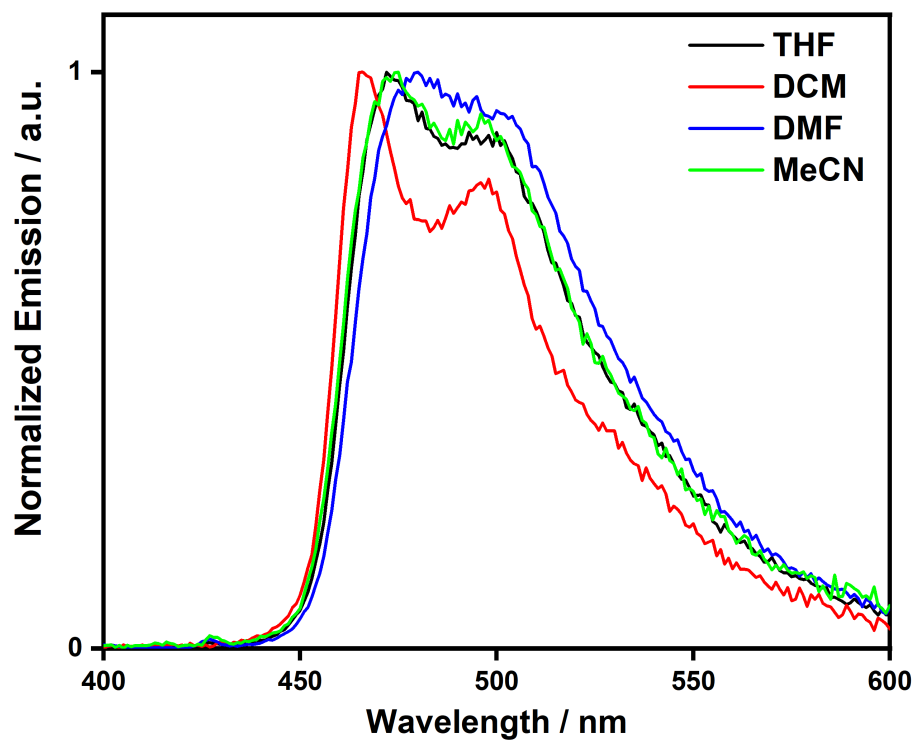

Figure S29. Steady-state emission spectra of  $[\text{Ir}(\text{dF}(\text{CF}_3)\text{ppy})_2(\text{dtbbpy})]\text{PF}_6$  obtained in the various solvents, where  $\lambda_{\text{exc}} = 380$  nm.

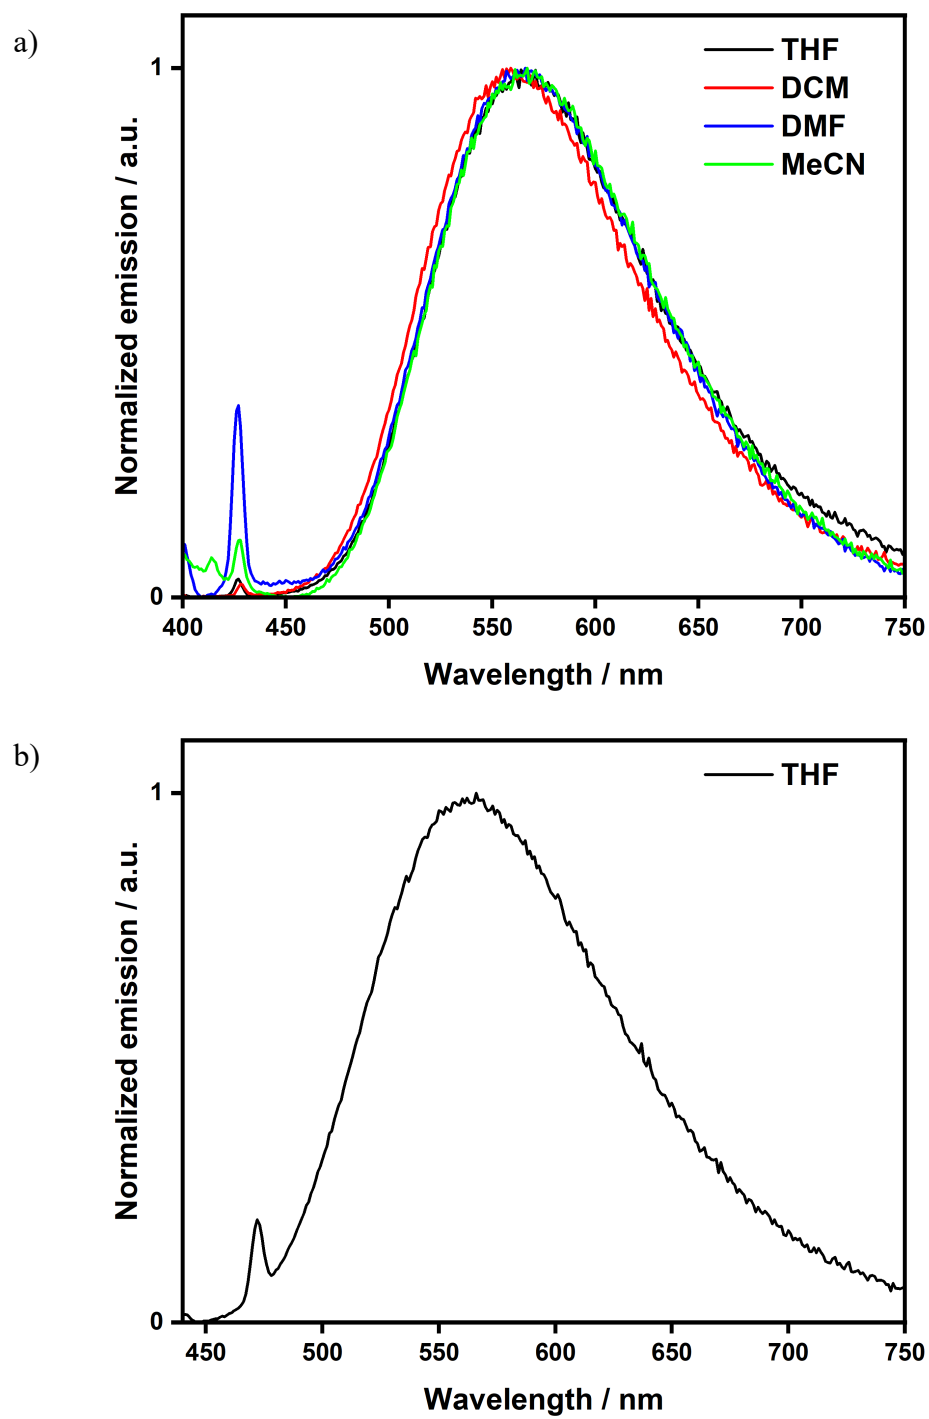

Figure S30. Steady-state emission spectra of  $[\text{Cu}(\text{dmp})(\text{xantphos})]\text{PF}_6$  a) obtained in the various solvents, where  $\lambda_{\text{exc}} = 380$  nm and b) obtained in THF, where  $\lambda_{\text{exc}} = 415$  nm.



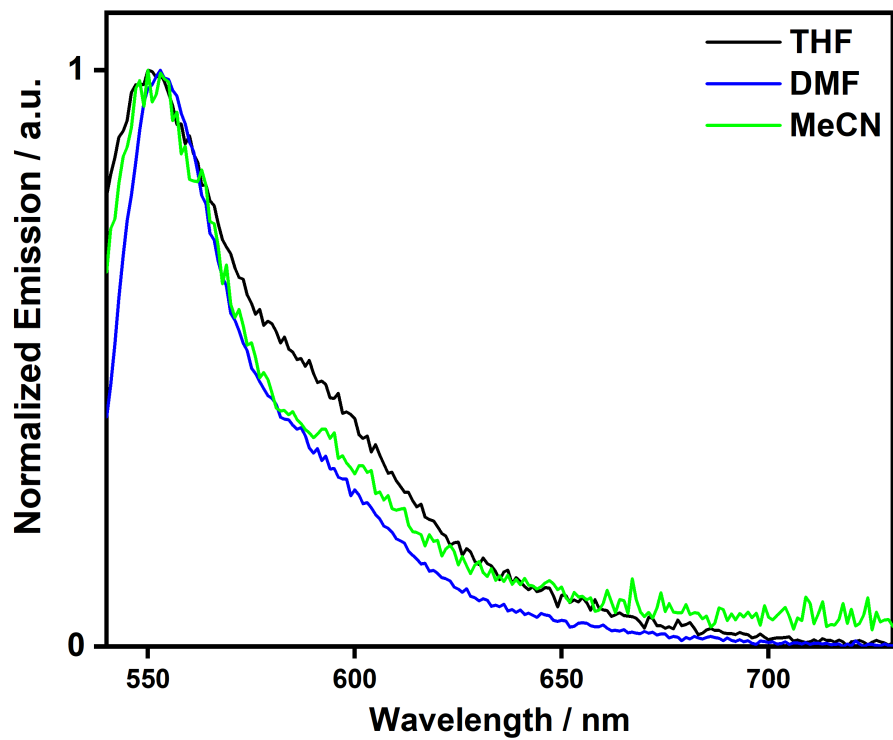

Figure S31. Steady-state emission spectra of **Eosin Y** obtained in the various solvents, where  $\lambda_{\text{exc}} = 520$  nm.

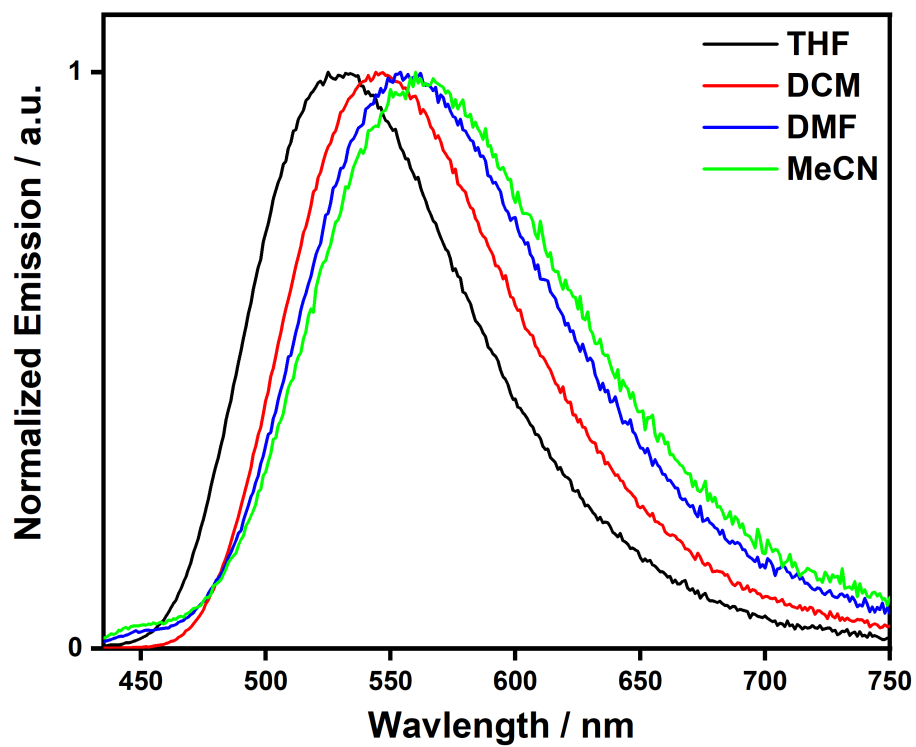

Figure S32. Steady-state emission spectra of 4CzIPN obtained in the various solvents, where  $\lambda_{\text{exc}} = 420$  nm. Spectra taken from Ref<sup>7</sup>.

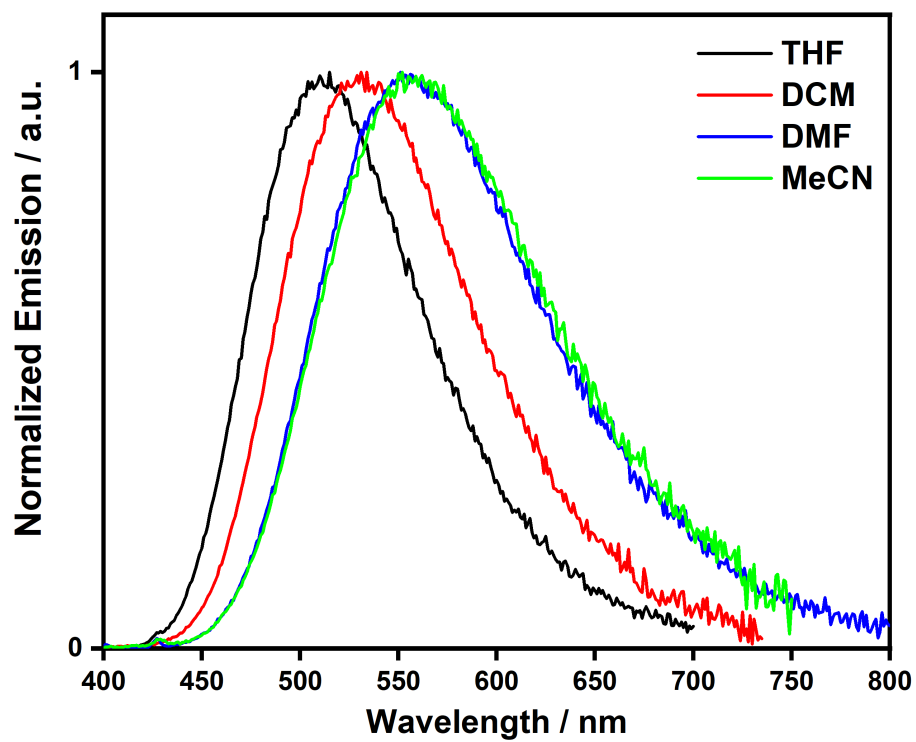

Figure S33. Steady-state emission spectra of **2CzPN** obtained in the various solvents, where  $\lambda_{\text{exc}} = 380$  nm.

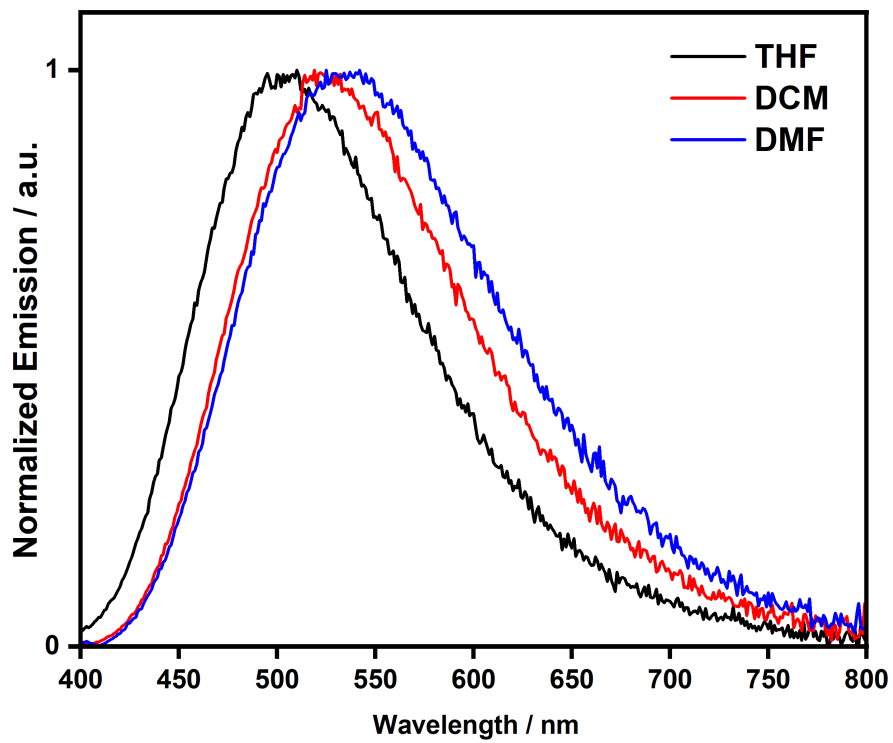

Figure S34. Steady-state emission spectra of **pDTCz-DPmS** obtained in the various solvents, where  $\lambda_{\text{exc}} = 360$  nm. Spectra taken from Ref<sup>7</sup>.

Table S15. Absorption and emission maxima for the eight PCs across the four solvents.<sup>a</sup>

|                                                                      |                                                                                      | THF                      | DCM                      | DMF                      | MeCN                     |
|----------------------------------------------------------------------|--------------------------------------------------------------------------------------|--------------------------|--------------------------|--------------------------|--------------------------|
| <b>[Ru(bpy)<sub>3</sub>](PF<sub>6</sub>)<sub>2</sub></b>             | $\lambda_{\text{abs}} [\epsilon] / \text{nm} [10^{-3} \text{M}^{-1} \text{cm}^{-1}]$ |                          | 453 [16]                 | 454 [16]                 | 450 [16]                 |
|                                                                      | $\lambda_{\text{PL}} / \text{nm}$                                                    |                          | 605                      | 632                      | 623 (615) <sup>c</sup>   |
| <b>[Ir(ppy)<sub>2</sub>(dtbbpy)]PF<sub>6</sub></b>                   | $\lambda_{\text{abs}} [\epsilon] / \text{nm} [10^{-3} \text{M}^{-1} \text{cm}^{-1}]$ | 470 [0.84],<br>417 [4.1] | 470 [0.87],<br>417 [3.9] | 469 [0.67],<br>417 [3.7] | 466 [0.63],<br>417 [3.2] |
|                                                                      | $\lambda_{\text{PL}} / \text{nm}$                                                    | 592                      | 571                      | 597                      | 590 (591) <sup>c</sup>   |
| <b>[Ir(dF(CF<sub>3</sub>)ppy)<sub>2</sub>(dtbbpy)]PF<sub>6</sub></b> | $\lambda_{\text{abs}} [\epsilon] / \text{nm} [10^{-3} \text{M}^{-1} \text{cm}^{-1}]$ | 379 [6.7]                | 415 [3.9],<br>382 [6.0]  | 378 [6.0]                | 379 [5.6]                |
|                                                                      | $\lambda_{\text{PL}} / \text{nm}$                                                    | 472                      | 466                      | 480                      | 475 (470) <sup>f</sup>   |
| <b>[Cu(dmp)(xantphos)]PF<sub>6</sub></b>                             | $\lambda_{\text{abs}} [\epsilon] / \text{nm} [10^{-3} \text{M}^{-1} \text{cm}^{-1}]$ | 382 [3.8]                | 383 [3.4]                | 379 [3.3]                | 379 [3.2]                |
|                                                                      | $\lambda_{\text{PL}} / \text{nm}$                                                    | 567                      | 559                      | 566                      | 567 (545) <sup>h</sup>   |
| <b>Eosin Y</b>                                                       | $\lambda_{\text{abs}} [\epsilon] / \text{nm} [10^{-3} \text{M}^{-1} \text{cm}^{-1}]$ |                          |                          | 529 [110]                | 528 [97]                 |
|                                                                      | $\lambda_{\text{PL}} / \text{nm}$                                                    | 550                      |                          | 553                      | 550 (537) <sup>g</sup>   |
| <b>4CzIPN</b>                                                        | $\lambda_{\text{abs}} [\epsilon] / \text{nm} [10^{-3} \text{M}^{-1} \text{cm}^{-1}]$ | 438 [6.8]                | 448 [5.9-<br>6.5]        | 428 [6.2]                | 434 [6.8]                |
|                                                                      | $\lambda_{\text{PL}} / \text{nm}$                                                    | 525                      | 544                      | 554                      | 560 (565) <sup>d</sup>   |
| <b>2CzPN</b>                                                         | $\lambda_{\text{abs}} [\epsilon] / \text{nm} [10^{-3} \text{M}^{-1} \text{cm}^{-1}]$ | 368 [15]                 | 376 [14-16]              | 366 [11]                 | 363 [13-15]              |
|                                                                      | $\lambda_{\text{PL}} / \text{nm}$                                                    | 515                      | 531                      | 551                      | 552 (560) <sup>d</sup>   |
| <b>pDTCz-DPmS<sup>b</sup></b>                                        | $\lambda_{\text{abs}} [\epsilon] / \text{nm} [10^{-3} \text{M}^{-1} \text{cm}^{-1}]$ | 357 [62]                 | 363 [60]                 | 355 [56]                 |                          |
|                                                                      | $\lambda_{\text{PL}} / \text{nm}$                                                    | 505                      | 524                      | 535                      | 546                      |

<sup>a</sup> Measurements performed at room temperature under air. Absorption maxima reported for the lowest energy absorption band. When no value is reported, this is due to poor solubility of the PC in that solvent.  $\lambda_{\text{exc}} = 450 \text{ nm}$  for **[Ru(bpy)<sub>3</sub>](PF<sub>6</sub>)<sub>2</sub>**,  $390 \text{ nm}$  for **[Ir(ppy)<sub>2</sub>(dtbbpy)]PF<sub>6</sub>**,  $380 \text{ nm}$  for **[Ir(dF(CF<sub>3</sub>)ppy)<sub>2</sub>(dtbbpy)]PF<sub>6</sub>** and **[Cu(dmp)(xantphos)]PF<sub>6</sub>** and **2CzPN**,  $520 \text{ nm}$  for **Eosin Y**,  $420 \text{ nm}$  for **4CzIPN** and  $360 \text{ nm}$  for **pDTCz-DPmS**. <sup>b</sup> Values taken from Ref<sup>7</sup>. <sup>c</sup> Value taken from Ref<sup>44</sup>. <sup>d</sup> Value taken from Ref<sup>45</sup>. <sup>e</sup> Value taken from Ref<sup>46</sup>. <sup>f</sup> Value taken from Ref<sup>39</sup>. <sup>g</sup> Value taken from Ref<sup>47</sup> which was obtained in H<sub>2</sub>O. <sup>h</sup> Value taken from Ref<sup>40</sup>.

## Optical gap determination

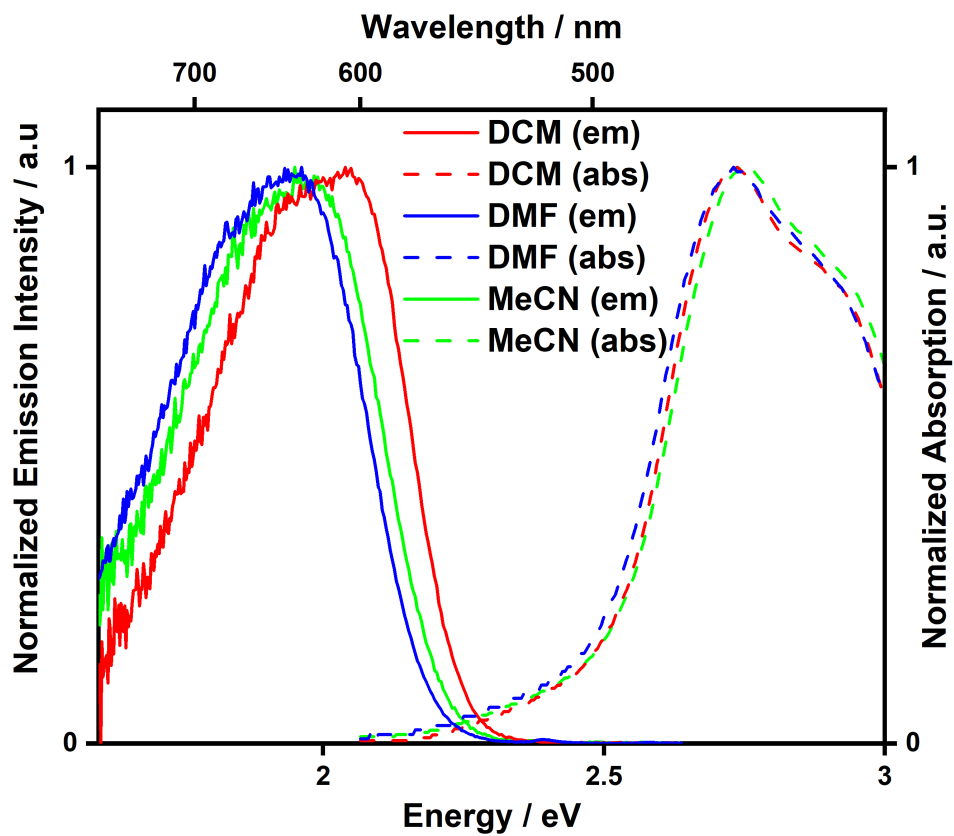

Figure S35. Optical gap determination for  $[\text{Ru}(\text{bpy})_3](\text{PF}_6)_2$  in various solvents.

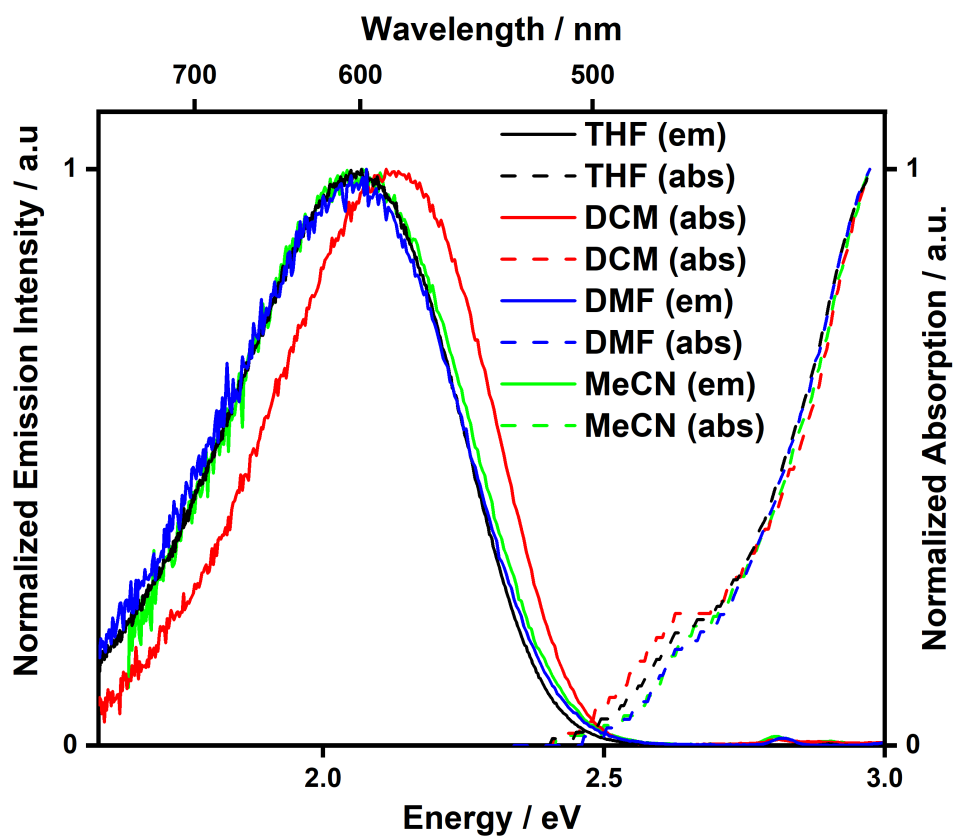

Figure S36. Optical gap determination for  $[\text{Ir}(\text{ppy})_2(\text{dtbbpy})]\text{PF}_6$  in various solvents.

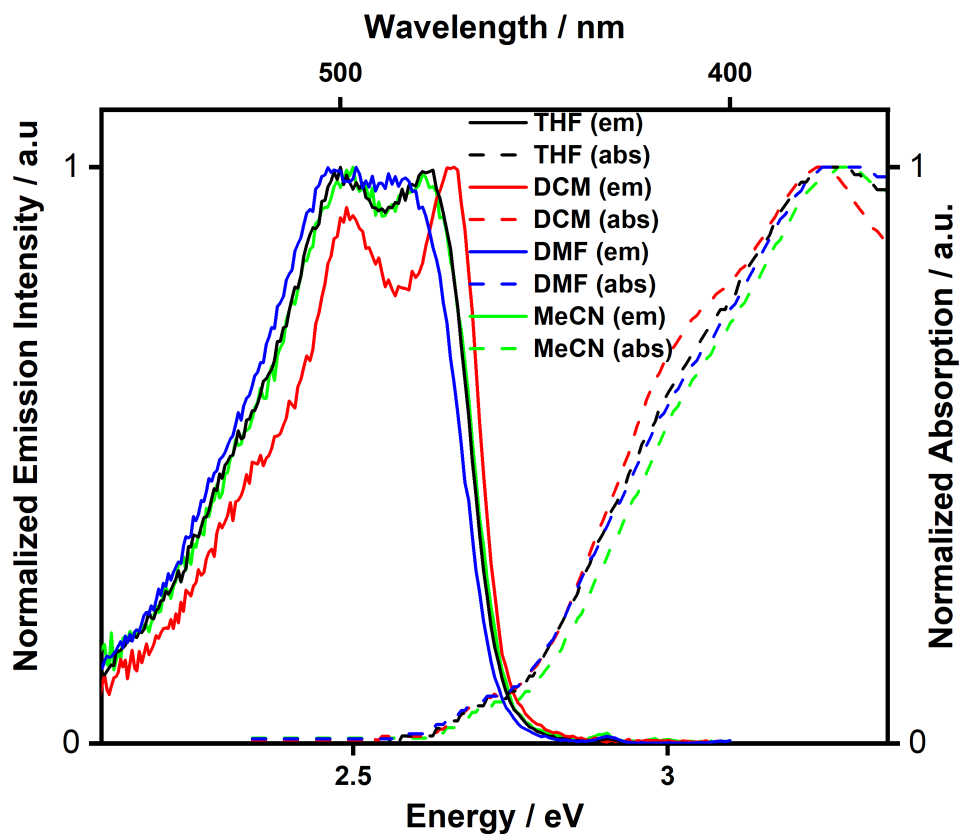

Figure S37. Optical gap determination for  $[\text{Ir}(\text{dF}(\text{CF}_3)\text{ppy})_2(\text{dtbbpy})]\text{PF}_6$  in various solvents.



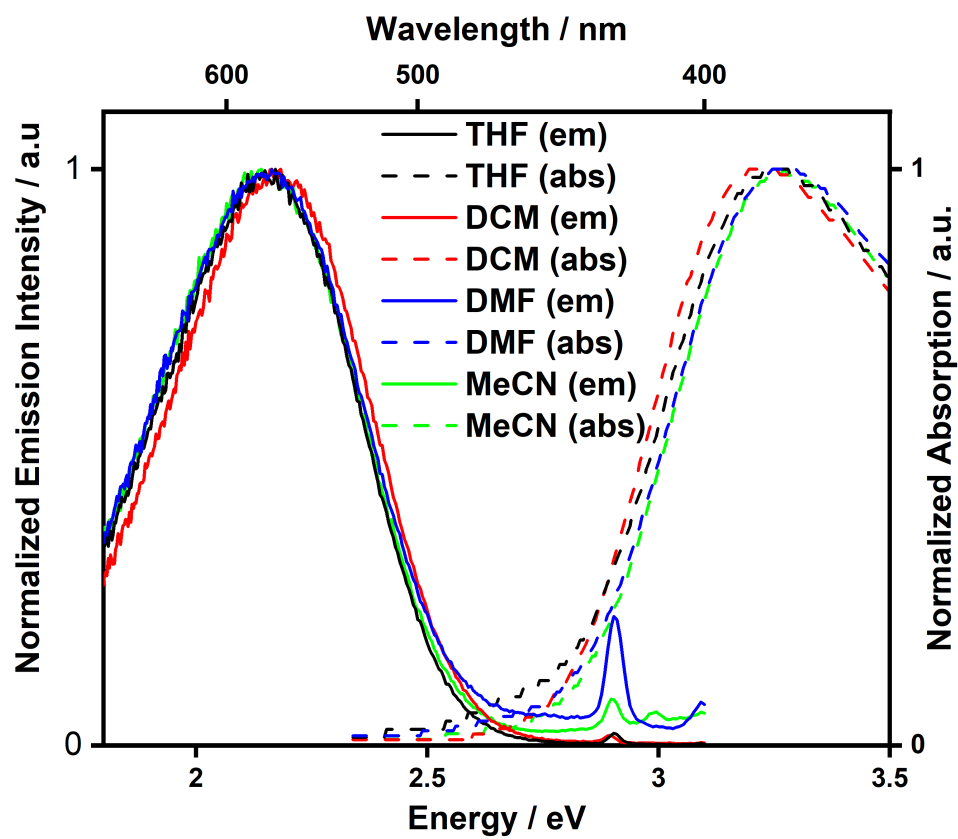

Figure S38. Optical gap determination for [Cu(dmp)(xantphos)]PF<sub>6</sub> in various solvents.

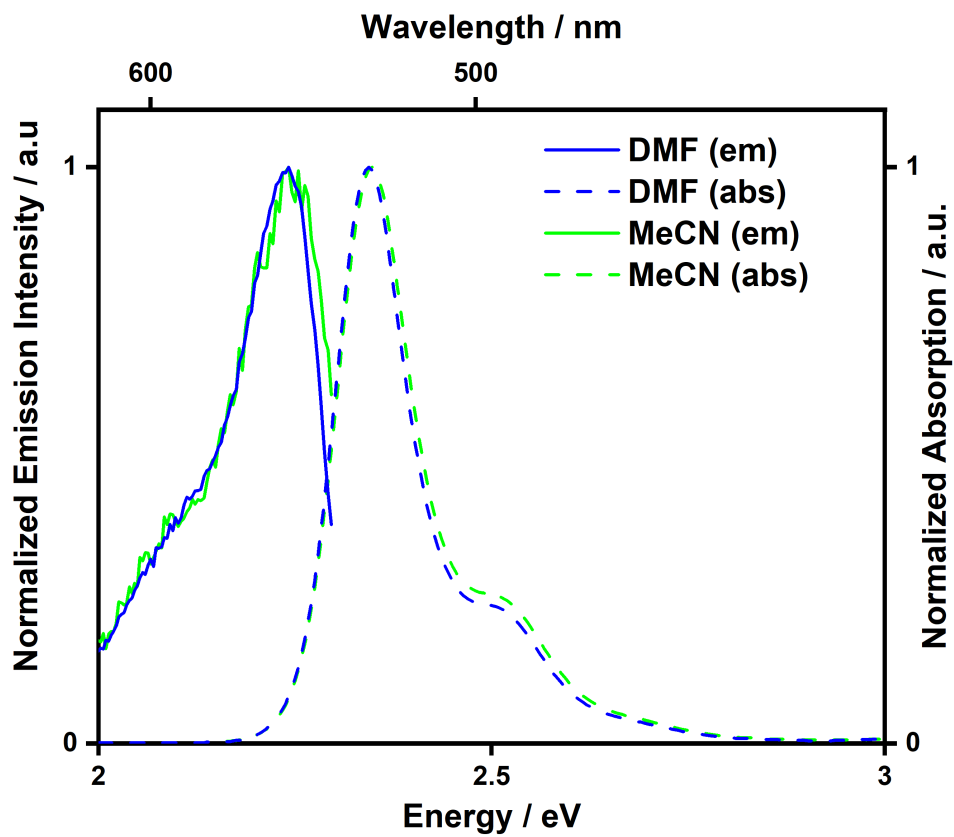

Figure S39. Optical gap determination for **Eosin Y** in various solvents.

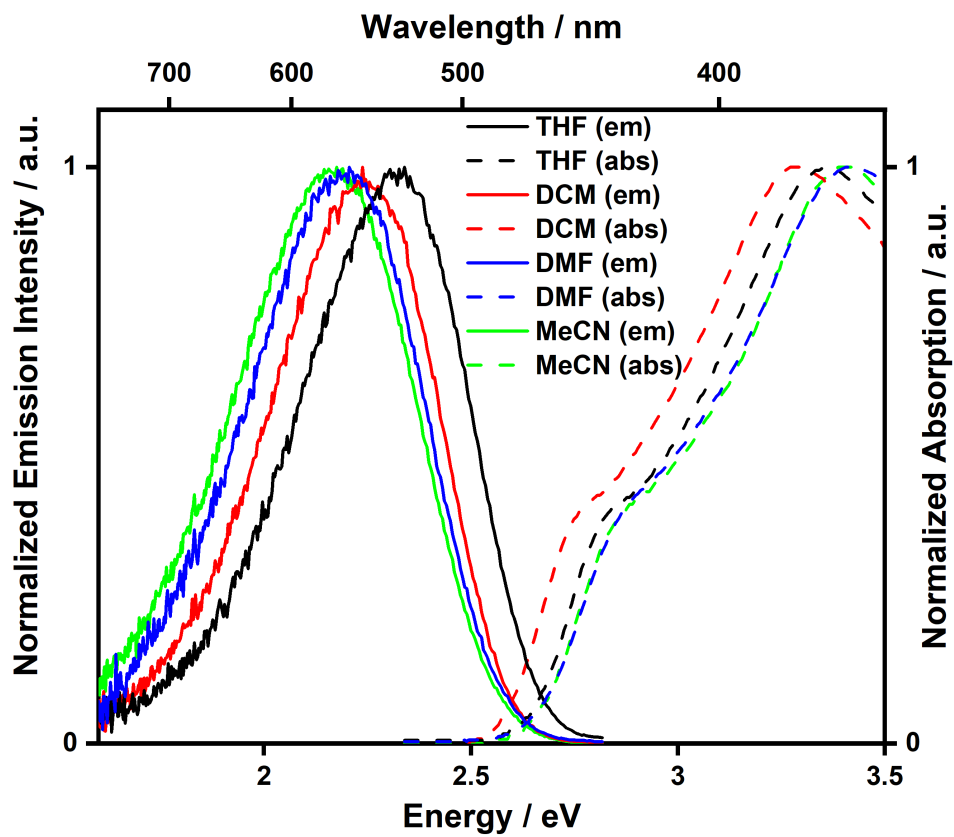

Figure S40. Optical gap determination for 4CzIPN in various solvents.

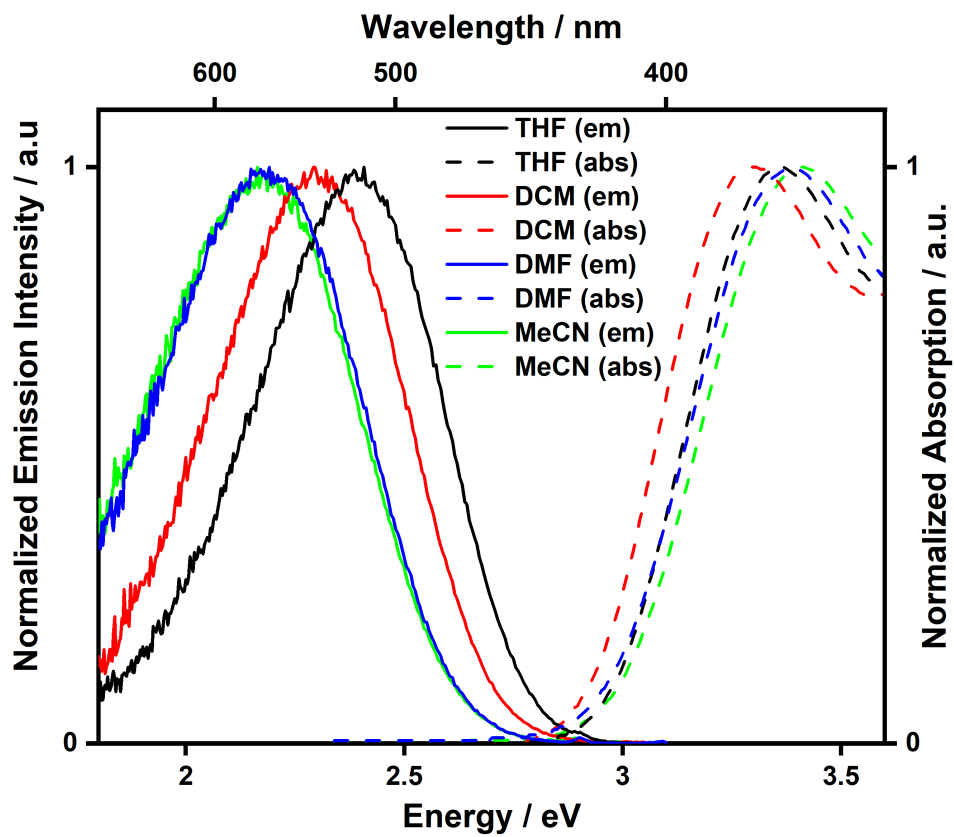

Figure S41. Optical gap determination for 2CzPN in various solvents.

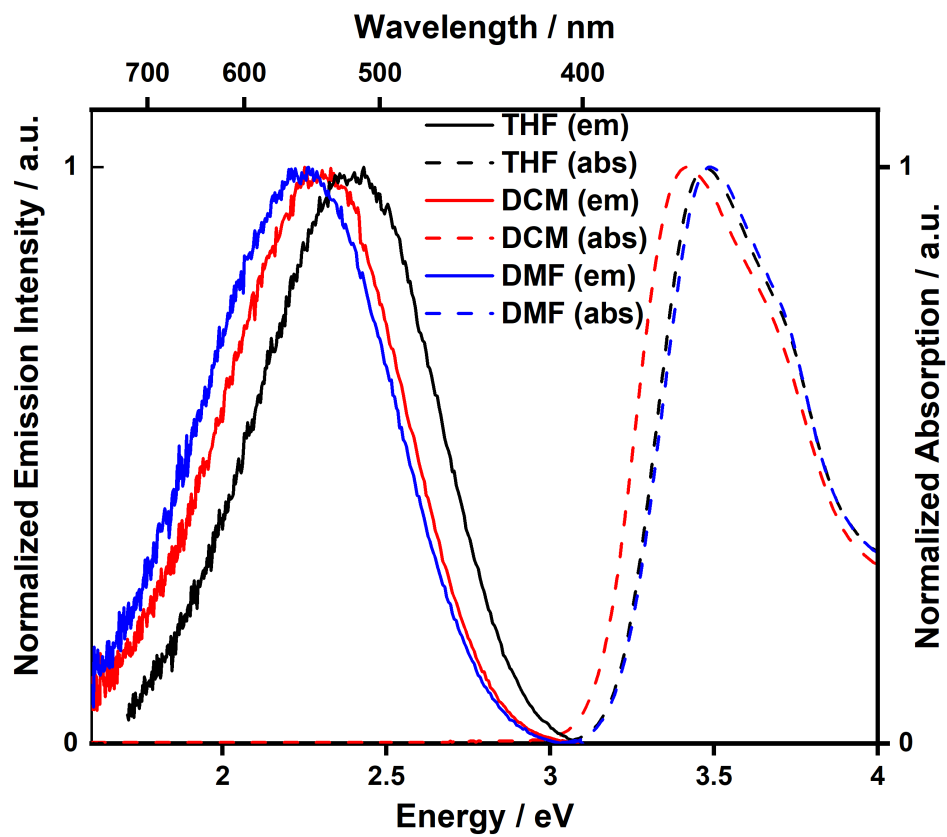

Figure S42. Optical gap determination for pDTCz-DPmS in various solvents.

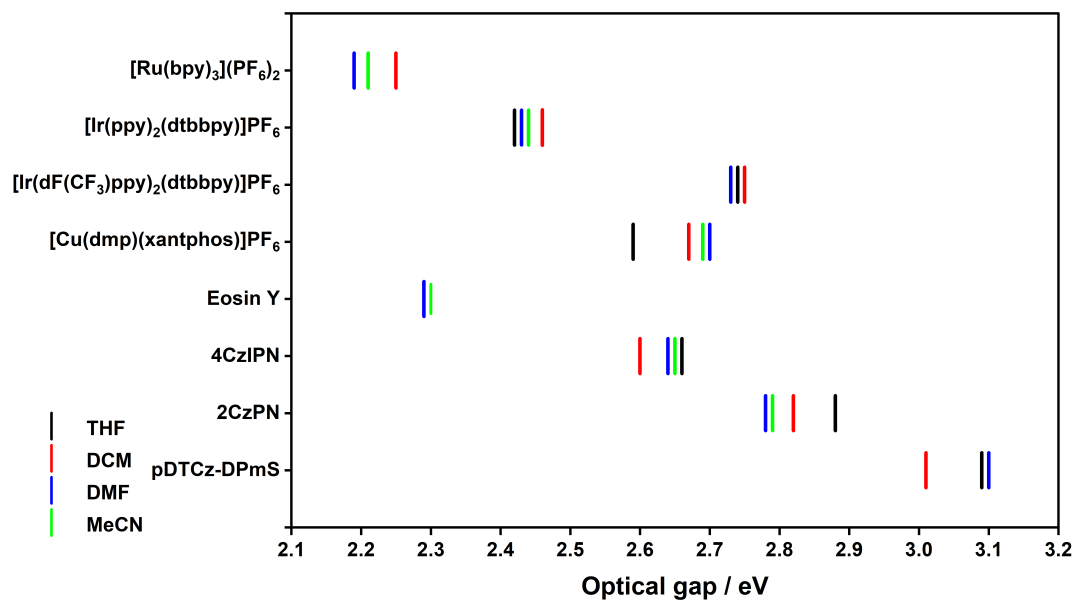

Figure S43. Variation of optical gap with solvent for the eight PCs.

Table S16. Experimental optical gaps and calculated S<sub>1</sub> and T<sub>1</sub> energies of the eight PCs in the four different solvents.<sup>a</sup>

|                                                                    |                                         | THF  | DCM  | DMF  | MeCN                     |
|--------------------------------------------------------------------|-----------------------------------------|------|------|------|--------------------------|
| <b>[Ru(bpy)<sub>3</sub>]<sup>2+</sup></b>                          | E <sub>0,0</sub> (T <sub>1</sub> ) / eV |      | 2.25 | 2.19 | 2.21                     |
|                                                                    | S <sub>1</sub> / eV                     | 2.63 | 2.64 | 2.63 | 2.63                     |
|                                                                    | T <sub>1</sub> / eV                     | 1.95 | 1.95 | 1.92 | 1.92                     |
| <b>[Ir(ppy)<sub>2</sub>(dtbbpy)]<sup>+</sup></b>                   | E <sub>0,0</sub> (T <sub>1</sub> ) / eV | 2.42 | 2.46 | 2.43 | 2.44                     |
|                                                                    | S <sub>1</sub> / eV                     | 2.56 | 2.58 | 2.65 | 2.65                     |
|                                                                    | T <sub>1</sub> / eV                     | 2.13 | 2.13 | 2.15 | 2.15                     |
| <b>[Ir(dF(CF<sub>3</sub>)ppy)<sub>2</sub>(dtbbpy)]<sup>+</sup></b> | E <sub>0,0</sub> (T <sub>1</sub> ) / eV | 2.74 | 2.75 | 2.73 | 2.74                     |
|                                                                    | S <sub>1</sub> / eV                     | 2.99 | 3.00 | 3.06 | 3.06                     |
|                                                                    | T <sub>1</sub> / eV                     | 2.42 | 2.43 | 2.42 | 2.58                     |
| <b>[Cu(dmp)(xantphos)]<sup>+</sup></b>                             | E <sub>0,0</sub> (S <sub>1</sub> ) / eV | 2.59 | 2.67 | 2.70 | 2.69                     |
|                                                                    | S <sub>1</sub> / eV                     | 2.91 | 2.92 | 2.95 | 2.95                     |
|                                                                    | T <sub>1</sub> / eV                     | 1.72 | 1.80 | 1.79 | 1.79                     |
| <b>Eosin Y</b>                                                     | E <sub>0,0</sub> (S <sub>1</sub> ) / eV |      |      | 2.29 | 2.30 <sup>b</sup>        |
|                                                                    | S <sub>1</sub> / eV                     | 4.35 | 4.35 | 4.36 | 4.36                     |
|                                                                    | T <sub>1</sub> / eV                     | 3.07 | 3.07 | 3.06 | 3.06                     |
| <b>4CzIPN</b>                                                      | E <sub>0,0</sub> (S <sub>1</sub> ) / eV | 2.66 | 2.60 | 2.64 | 2.65 (2.67) <sup>c</sup> |
|                                                                    | S <sub>1</sub> / eV                     | 2.67 | 2.67 | 2.68 | 2.68                     |
|                                                                    | T <sub>1</sub> / eV                     | 2.15 | 2.11 | 2.09 | 2.11                     |
| <b>2CzPN</b>                                                       | E <sub>0,0</sub> (S <sub>1</sub> ) / eV | 2.88 | 2.82 | 2.78 | 2.79                     |
|                                                                    | S <sub>1</sub> / eV                     | 2.91 | 2.92 | 2.92 | 2.92                     |
|                                                                    | T <sub>1</sub> / eV                     | 2.18 | 2.18 | 2.14 | 2.14                     |
| <b>pDTCz-DPmS</b>                                                  | E <sub>0,0</sub> (S <sub>1</sub> )      | 3.09 | 3.01 | 3.10 |                          |
|                                                                    | S <sub>1</sub> / eV                     | 3.51 | 3.51 | 3.52 | 3.52                     |
|                                                                    | T <sub>1</sub> / eV                     | 2.75 | 2.51 | 2.71 | 2.71                     |

<sup>a</sup>The level of theory used was PBE0/6-31G\*\*/GD3BJ for organic PCs and B3LYP/6-31+G\*\*/SBKJC-VDZ-ECP/GD3BJ for organometallic PCs. S<sub>1</sub> energies were calculated at the TD-DFT level using a state specific solvent correction for the S<sub>1</sub> state<sup>27</sup> and a non-equilibrated solvent environment. T<sub>1</sub> energies were calculated at the vertical delta-SCF level using a fully equilibrated solvent environment. <sup>b</sup> E<sub>0,0</sub> determined by the average of the onsets of the absorption and emission spectra. <sup>c</sup> Value taken from Ref<sup>42</sup>.

## RT steady-state PL and 77 K emission spectra

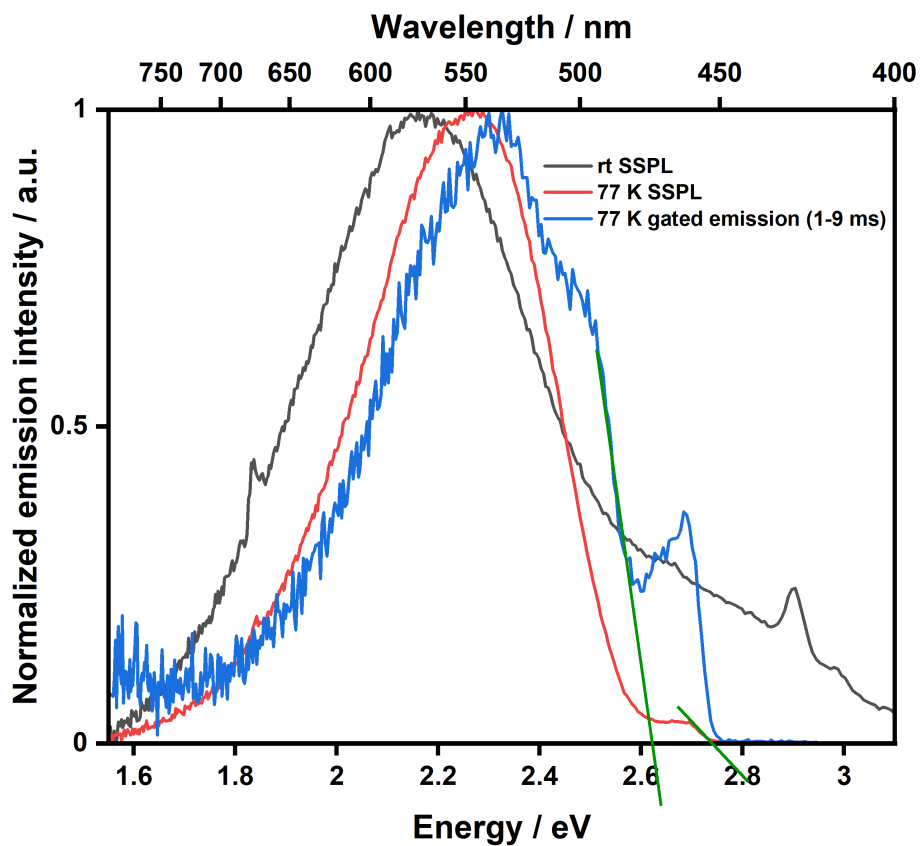

Figure S44. Steady-state emission spectra obtained for  $[\text{Cu}(\text{dmp})(\text{xantphos})]\text{PF}_6$  in BuCN at room temperature and 77 K, and gated emission spectrum at 77 K, employing a 1 - 9 ms time window. In all cases  $\lambda_{\text{exc}} = 380$  nm.



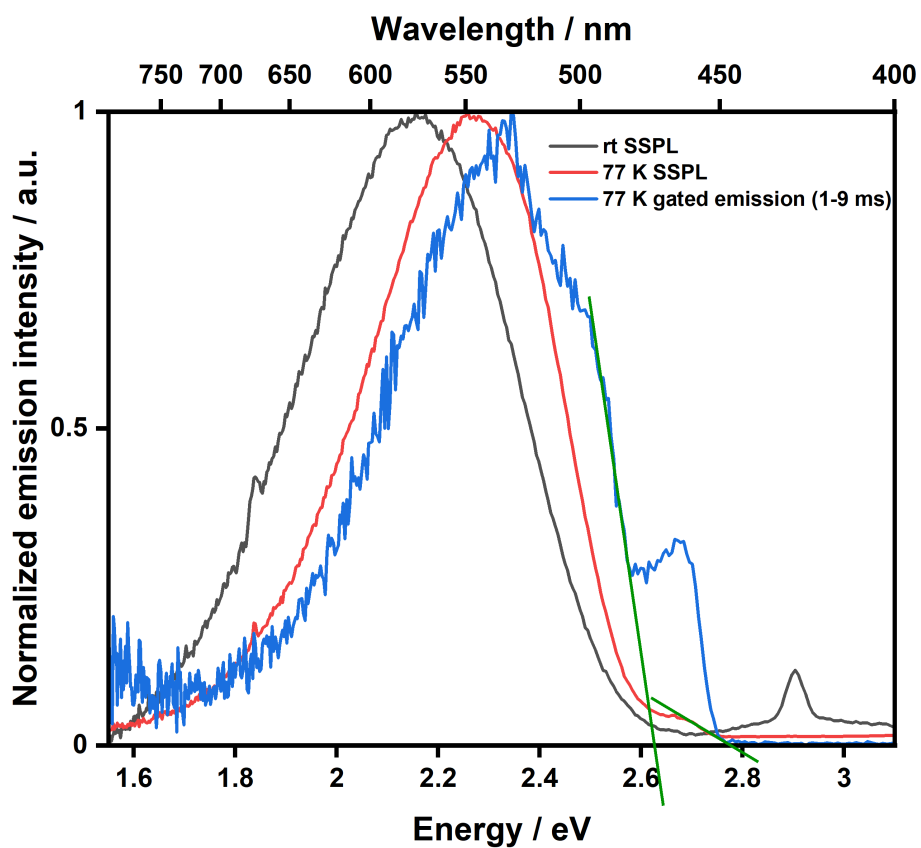

Figure S45. Steady-state emission spectra obtained for  $[\text{Cu}(\text{dmp})(\text{xantphos})]\text{PF}_6$  in 2-MeTHF at room temperature and 77 K, and gated emission spectrum at 77 K, employing a 1 - 9 ms time window. In all cases  $\lambda_{\text{exc}} = 380$  nm.

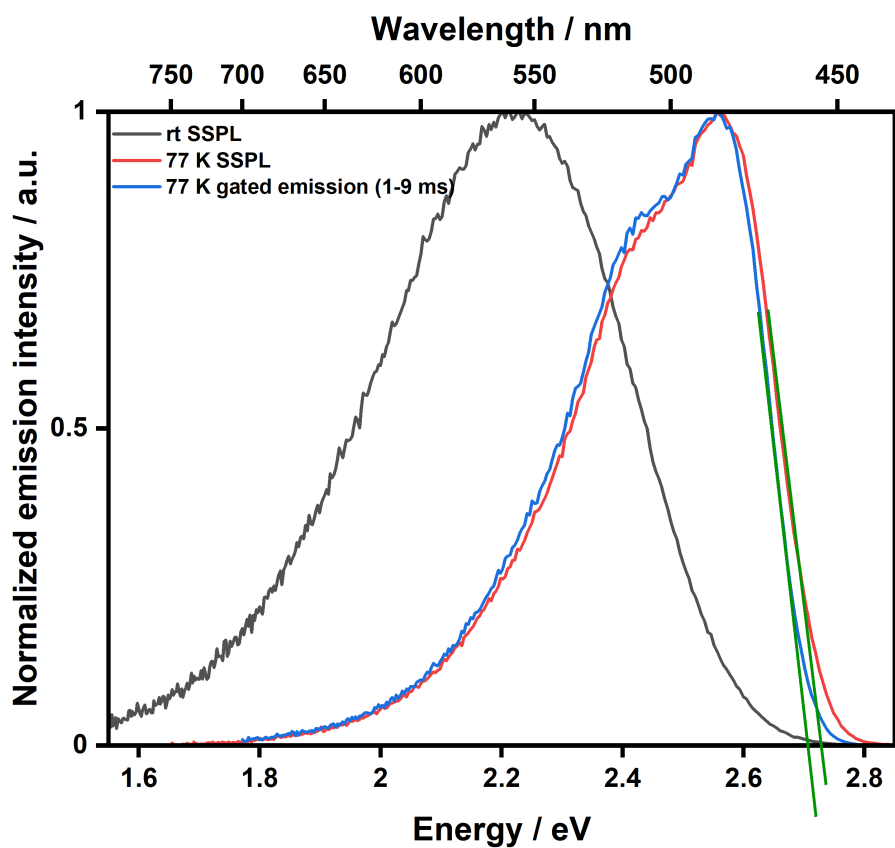

Figure S46. Steady-state emission spectra obtained for 4CzIPN in BuCN at room temperature and 77 K, and gated emission spectrum at 77 K, employing a 1 - 9 ms time window. In all cases  $\lambda_{\text{exc}} = 420$  nm.

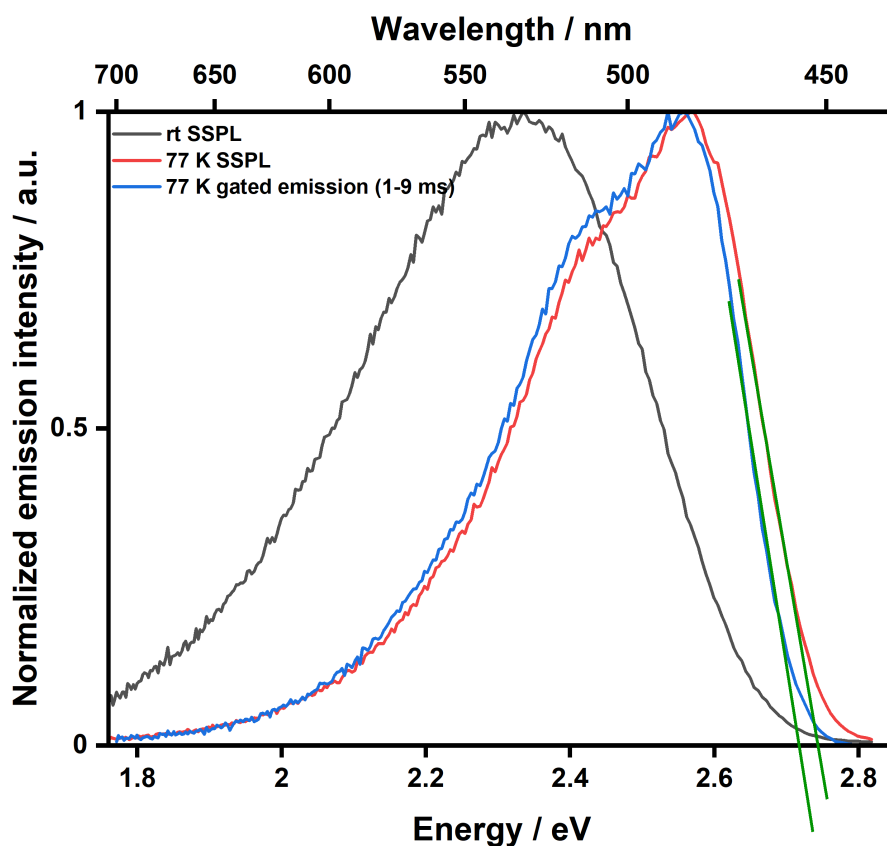

**Figure S47.** Steady-state emission spectra obtained for **4CzIPN** in 2-MeTHF at room temperature and 77 K, and gated emission spectrum at 77 K, employing a 1 - 9 ms time window. In all cases  $\lambda_{\text{exc}} = 420$  nm.

**Table S17.** Energy values for the  $S_1$  and  $T_1$  states of **[Cu(dmp)(xantphos)]PF<sub>6</sub>** and **4CzIPN**.<sup>a</sup>

|                                          | 2-MeTHF           |                   |                                    | BuCN              |                   |                                    | Average $\Delta E_{\text{ST}} / \text{eV}$ |
|------------------------------------------|-------------------|-------------------|------------------------------------|-------------------|-------------------|------------------------------------|--------------------------------------------|
|                                          | $S_1 / \text{eV}$ | $T_1 / \text{eV}$ | $\Delta E_{\text{ST}} / \text{eV}$ | $S_1 / \text{eV}$ | $T_1 / \text{eV}$ | $\Delta E_{\text{ST}} / \text{eV}$ |                                            |
| <b>[Cu(dmp)(xantphos)]PF<sub>6</sub></b> | 2.79              | 2.62              | 0.17                               | 2.75              | 2.61              | 0.14                               | 0.16                                       |
| <b>4CzIPN</b>                            | 2.75              | 2.72              | 0.03                               | 2.74              | 2.71              | 0.03                               | 0.03                                       |

<sup>a</sup>  $S_1$  energies estimated from the high-energy tangential onset from the 77 K steady-state emission spectra.  $T_1$  energies estimated from the tangent from the 77 K gated emission spectra (employing 1 - 9 ms time window).  $\Delta E_{\text{ST}} = T_1 - S_1$ .

## Time resolved emission spectra

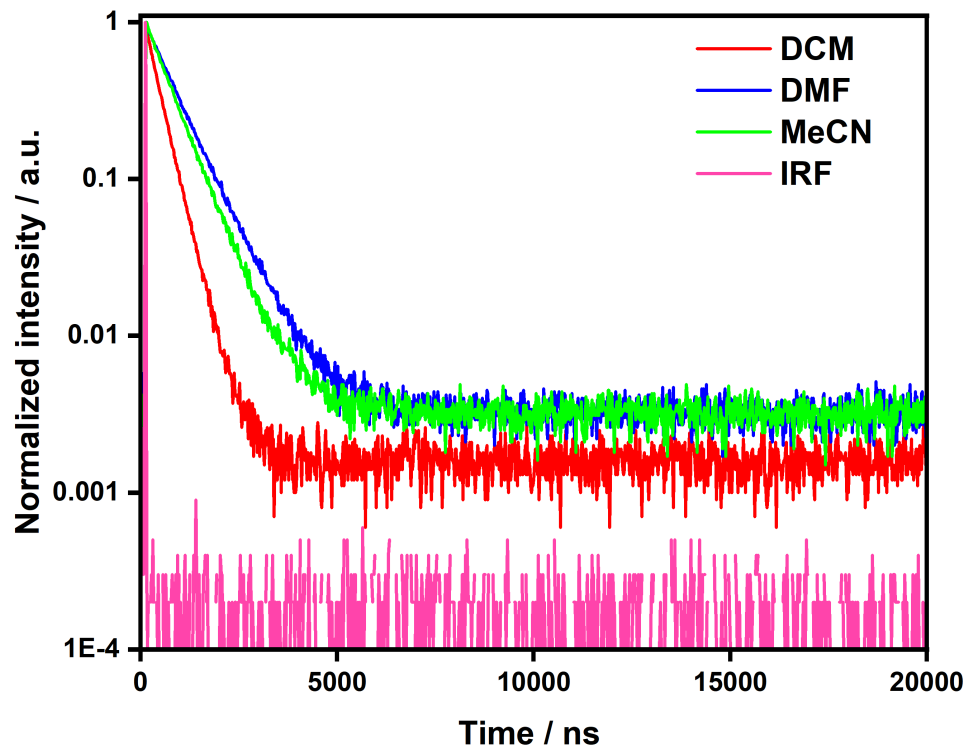

Figure S48. Time-resolved PL decays of [Ru(bpy)<sub>3</sub>](PF<sub>6</sub>)<sub>2</sub> recorded in various solvents under N<sub>2</sub> in 10<sup>-5</sup> M solutions with  $\lambda_{\text{exc}} = 378$  nm. No data obtained in THF due poor solubility.

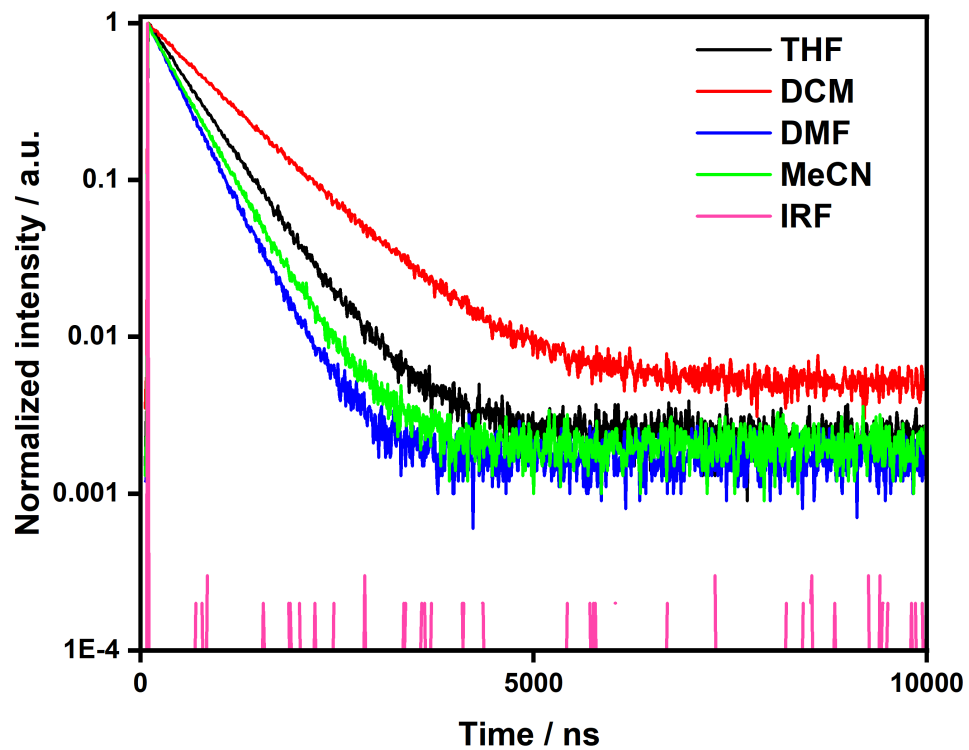

Figure S49. Time-resolved PL decays of [Ir(ppy)<sub>2</sub>(dtbbpy)]PF<sub>6</sub> recorded in various solvents under N<sub>2</sub> in 10<sup>-5</sup> M solutions with  $\lambda_{\text{exc}} = 378$  nm.

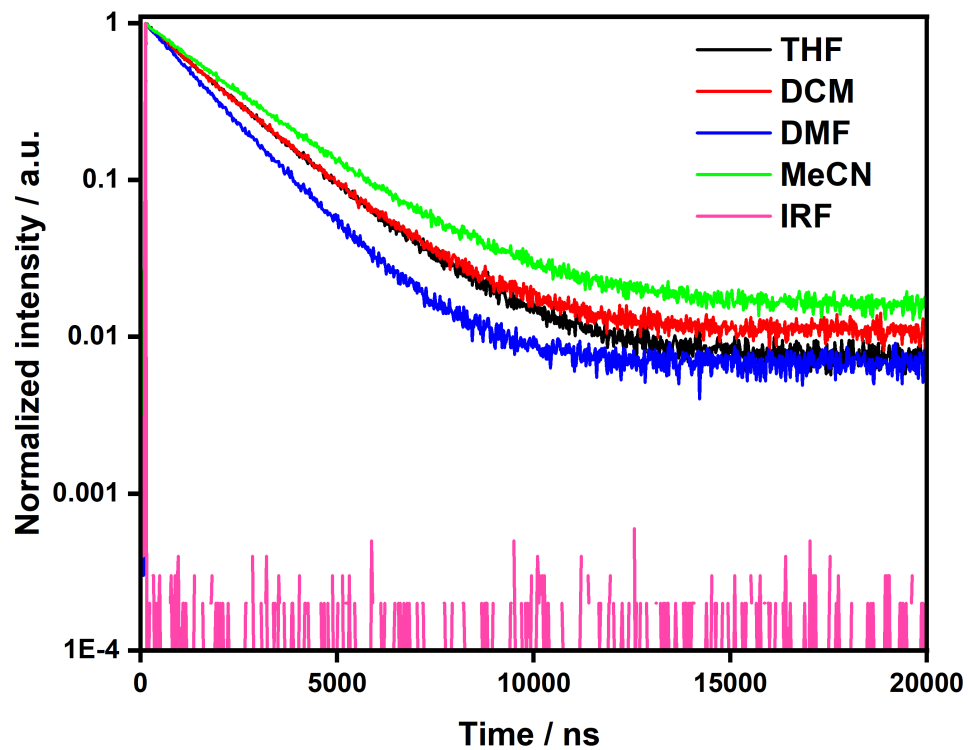

Figure S50. Time-resolved PL decays of  $[\text{Ir}(\text{dF}(\text{CF}_3)\text{ppy})_2(\text{dtbbpy})]\text{PF}_6$  recorded in various solvents under  $\text{N}_2$  in  $10^{-5}$  M solutions with  $\lambda_{\text{exc}} = 378$  nm.

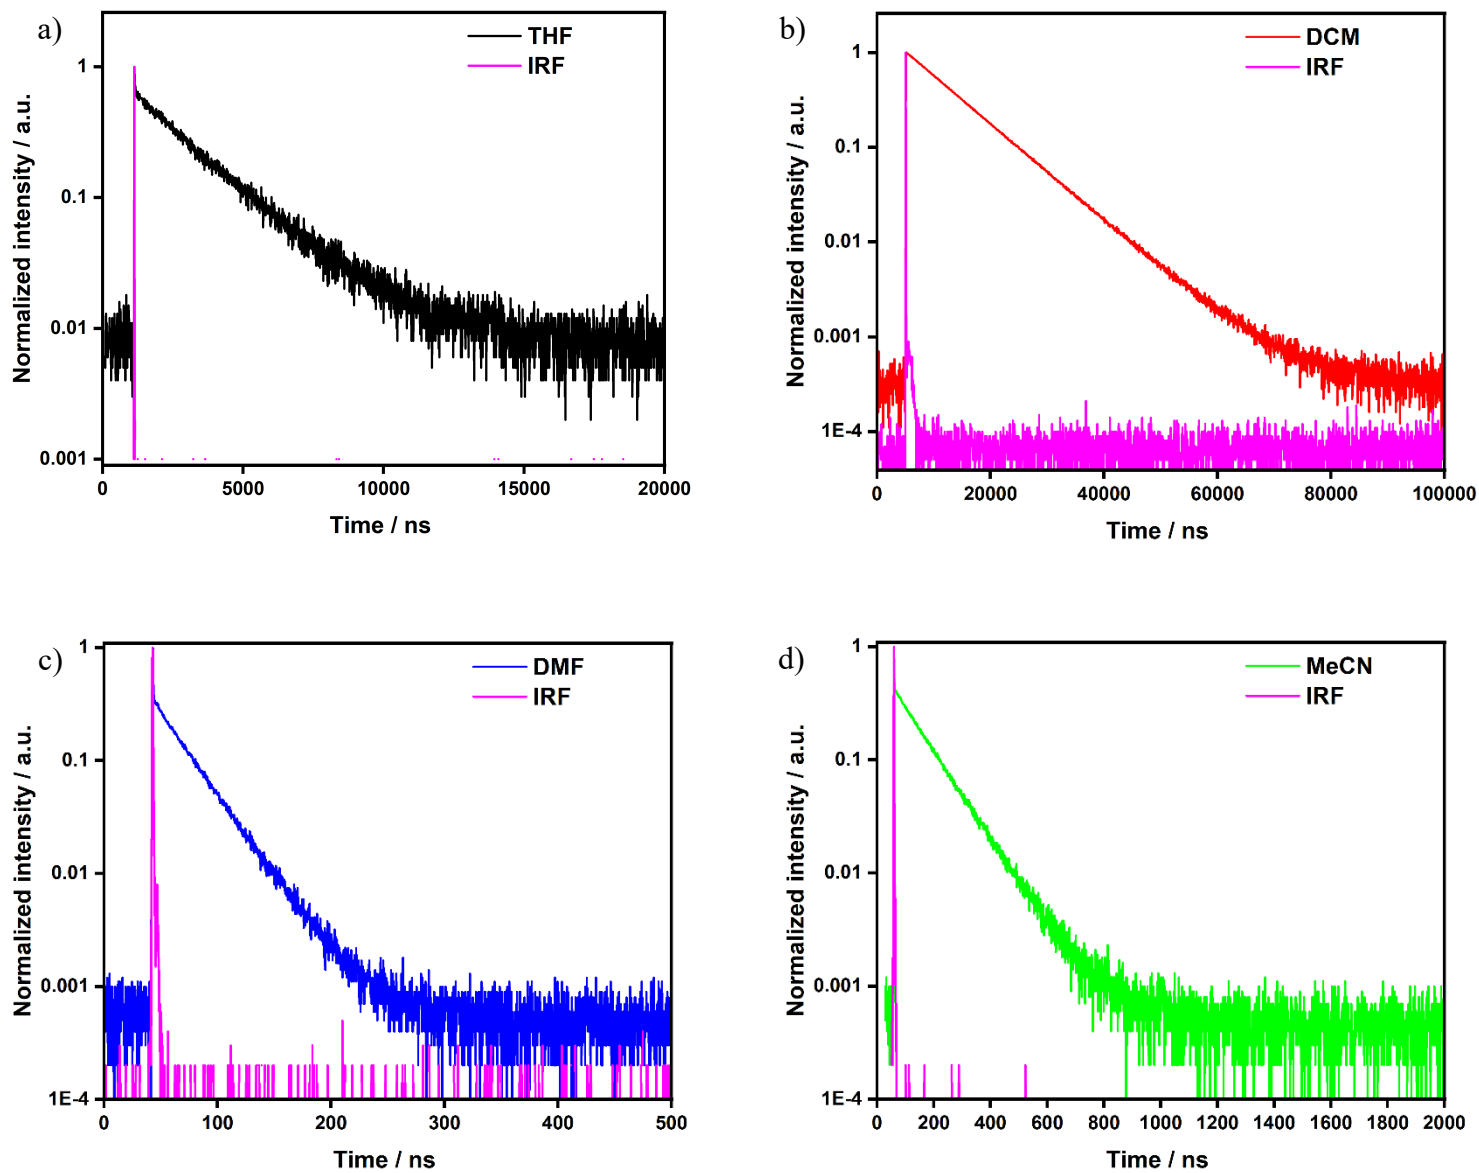

Figure S51. Time-resolved PL decays of  $[\text{Cu}(\text{dmp})(\text{xantphos})]\text{PF}_6$  recorded in a) THF, b) DCM, c) DMF and d) MeCN under  $\text{N}_2$  in  $10^{-5}$  M solutions with  $\lambda_{\text{exc}} = 378$  nm. Due to different time windows being required for different solvents, multiple IRFs are given.

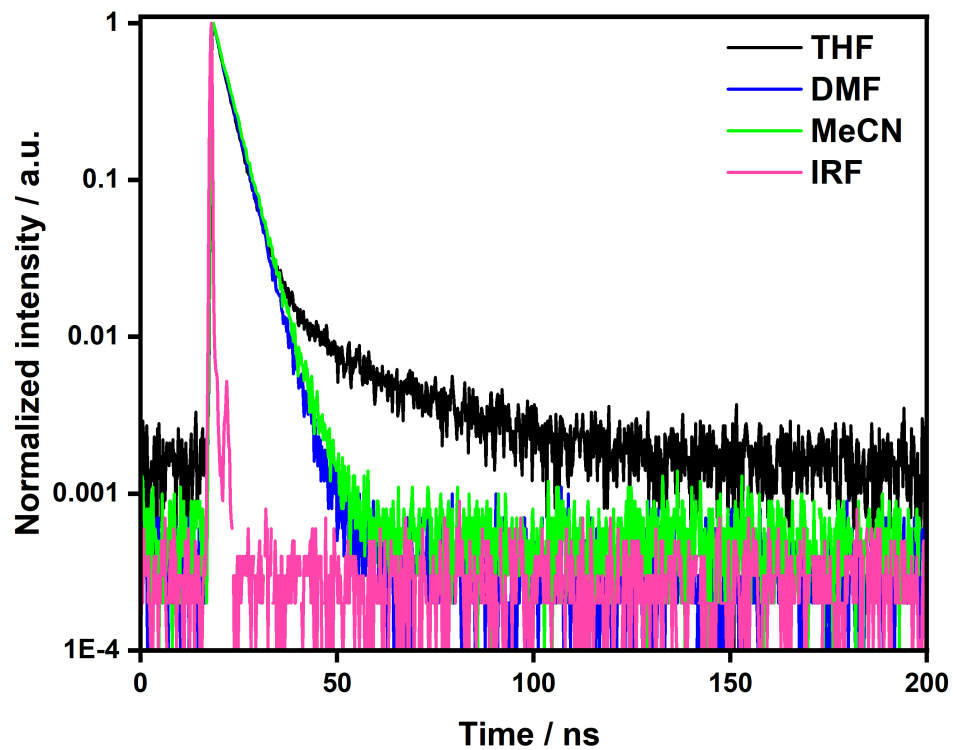

Figure S52. Time-resolved PL decays of **Eosin Y** recorded in various solvents under N<sub>2</sub> in 10<sup>-5</sup> M solutions with  $\lambda_{\text{exc}} = 378$  nm.



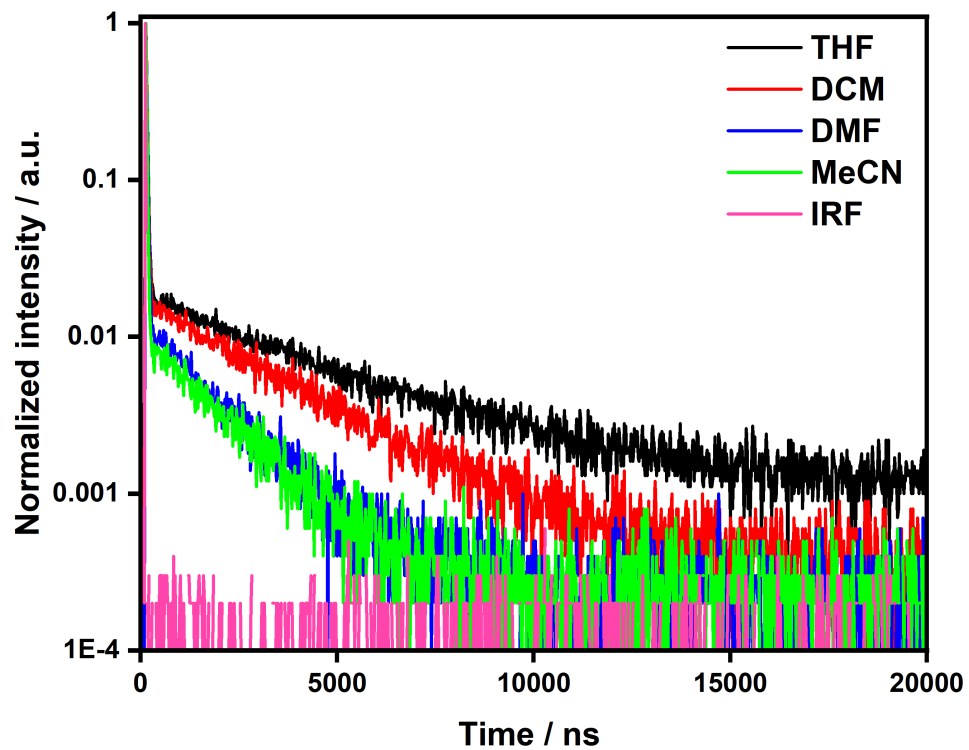

Figure S53. Time-resolved PL decays of **4CzIPN** recorded in various solvents under  $N_2$  in  $10^{-5}$  M solutions with  $\lambda_{exc} = 378$  nm.

Table S18. Excited-state lifetimes of the PCs in the different solvents.<sup>a</sup>

|                                                                      | $\tau_{\text{PL}} / \text{ns}$                       |                                                      |                                                    |                                                                                              |
|----------------------------------------------------------------------|------------------------------------------------------|------------------------------------------------------|----------------------------------------------------|----------------------------------------------------------------------------------------------|
|                                                                      | THF                                                  | DCM                                                  | DMF                                                | MeCN                                                                                         |
| <b>[Ru(bpy)<sub>3</sub>](PF<sub>6</sub>)<sub>2</sub></b>             |                                                      | 390                                                  | 784                                                | 665 (825) <sup>b</sup>                                                                       |
| <b>[Ir(ppy)<sub>2</sub>(dtbbpy)]PF<sub>6</sub></b>                   | 582                                                  | 896                                                  | 430                                                | 488 (386) <sup>c</sup>                                                                       |
| <b>[Ir(dF(CF<sub>3</sub>)ppy)<sub>2</sub>(dtbbpy)]PF<sub>6</sub></b> | 2014                                                 | 2007                                                 | 1597                                               | 2311 (2300) <sup>d</sup>                                                                     |
| <b>[Cu(dmp)(xantphos)]PF<sub>6</sub></b>                             | 2234                                                 | 8513<br>(1133) <sup>g</sup>                          | 29.5                                               | 111                                                                                          |
| <b>Eosin Y</b>                                                       | $\tau_{\text{p}}$ : 3.64<br>$\tau_{\text{d}}$ : 23.4 |                                                      | $\tau_{\text{p}}$ : 4.06<br>$\tau_{\text{d}}$ : 25 | $\tau_{\text{p}}$ : 4.27 (2.10) <sup>e</sup><br>$\tau_{\text{d}}$ : 10                       |
| <b>4CzIPN</b>                                                        | $\tau_{\text{p}}$ : 30<br>$\tau_{\text{d}}$ : 4010   | $\tau_{\text{p}}$ : 24.3<br>$\tau_{\text{d}}$ : 2910 | $\tau_{\text{p}}$ : 22<br>$\tau_{\text{d}}$ : 1640 | $\tau_{\text{p}}$ : 13.5 (18.7) <sup>f</sup><br>$\tau_{\text{d}}$ : 1650 (1390) <sup>f</sup> |

<sup>a</sup> Lifetimes determined under N<sub>2</sub> at room temperature using  $\lambda_{\text{exc}} = 378$  nm.  $\tau_{\text{p}}$  and  $\tau_{\text{d}}$  refer to the prompt and delayed lifetimes, respectively. When no value is reported, this is due to poor solubility of the PC in that solvent. Values in parentheses indicate literature values and are referenced accordingly. <sup>b</sup> Value taken from Ref<sup>44</sup> using  $\lambda_{\text{exc}} = 450$  or 500 nm laser. It is not clearly identified which excitation wavelength was used. <sup>c</sup> Value taken from Ref<sup>46</sup> using  $\lambda_{\text{exc}} = 341$  nm. <sup>d</sup> Value taken from Ref<sup>39</sup> using  $\lambda_{\text{exc}} = 337$  nm. <sup>e</sup> Value taken from Ref<sup>48</sup> using  $\lambda_{\text{exc}} = 475$  nm and was obtained in MeOH. <sup>f</sup> Value taken from Ref<sup>49</sup> using  $\lambda_{\text{exc}} = 365$  nm. <sup>g</sup> Value taken from Ref<sup>50</sup> using **[Cu(dmp)(xantphos)]BF<sub>4</sub>** and using  $\lambda_{\text{exc}} = 375$  nm.

## Stern-Volmer quenching studies

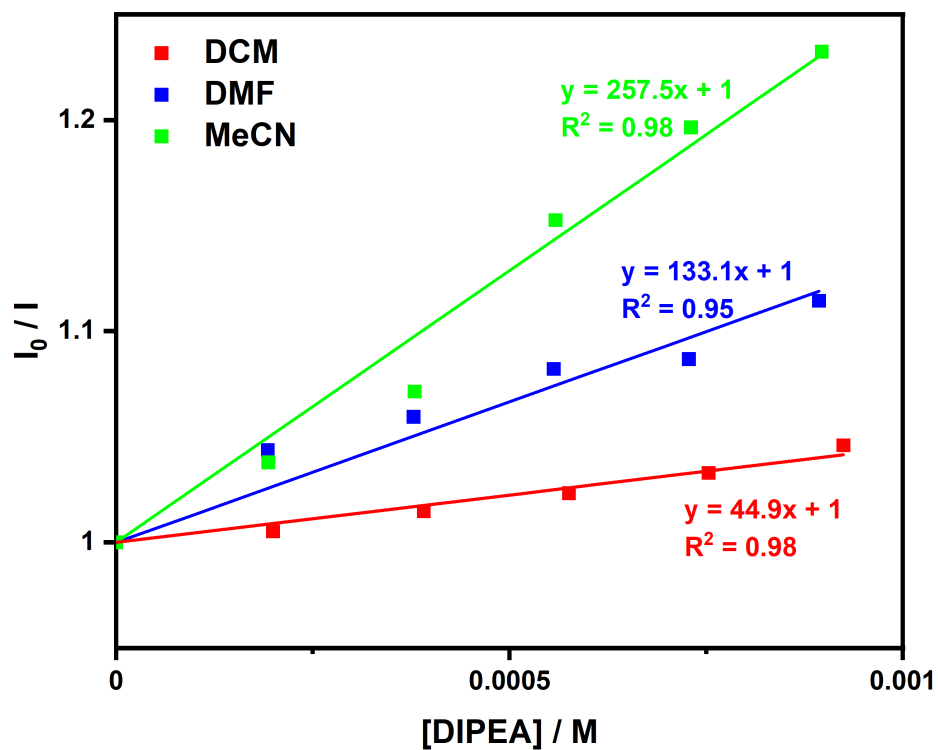

Figure S54. Stern Volmer quenching plot for  $[Ru(bpy)_3](PF_6)_2$  in various solvents with DIPEA. No values obtained in THF due to poor solubility.

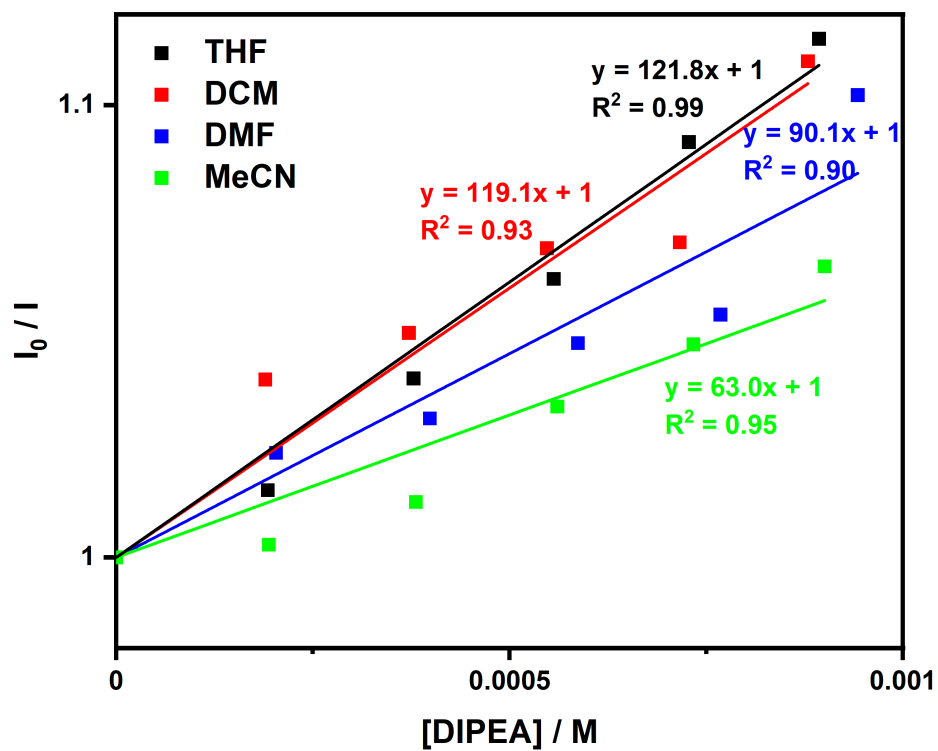

Figure S55. Stern Volmer quenching plot for  $[Ir(ppy)_2(dtbbpy)]PF_6$  in various solvents with DIPEA.

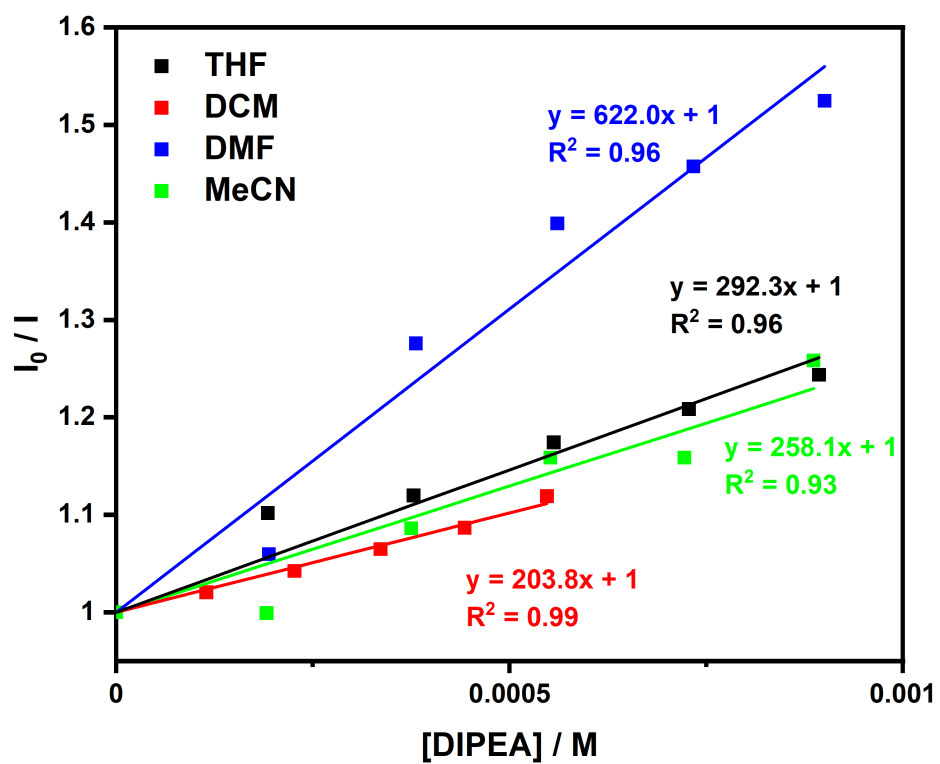

Figure S56. Stern Volmer quenching plot for  $[Ir(dF(CF_3)ppy)_2(dtbbpy)]PF_6$  in various solvents with DIPEA.

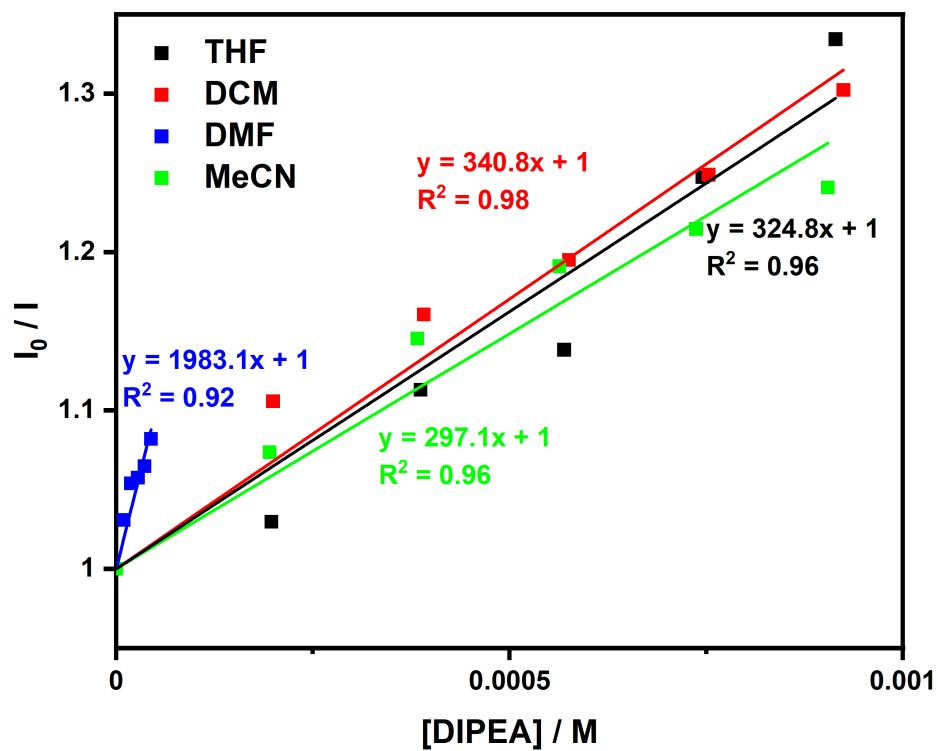

Figure S57. Stern Volmer quenching plot for  $[Cu(dmp)(xantphos)]PF_6$  in various solvents with DIPEA.

A lower concentration of DIPEA had to be used with  $[Cu(dmp)(xantphos)]PF_6$  in DMF to avoid observing a saturation of the quenching.

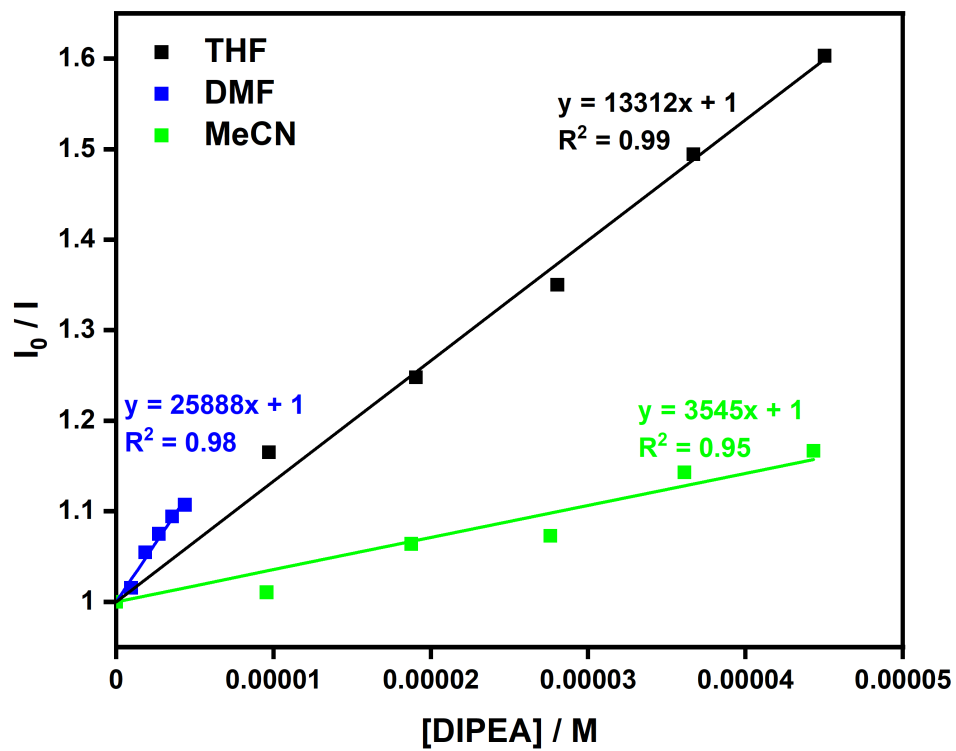

Figure S58. Stern Volmer quenching plot for **Eosin Y** in various solvents with DIPEA. No values obtained in DCM due to poor solubility.

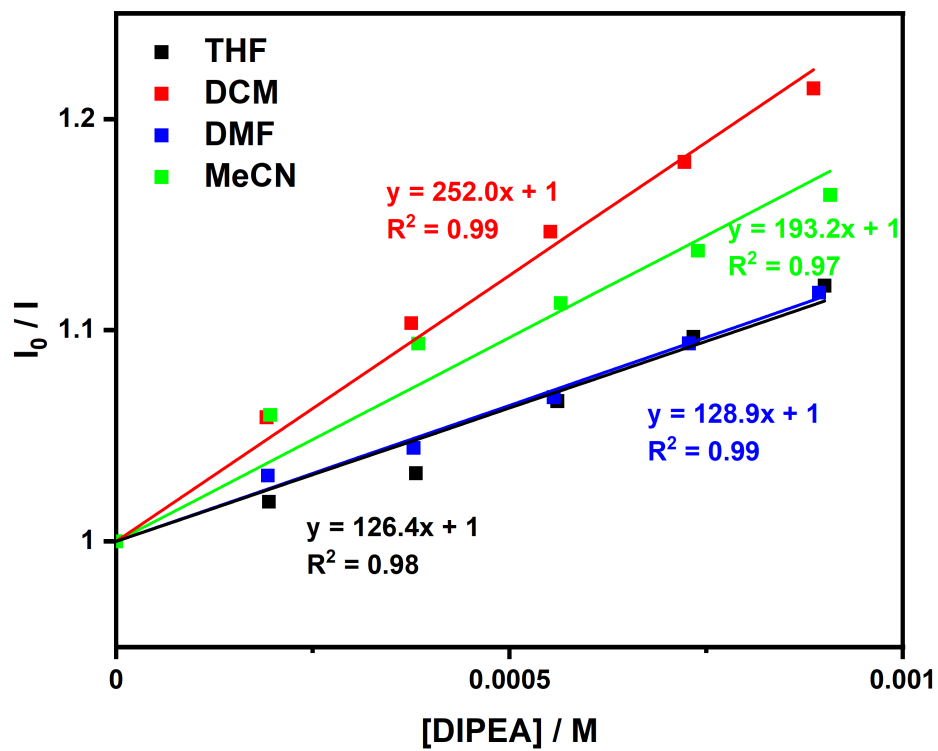

Figure S59. Stern Volmer quenching plot for 4CzIPN in various solvents with DIPEA.



Table S19. Stern Volmer quenching constants for the PCs in various solvents using DIPEA as the quencher.<sup>a</sup>

|                                                                      | $K_{sv}$ |       |        |       |
|----------------------------------------------------------------------|----------|-------|--------|-------|
|                                                                      | THF      | DCM   | DMF    | MeCN  |
| <b>[Ru(bpy)<sub>3</sub>](PF<sub>6</sub>)<sub>2</sub></b>             |          | 44.9  | 133.1  | 257.5 |
| <b>[Ir(ppy)<sub>2</sub>(dtbbpy)]PF<sub>6</sub></b>                   | 121.8    | 119.1 | 90.1   | 63.0  |
| <b>[Ir(dF(CF<sub>3</sub>)ppy)<sub>2</sub>(dtbbpy)]PF<sub>6</sub></b> | 292.3    | 203.8 | 622.0  | 258.1 |
| <b>[Cu(dmp)(xantphos)]PF<sub>6</sub></b>                             | 324.8    | 340.8 | 1983.1 | 297.1 |
| <b>Eosin Y</b>                                                       | 13312    |       | 25888  | 3545  |
| <b>4CzIPN</b>                                                        | 126.4    | 252.0 | 128.9  | 193.2 |

<sup>a</sup> Stern-Volmer quenching studies conducted under N<sub>2</sub>. When no value is reported, this is due to poor solubility of the PC in that solvent.

Table S20. Quenching rates constants for the PCs in various solvents using DIPEA as the quencher.<sup>a</sup>

|                                                                      | $k_q / 10^7 \text{ M}^{-1} \text{ s}^{-1}$ |                   |                                 |                                  |
|----------------------------------------------------------------------|--------------------------------------------|-------------------|---------------------------------|----------------------------------|
|                                                                      | THF                                        | DCM               | DMF                             | MeCN                             |
| <b>[Ru(bpy)<sub>3</sub>](PF<sub>6</sub>)<sub>2</sub></b>             |                                            | 11.5              | 17.0                            | 38.7                             |
| <b>[Ir(ppy)<sub>2</sub>(dtbbpy)]PF<sub>6</sub></b>                   | 20.9                                       | 13.3              | 21.0                            | 12.9                             |
| <b>[Ir(dF(CF<sub>3</sub>)ppy)<sub>2</sub>(dtbbpy)]PF<sub>6</sub></b> | 14.5                                       | 10.2              | 38.9                            | 11.2                             |
| <b>[Cu(dmp)(xantphos)]PF<sub>6</sub></b>                             | 14.5                                       | 4.00              | 6720                            | 268                              |
| <b>Eosin Y</b>                                                       | $3.66 \times 10^5$ <sup>b</sup>            |                   | $6.38 \times 10^5$ <sup>b</sup> | $0.83 \times 10^5$ <sup>b</sup>  |
|                                                                      | $0.569 \times 10^5$ <sup>c</sup>           |                   | $1.04 \times 10^5$ <sup>c</sup> | $0.355 \times 10^5$ <sup>c</sup> |
| <b>4CzIPN</b>                                                        | 421 <sup>b</sup>                           | 1040 <sup>b</sup> | 586 <sup>b</sup>                | 1430 <sup>b</sup>                |
|                                                                      | 3.15 <sup>c</sup>                          | 8.66 <sup>c</sup> | 7.86 <sup>c</sup>               | 11.7 <sup>c</sup>                |

<sup>a</sup> Stern-Volmer quenching studies conducted under N<sub>2</sub>. When no value is reported, this is due to poor solubility of the PC in that solvent. <sup>b</sup> Determined using  $\tau_p$  values given in Table S18. <sup>c</sup> Determined using  $\tau_d$  values given in Table S18.

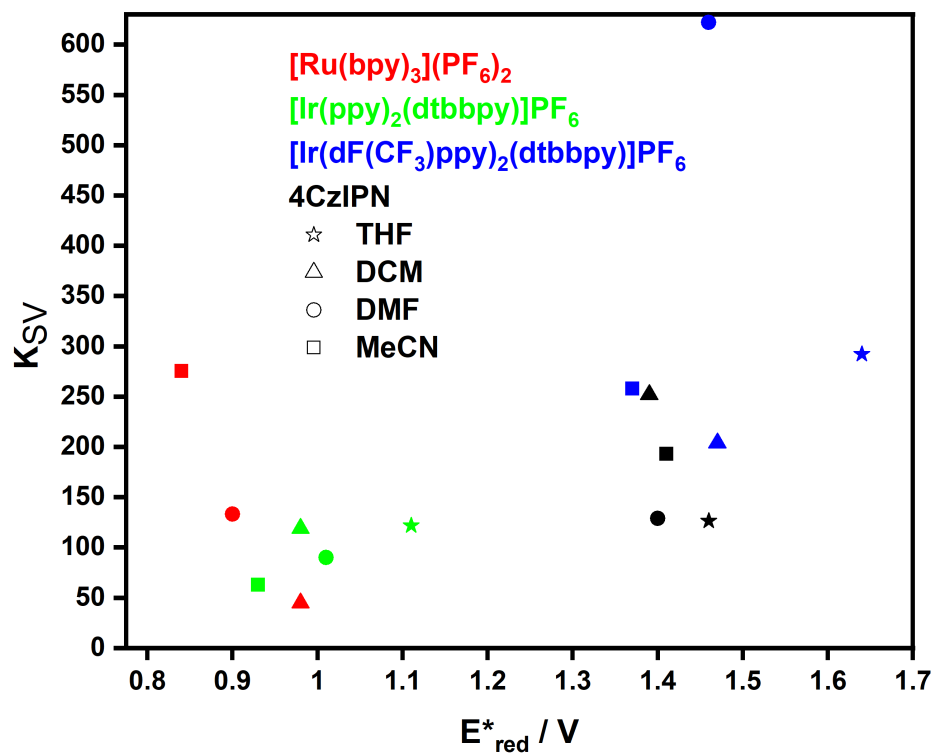

Figure S60. Comparison of the  $E^*_{red}$  values with the Stern-Volmer constants obtained using DIPEA for some of the PCs. Star = THF, triangle = DCM, circle = DMF and square = MeCN.

### **Photostability studies**

For the photostability studies, the reaction mixture was prepared according to the experimental procedure. Once prepared, a 20  $\mu\text{L}$  (pinacol coupling, ATRA reaction, 2+2 cycloaddition), 15  $\mu\text{L}$  (*E/Z* isomerisation) or 80  $\mu\text{L}$  (Giese type addition) aliquot was removed from the reaction and diluted in 1 mL of the relevant solvent and a UV-vis absorption spectrum was obtained. The reaction mixture was irradiated in the photoreactor using the 456 nm or 390 nm Kessil lamp for 24 h, as dictated in the experimental procedure. Upon completion, a 20  $\mu\text{L}$  (pinacol coupling, ATRA reaction, 2+2 cycloaddition), 15  $\mu\text{L}$  (*E/Z* isomerisation) or 80  $\mu\text{L}$  (Giese type addition) aliquot was taken, diluted in 1 mL with the relevant solvent and a UV-vis absorption spectrum was recorded. In all cases, the UV-vis absorption spectra are normalized with respect to the highest energy band unless otherwise noted.

*Pinacol coupling:*

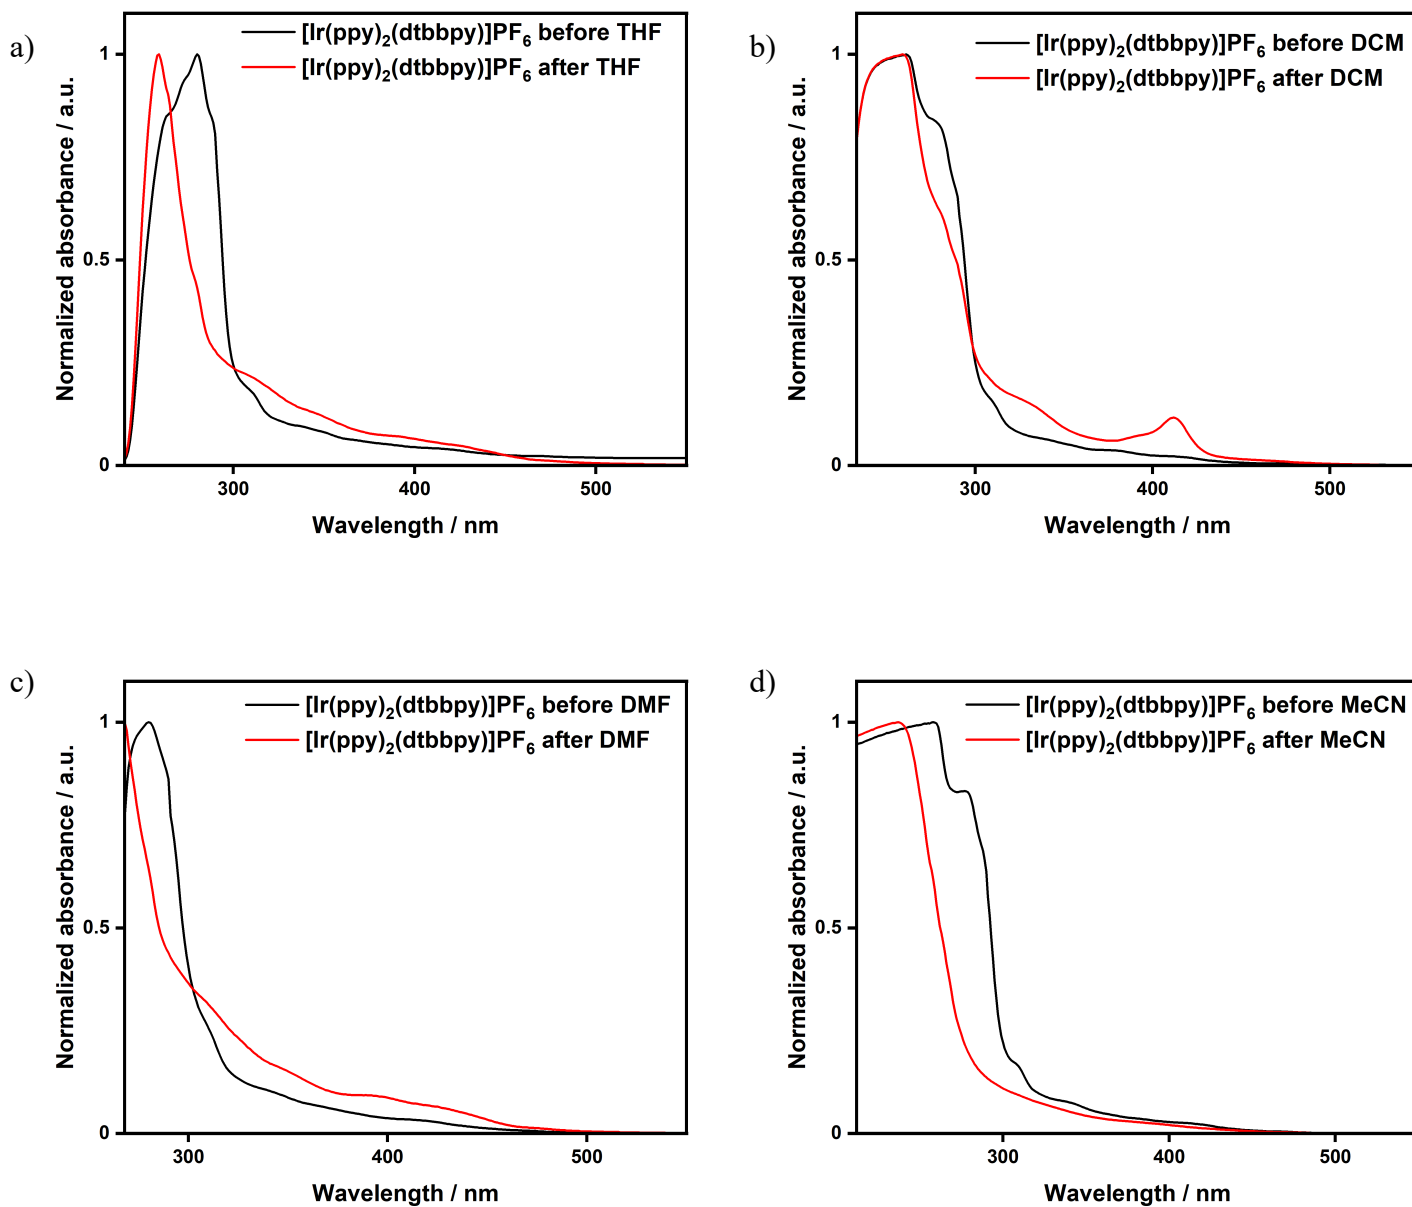

Figure S61 . UV-vis absorption spectra before and after irradiation for the pinacol coupling using  $[\text{I}(\text{ppy})_2(\text{dtbbpy})]\text{PF}_6$  as the PC in a) THF, b) DCM, c) DMF and d) MeCN.

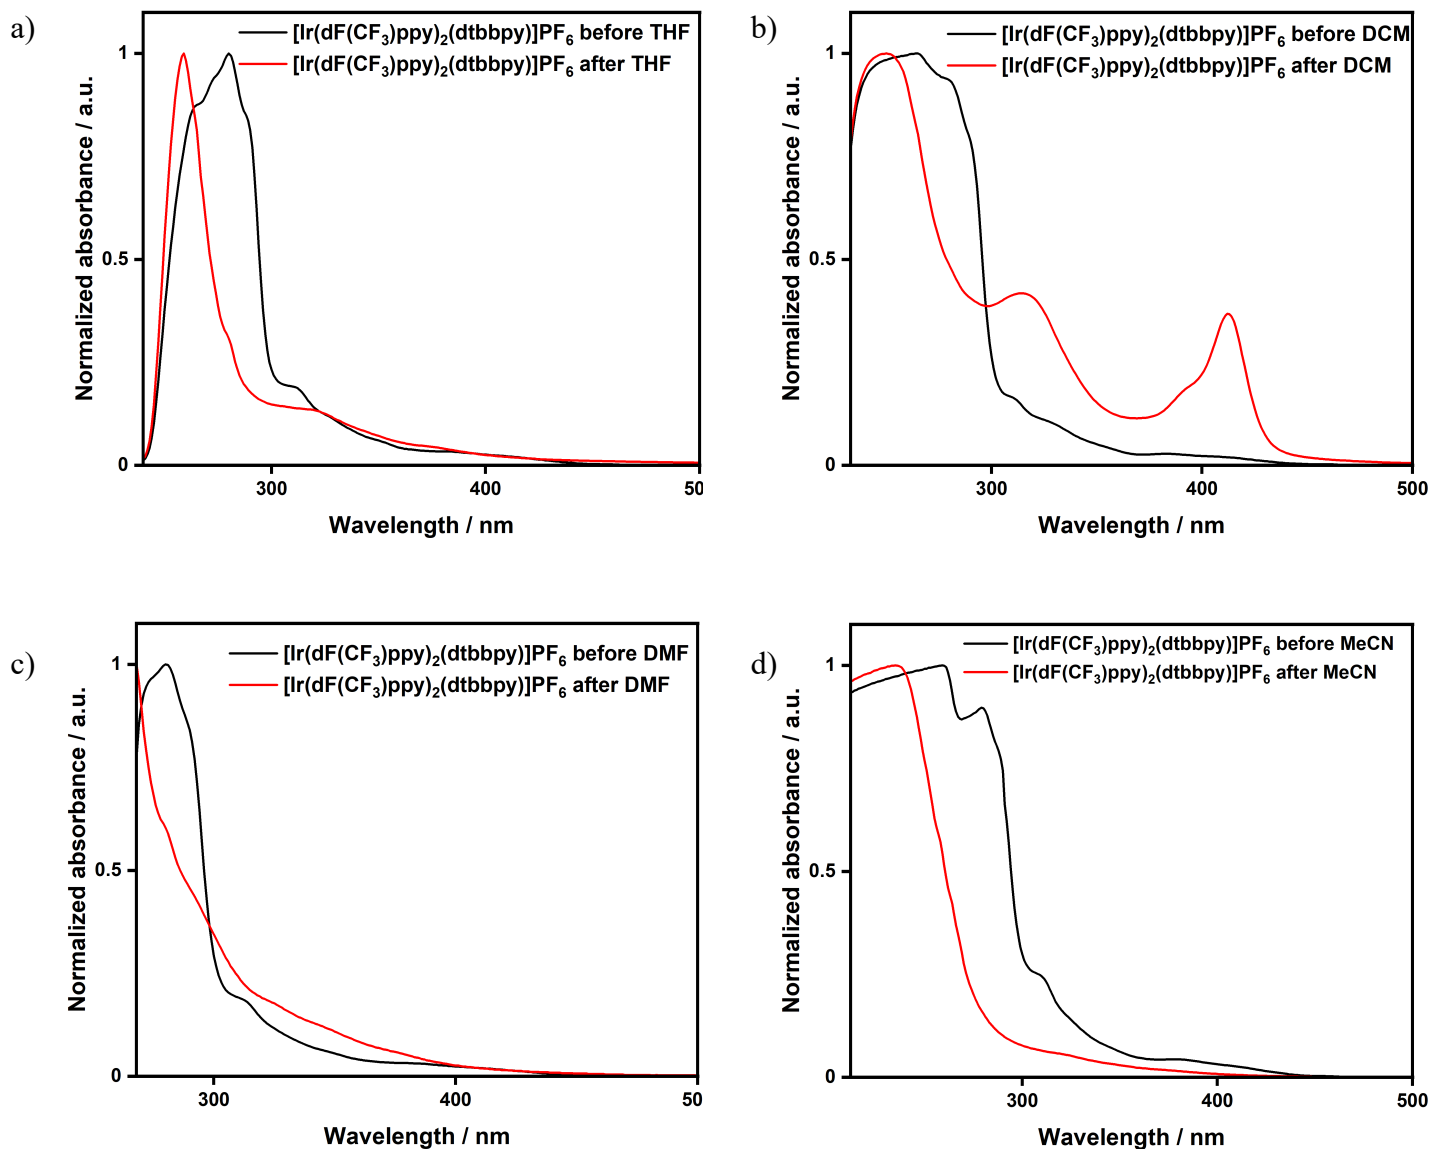

Figure S62. UV-vis absorption spectra before and after irradiation for the pinacol coupling using  $[\text{Ir}(\text{dF}(\text{CF}_3)\text{ppy})_2(\text{dtbbpy})]\text{PF}_6$  as the PC in a) THF, b) DCM, c) DMF and d) MeCN.

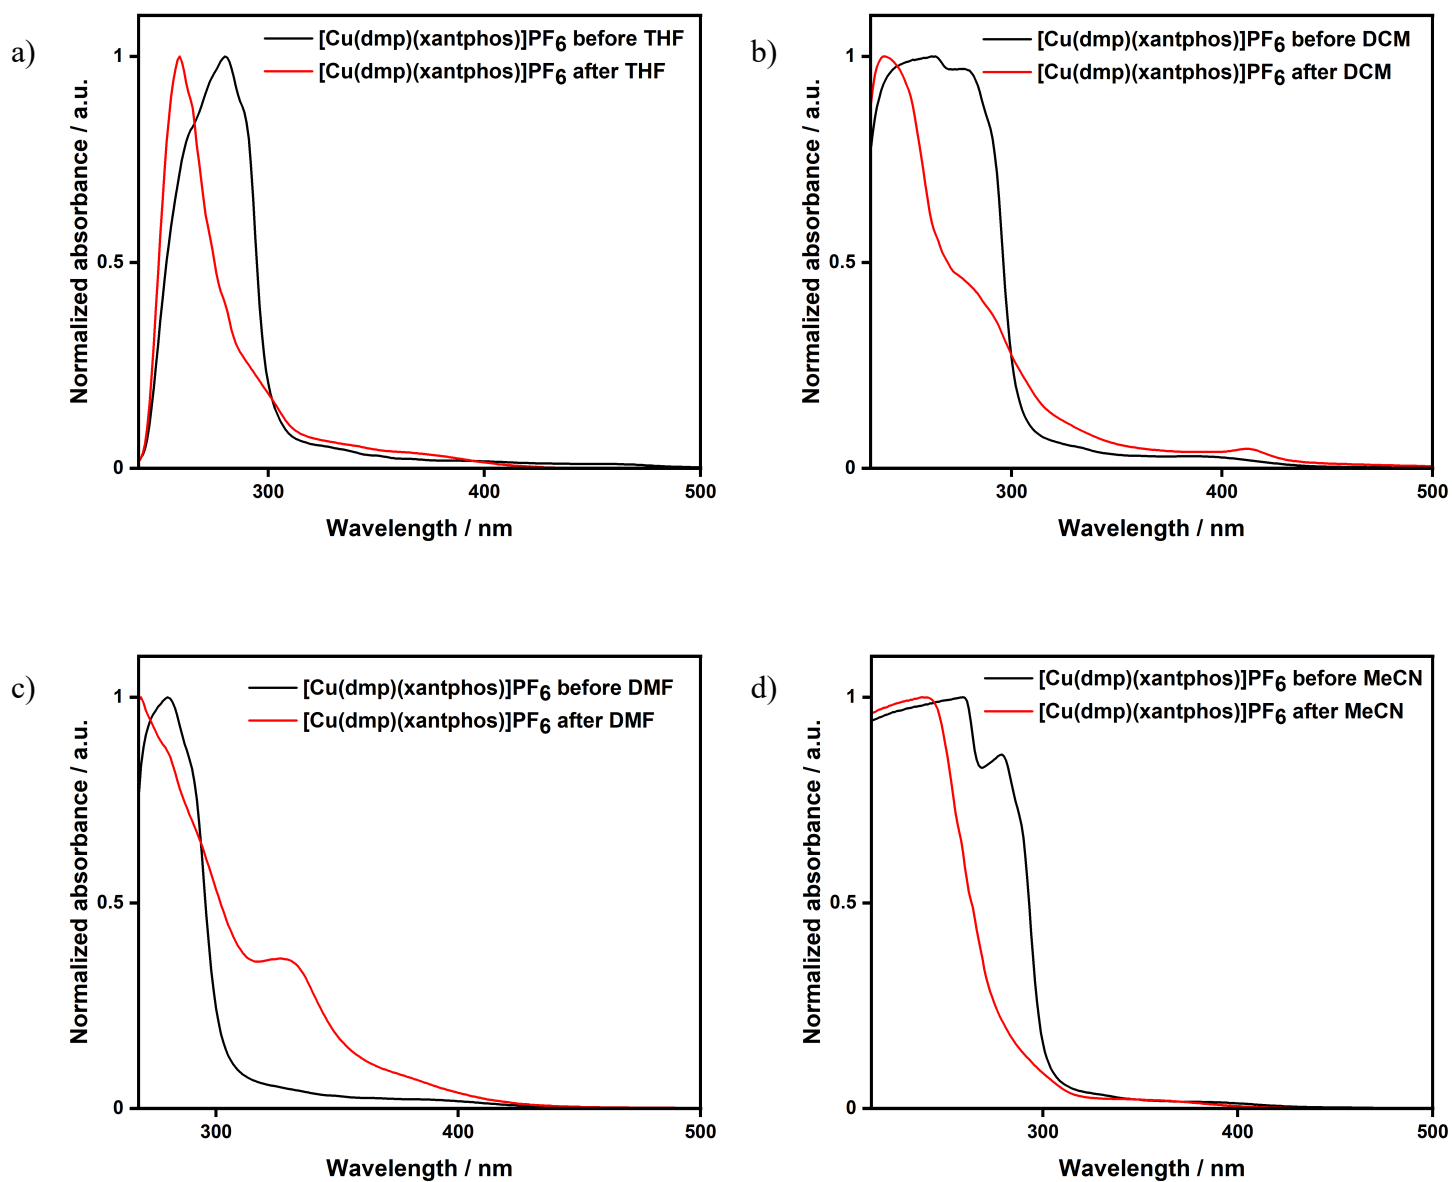

Figure S63. UV-vis absorption spectra before and after irradiation for the pinacol coupling using  $[\text{Cu}(\text{dmp})(\text{xantphos})]\text{PF}_6$  as the PC in a) THF, b) DCM, c) DMF and d) MeCN.

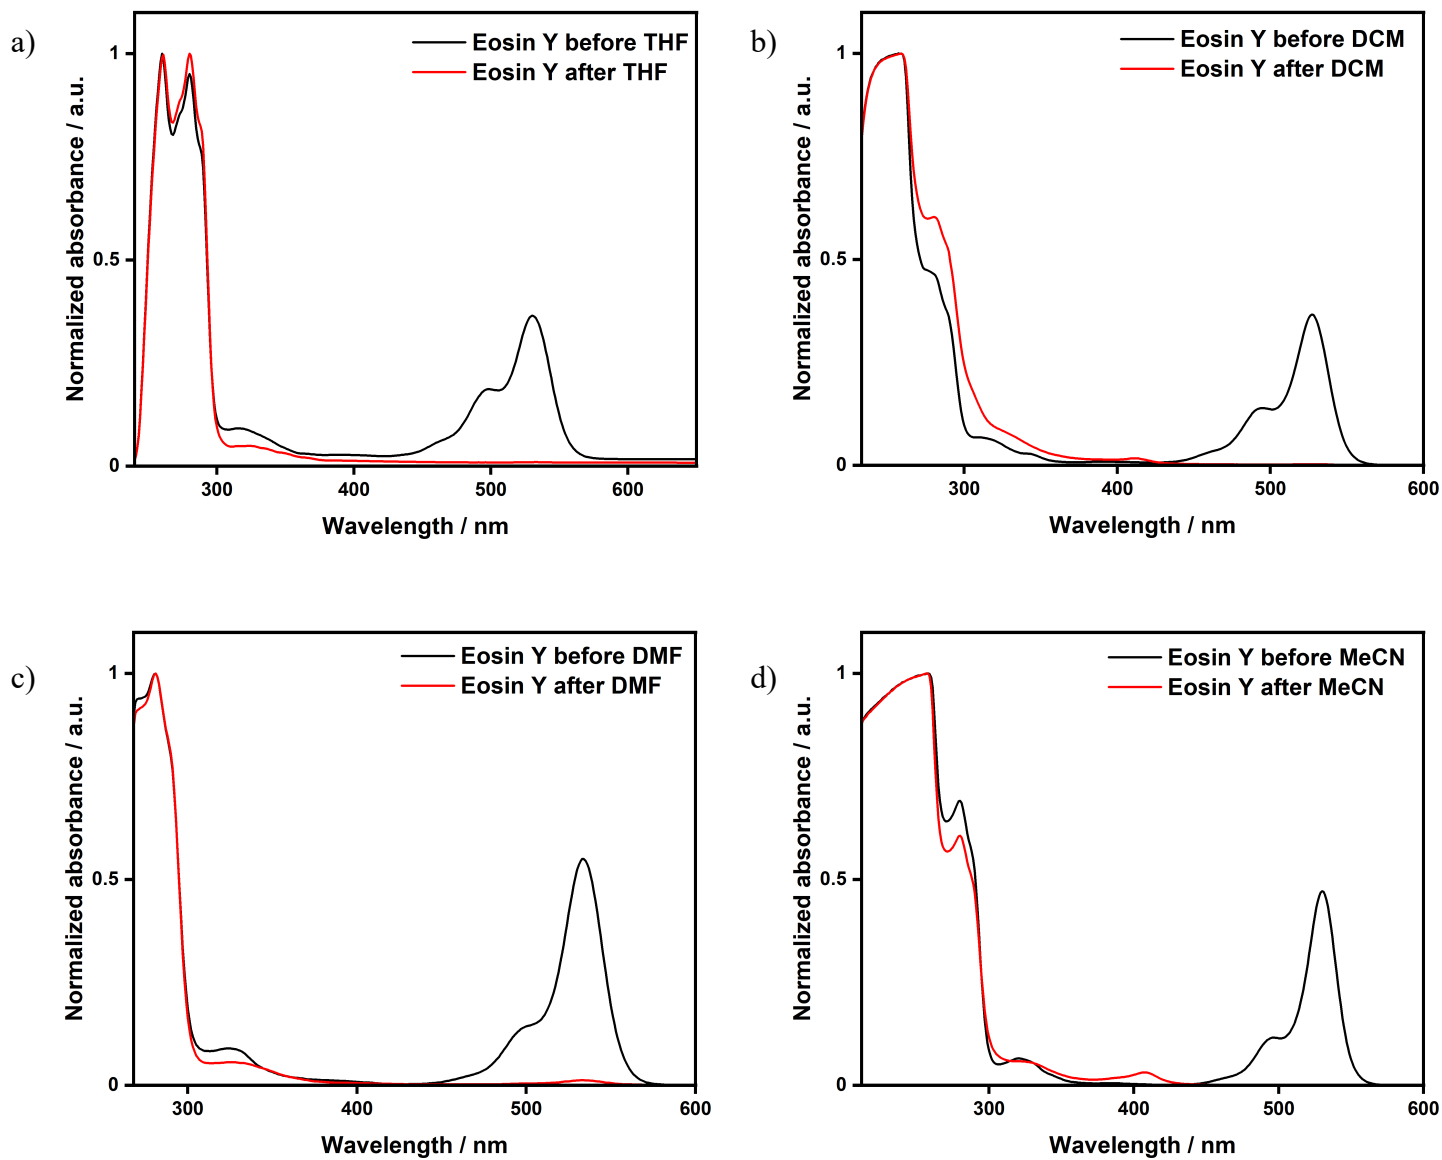

Figure S64. UV-vis absorption spectra before and after irradiation for the pinacol coupling using **Eosin Y** as the PC in a) THF, b) DCM, c) DMF and d) MeCN.

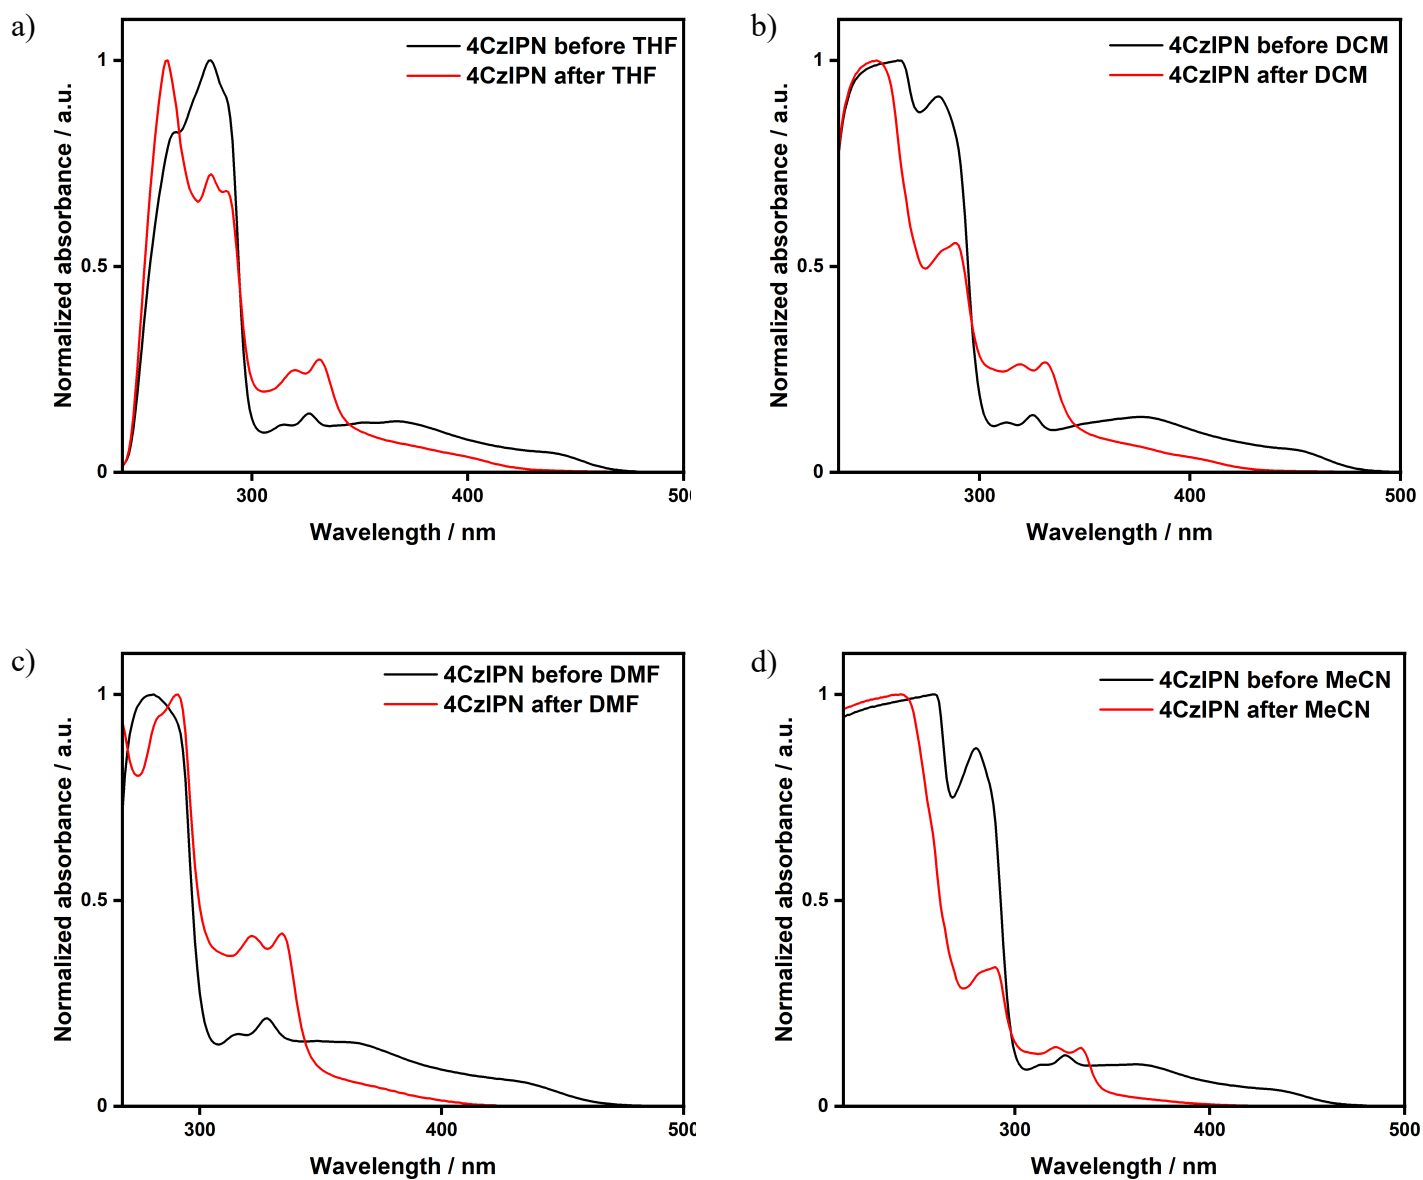

Figure S65. UV-vis absorption spectra before and after irradiation for the pinacol coupling using **4CzIPN** as the PC in a) THF, b) DCM, c) DMF and d) MeCN.



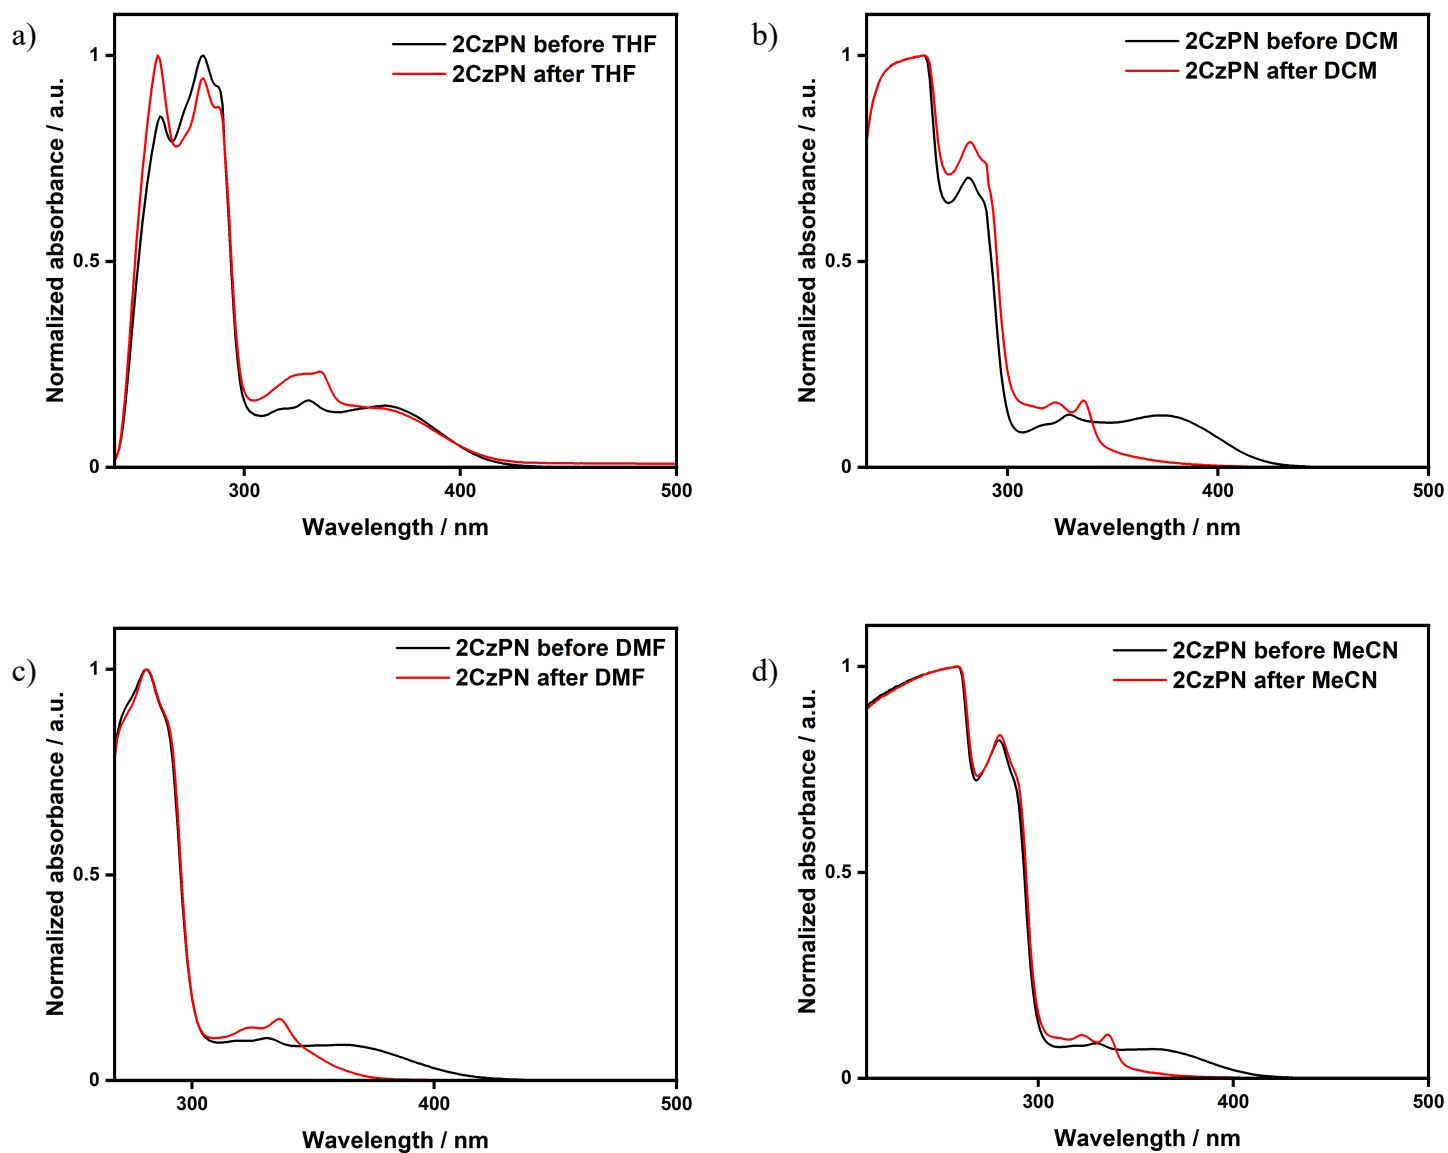

Figure S66. UV-vis absorption spectra before and after irradiation for the pinacol coupling using **2CzPN** as the PC in a) THF, b) DCM, c) DMF and d) MeCN.

ATRA:

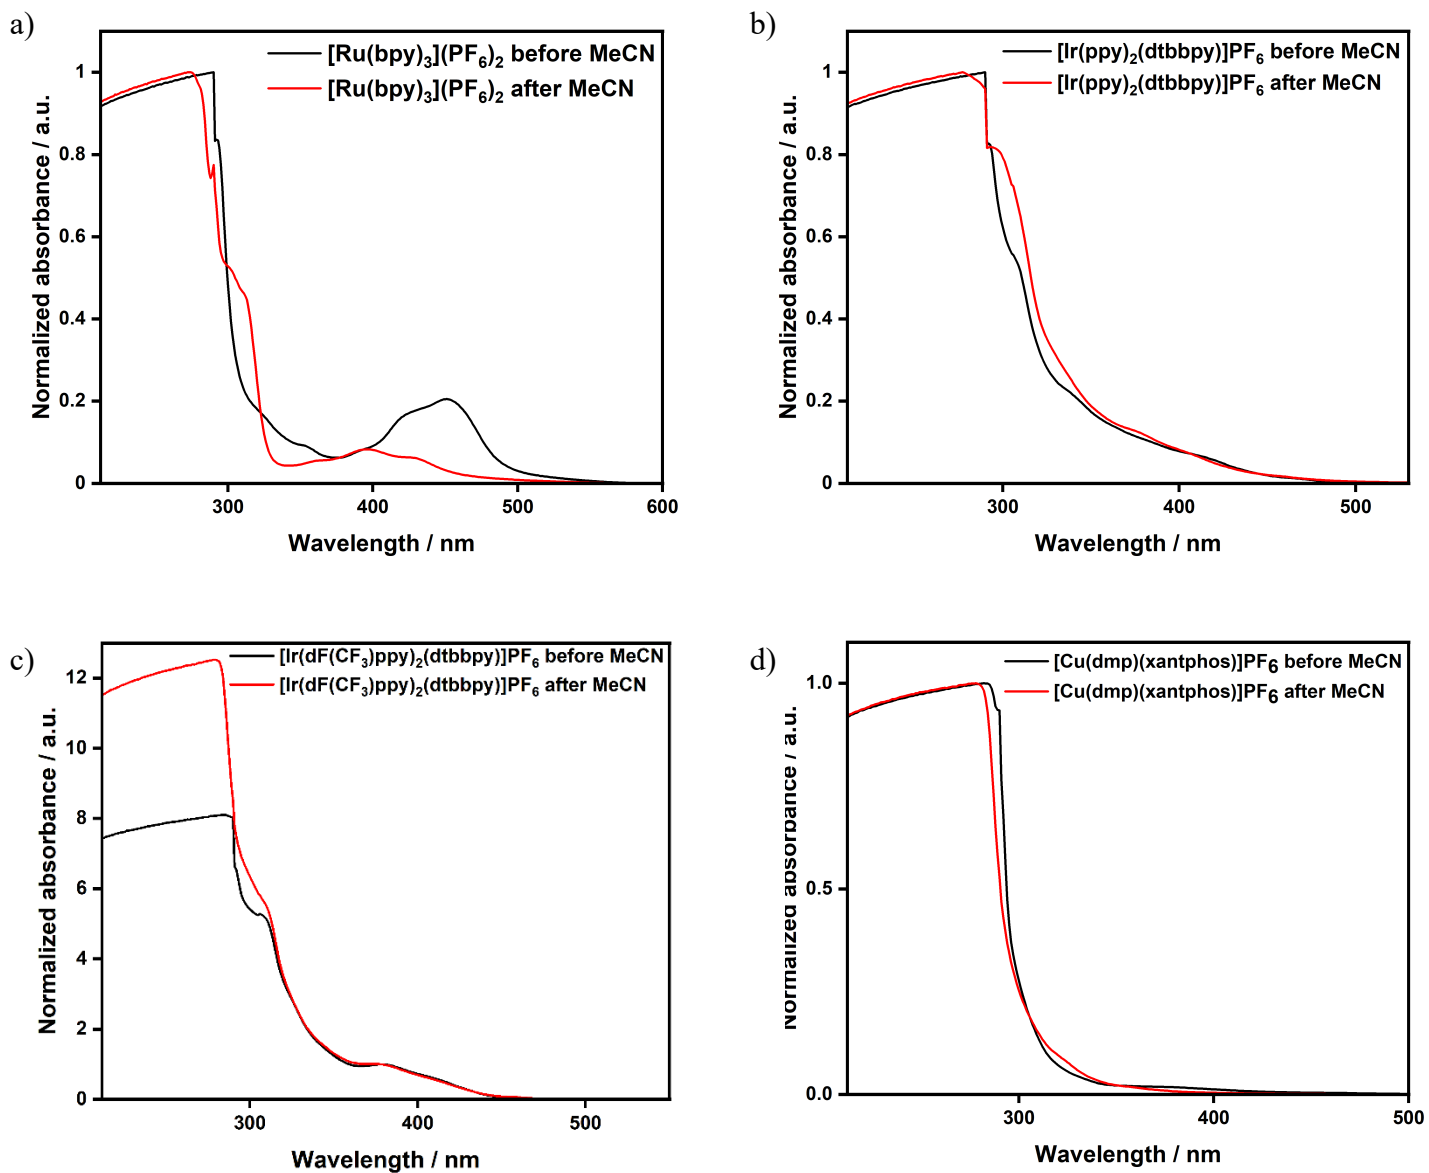

Figure S67. UV-vis absorption spectra before and after irradiation for the ATRA reaction using a) [Ru(bpy)<sub>3</sub>](PF<sub>6</sub>)<sub>2</sub>, b) [Ir(ppy)<sub>2</sub>(dtbbpy)]PF<sub>6</sub>, c) [Ir(dF(CF<sub>3</sub>)ppy)<sub>2</sub>(dtbbpy)]PF<sub>6</sub> and d) [Cu(dmp)(xantphos)]PF<sub>6</sub> as the PC. Absorbance is normalized with respect to the peak at 378 nm for c).

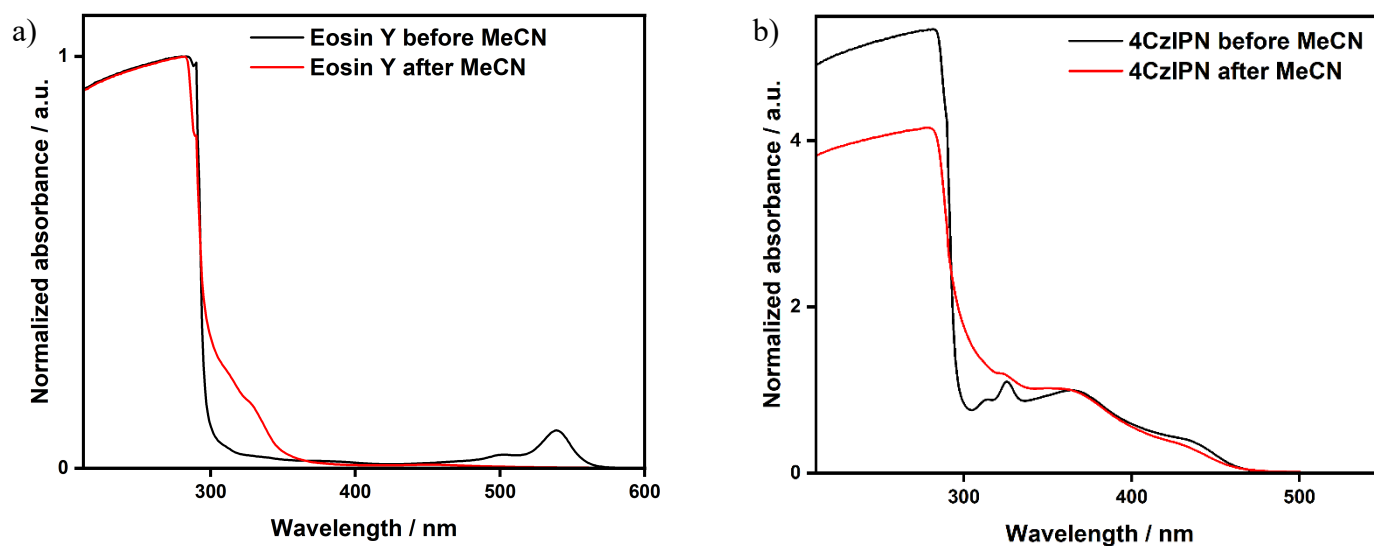

Figure S68. V-vis absorption spectra before and after irradiation for the ATRA reaction using a) **Eosin Y** and b) **4CzIPN** as the PC. Absorbance is normalized with respect to the peak at 364 nm for b).

*Giese type addition:*

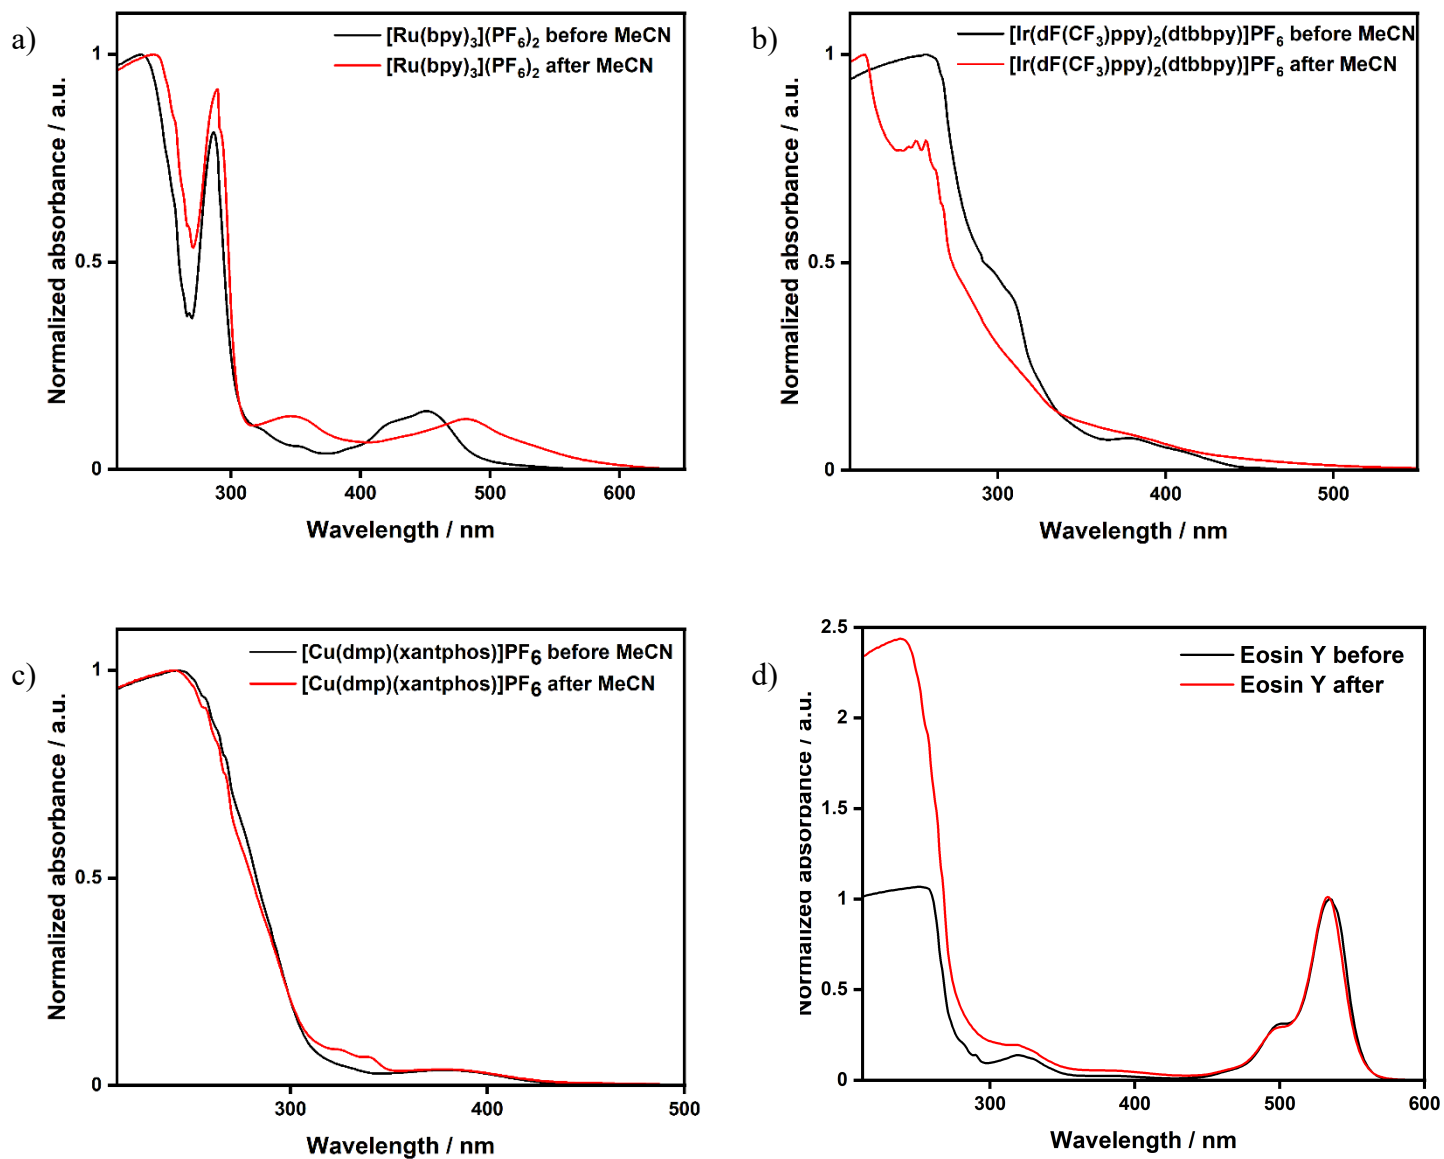

Figure S69. UV-vis absorption spectra before and after irradiation for the Giese-type addition using a) **[Ru(bpy)<sub>3</sub>](PF<sub>6</sub>)<sub>2</sub>**, b) **[Ir(dF(CF<sub>3</sub>)ppy)<sub>2</sub>(dtbbpy)]PF<sub>6</sub>**, c) **[Cu(dmp)(xantphos)]PF<sub>6</sub>** and d) **Eosin Y** as the PC. Absorbance is normalized with respect to the peak at 535 nm for d).

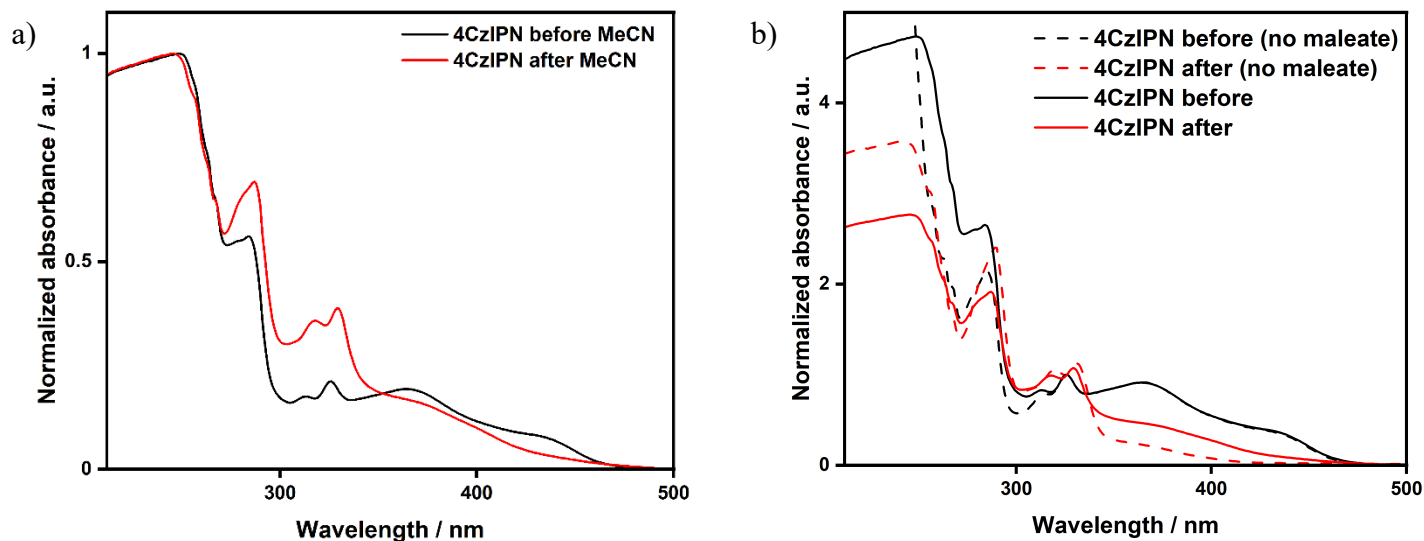

Figure S70. a) UV-vis absorption spectra before and after irradiation for the Giese-type addition using **4CzIPN** as the PC and b) the comparison to the UV-vis absorption spectra before and after irradiation for the Giese-type addition using **4CzIPN** as the PC in the absence of the diethyl maleate radical acceptor. In b), the UV-vis absorption spectra are all normalized with respect to the peak at 326 nm.

Figure S69b indicates that in the absence of a radical acceptor (diethyl maleate), the UV-vis absorption profile after irradiation using **4CzIPN** as the PC is significantly more blue-shifted. This is in accordance with literature studies that have shown that after decarboxylation, the alkyl radical generated from carboxylic acids (N-Cbz-Pro in this case), photosubstitutes one of the CN groups of **4CzIPN**.<sup>51</sup> In the presence of a radical acceptor (diethyl maleate in this case), less photosubstitution occurs, as reflected in the less blue-shifted UV-vis absorption profile after irradiation, since the alkyl radical can instead be trapped by the radical acceptor.

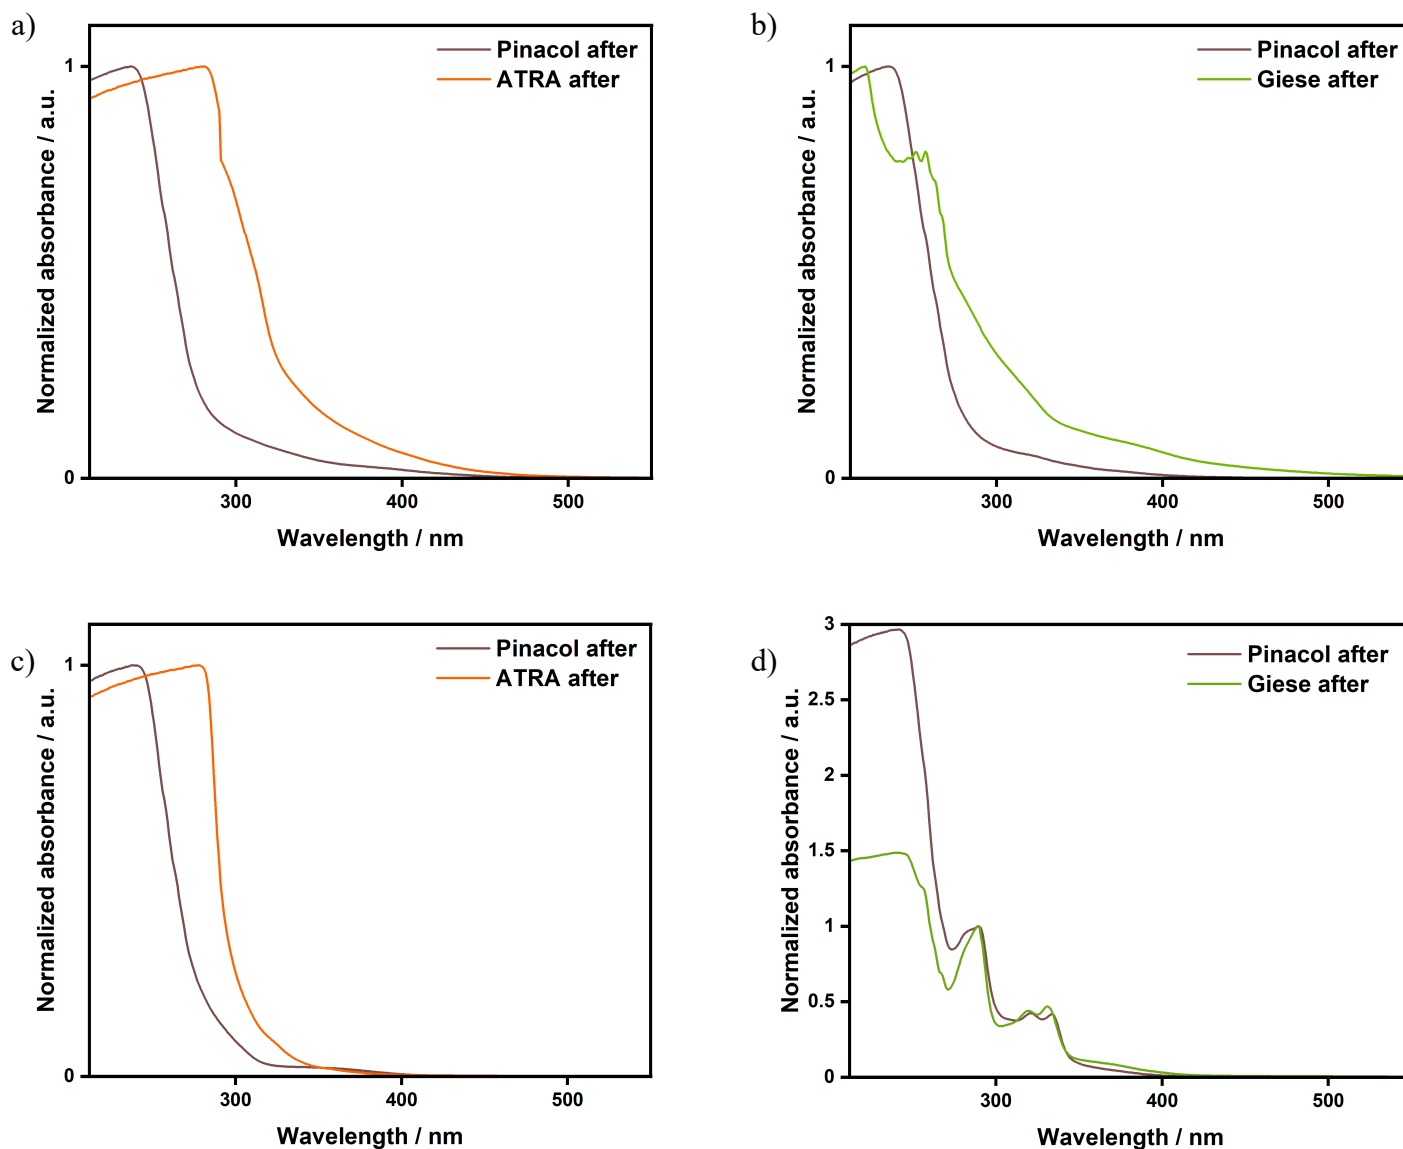

Figure S71. UV-vis absorption spectra after irradiation for the a combination of the pinacol coupling, ATRA or Giese-type addition in MeCN using a)  $[\text{Ir}(\text{ppy})_2(\text{dtbbpy})]\text{PF}_6$ , b)  $[\text{Ir}(\text{dF}(\text{CF}_3)\text{ppy})_2(\text{dtbbpy})]\text{PF}_6$ , c)  $[\text{Cu}(\text{dmp})(\text{xantphos})]\text{PF}_6$  and d) 4CzIPN as the PC. Absorbance is normalized with respect to the peak at 290 nm for d).

*E/Z isomerisation:*

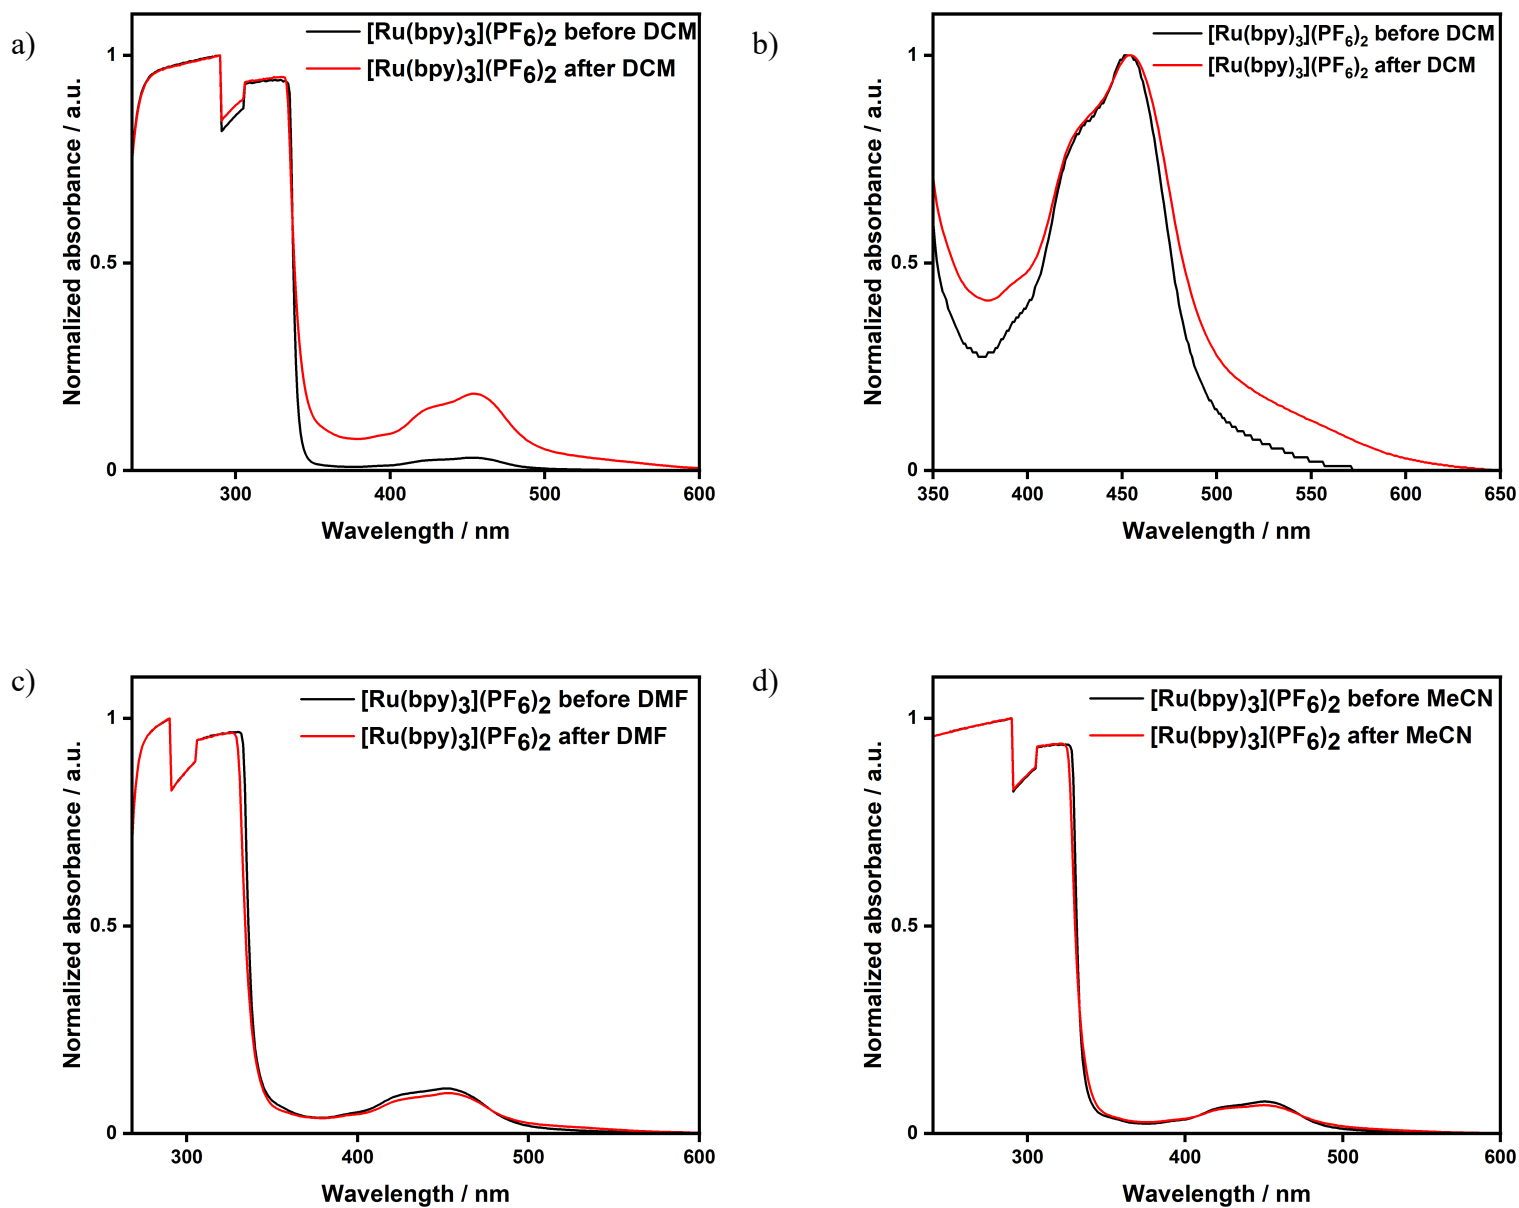

Figure S72. UV-vis absorption spectra before and after irradiation for the *E/Z* isomerization of stilbene using  $[\text{Ru}(\text{bpy})_3](\text{PF}_6)_2$  as the PC in a) DCM, b) DCM (normalized with respect to the peak at 455 nm), c) DMF and d) MeCN. Due to poor solubility in THF, suitable UV-vis absorption spectra could not be obtained.

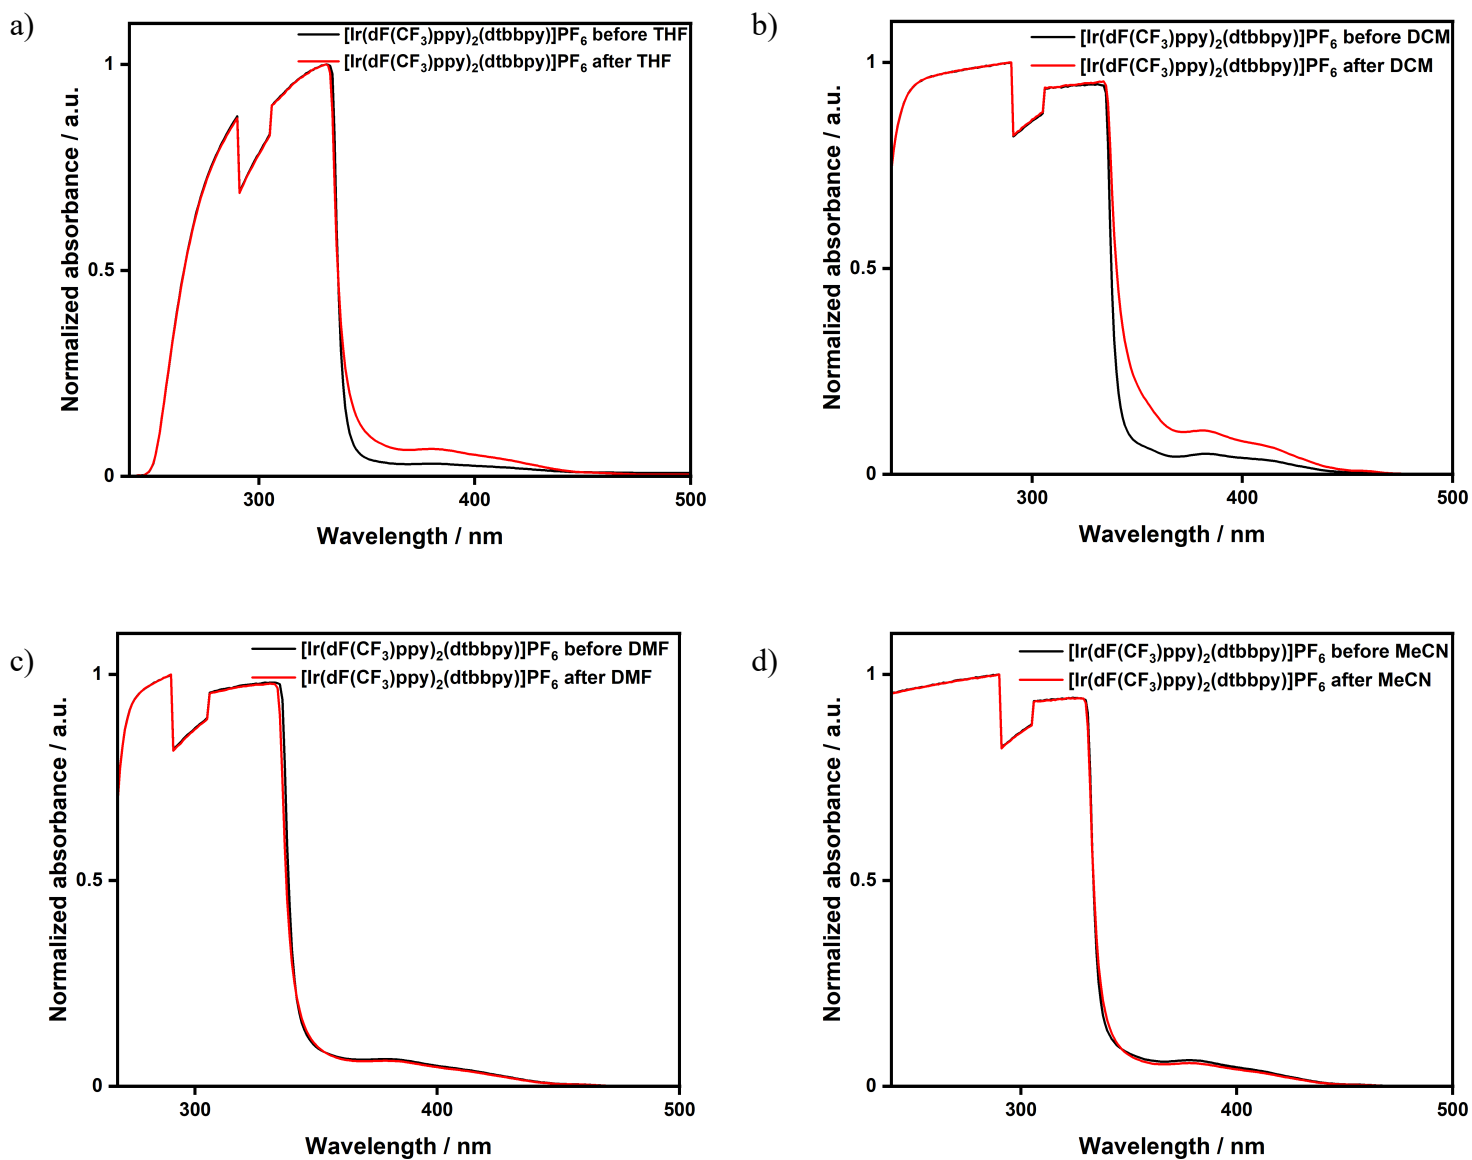

Figure S73. UV-vis absorption spectra before and after irradiation for the *E/Z* isomerization of stilbene using  $[\text{Ir}(\text{dF}(\text{CF}_3)\text{ppy})_2(\text{dtbbpy})]\text{PF}_6$  as the PC in a) THF, b) DCM, c) DMF and d) MeCN.



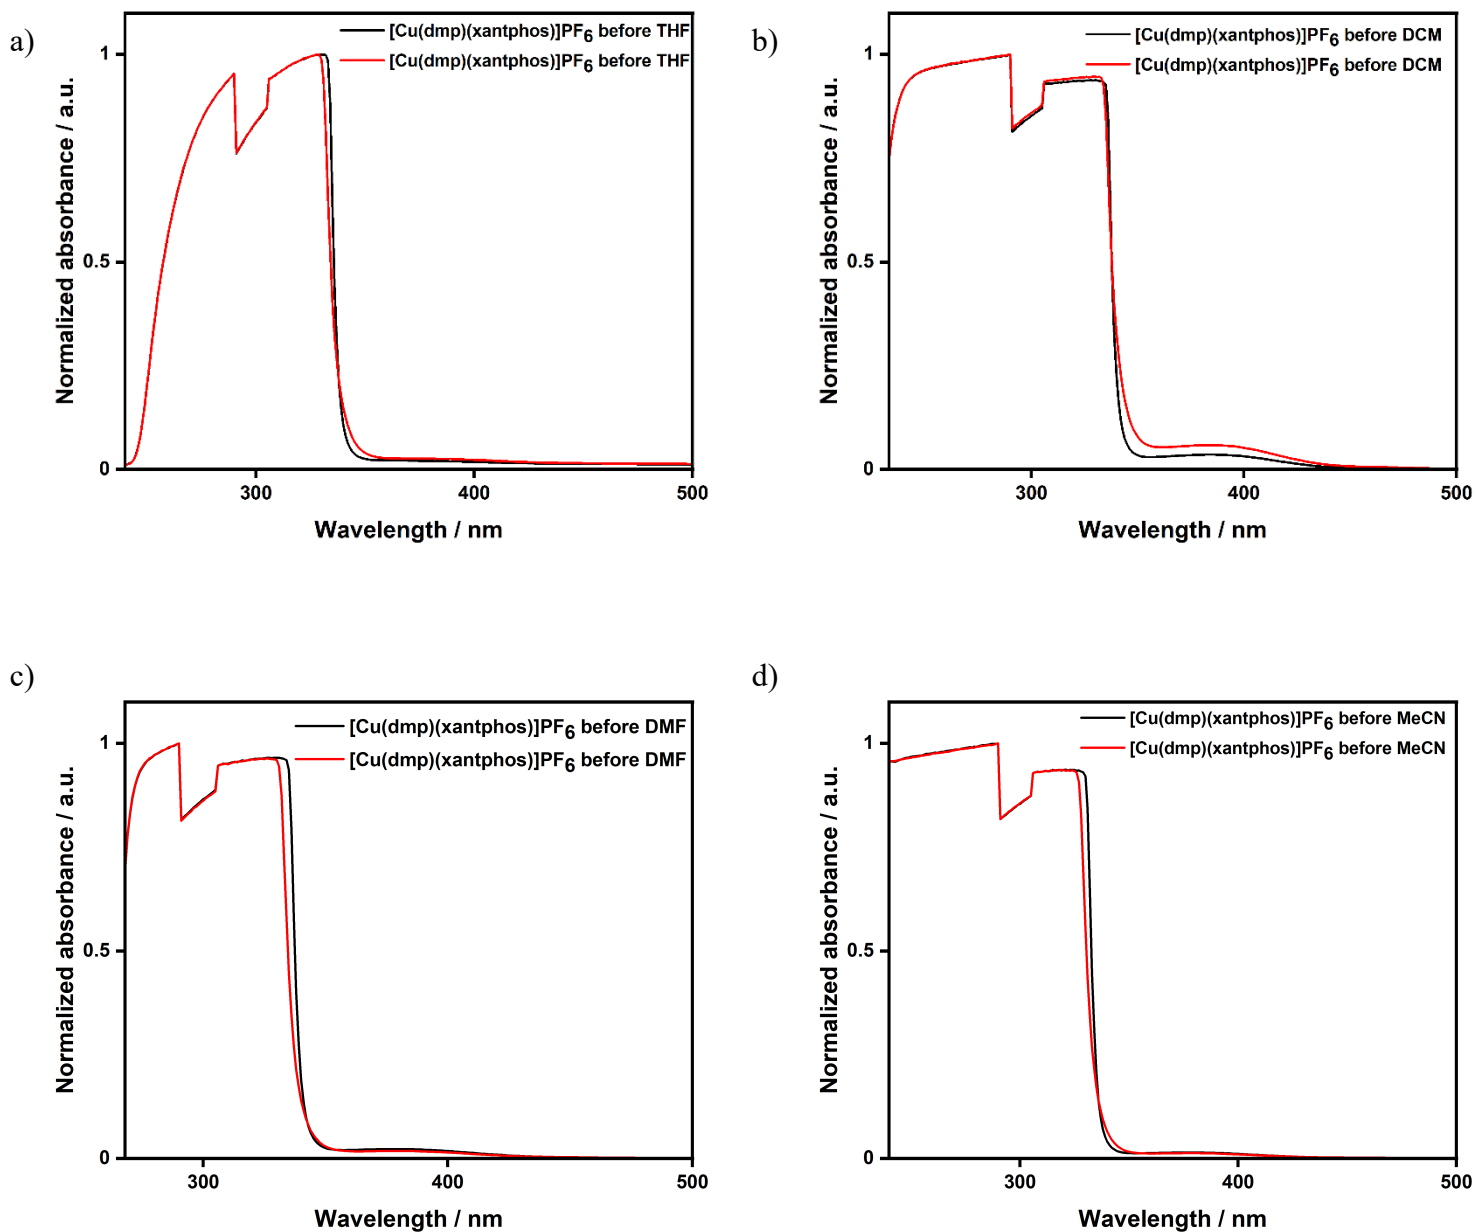

Figure S74. UV-vis absorption spectra before and after irradiation for the *E/Z* isomerization of stilbene using  $[\text{Cu}(\text{dmp})(\text{xantphos})]\text{PF}_6$  as the PC in a) THF, b) DCM, c) DMF and d) MeCN.

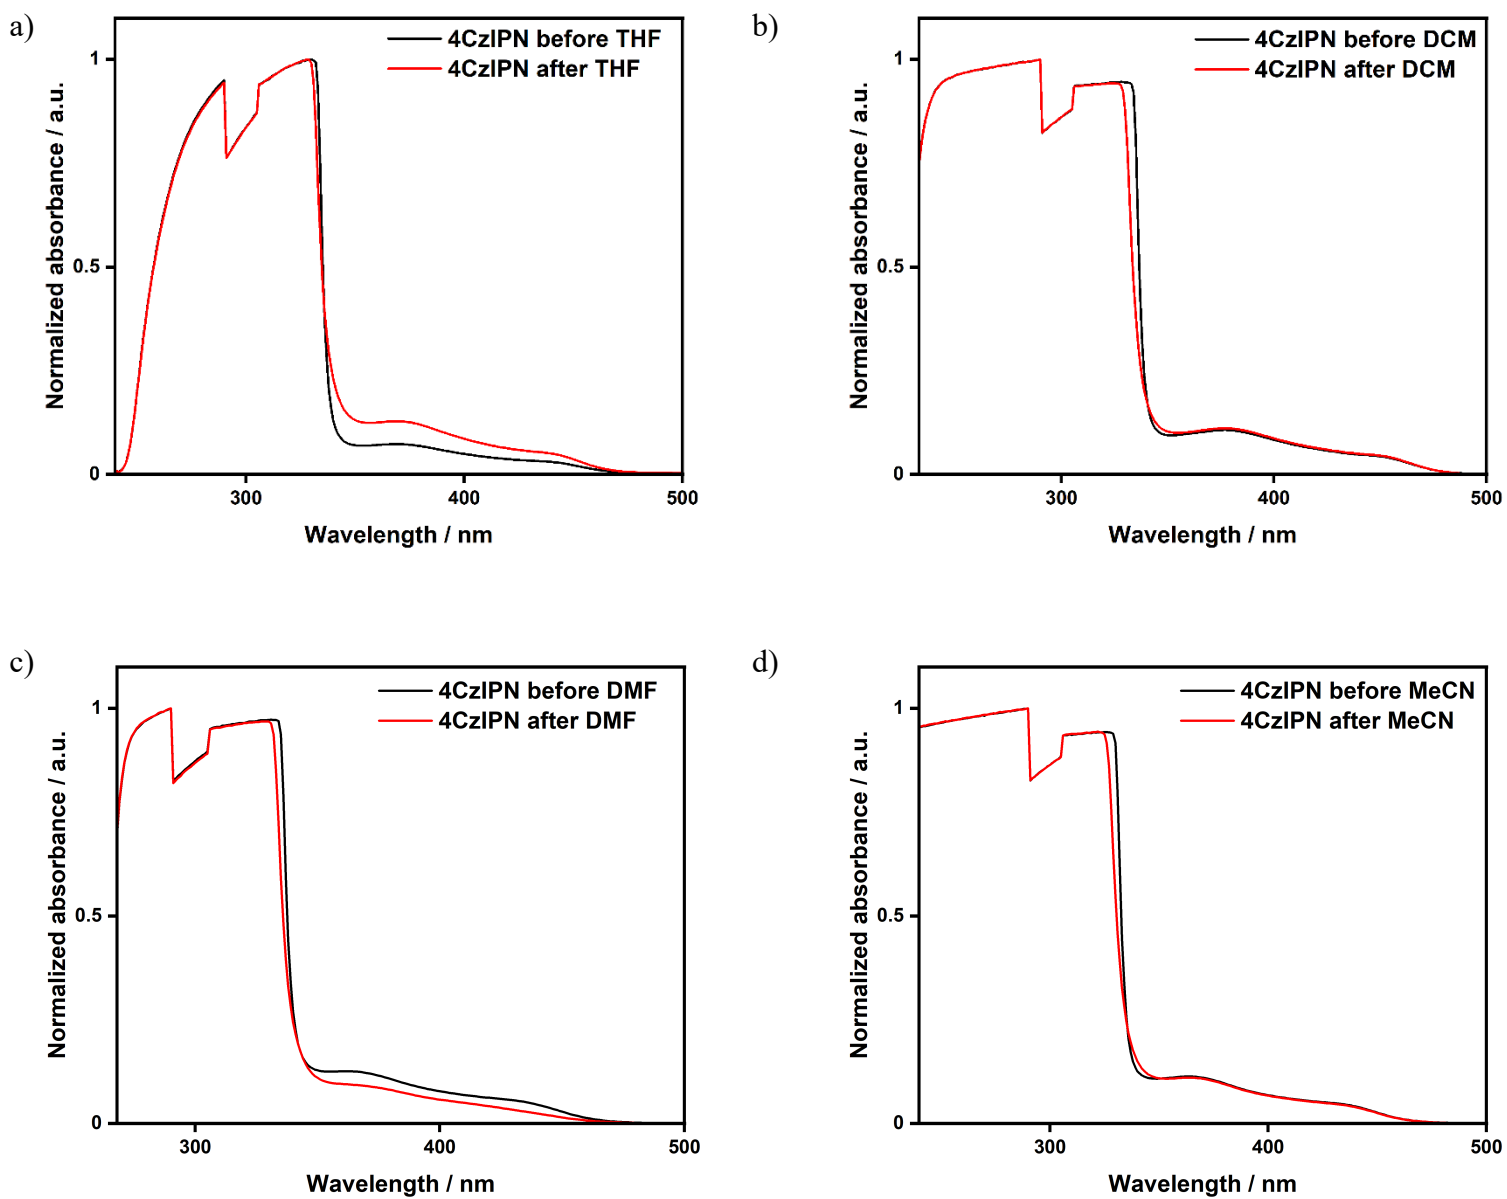

Figure S75. UV-vis absorption spectra before and after irradiation for the *E/Z* isomerization of stilbene using 4CzIPN as the PC in a) THF, b) DCM, c) DMF and d) MeCN.

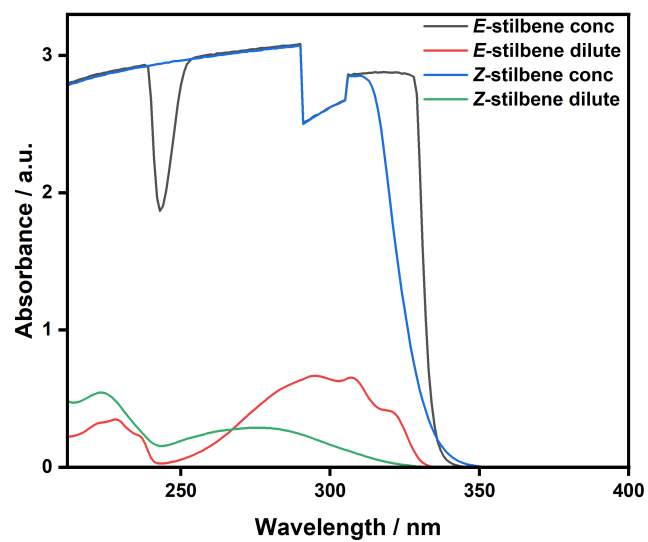

Figure S76. UV-vis absorption spectra of *E* and *Z* stilbene using a concentrated solution ( $1 \times 10^{-3}$  M) and dilute solution ( $2 \times 10^{-5}$  M) in MeCN.

[2+2] cycloaddition:

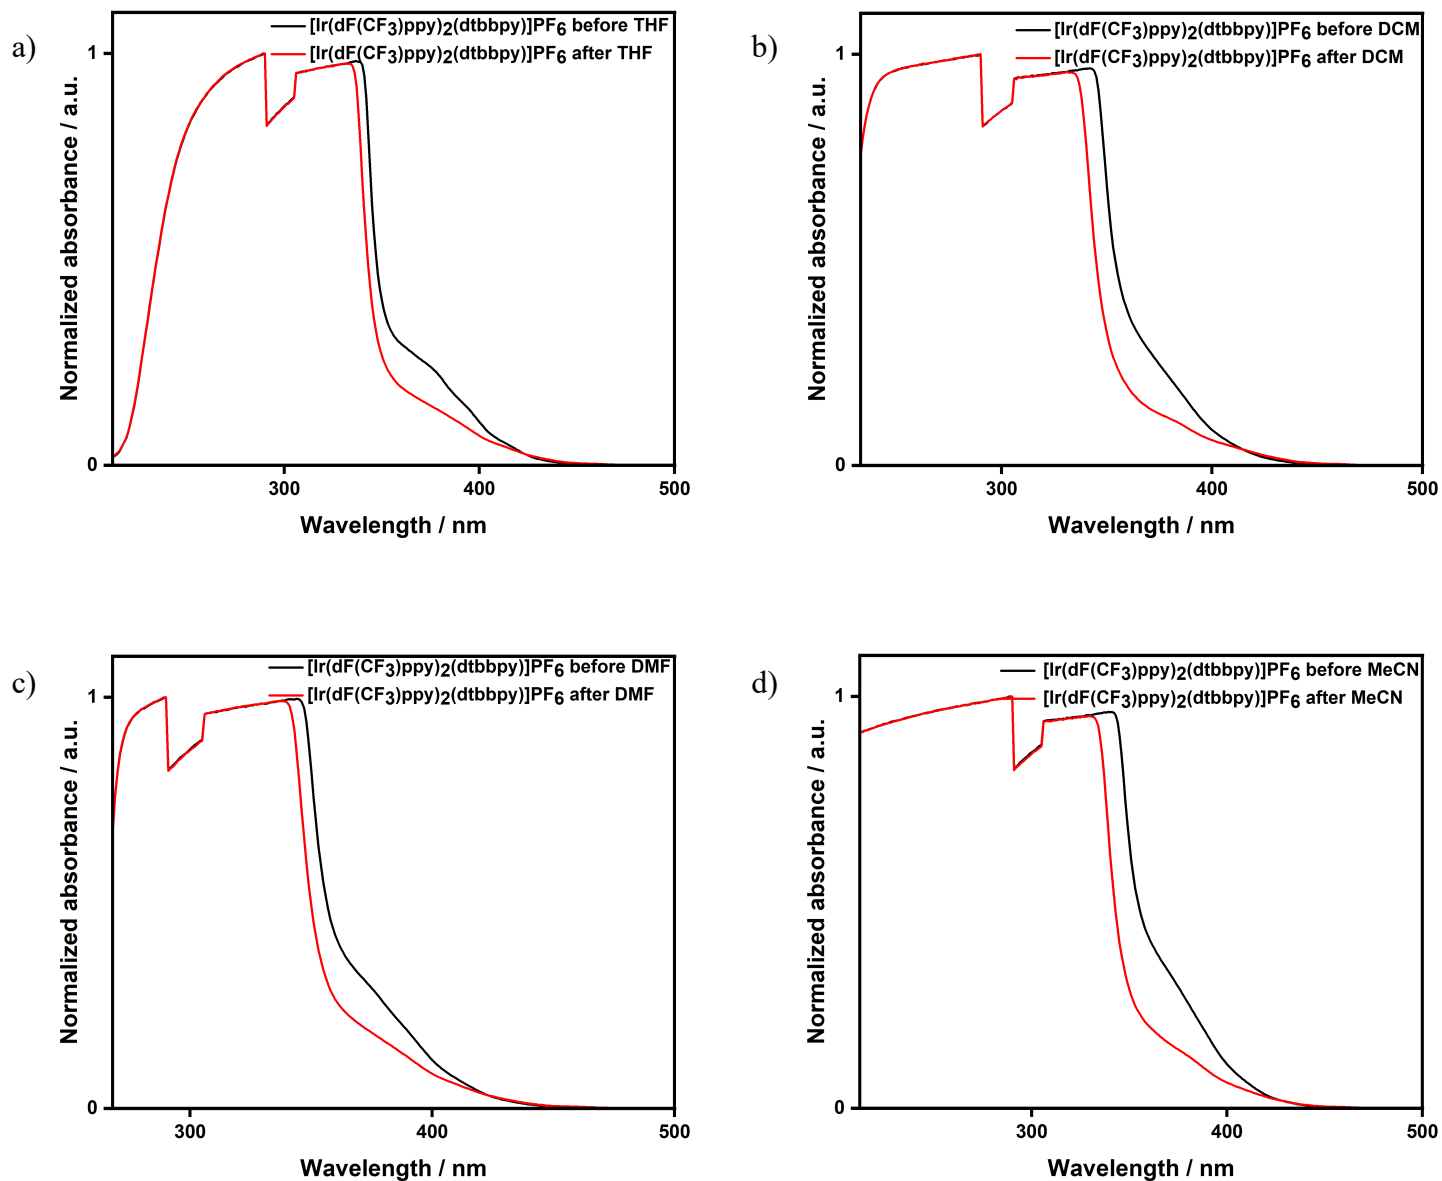

Figure S77. UV-vis absorption spectra before and after irradiation for the [2+2] cycloaddition of chalcone using  $[\text{Ir}(\text{dF}(\text{CF}_3)\text{ppy})_2(\text{dtbbpy})]\text{PF}_6$  as the PC in a) THF, b) DCM, c) DMF and d) MeCN.

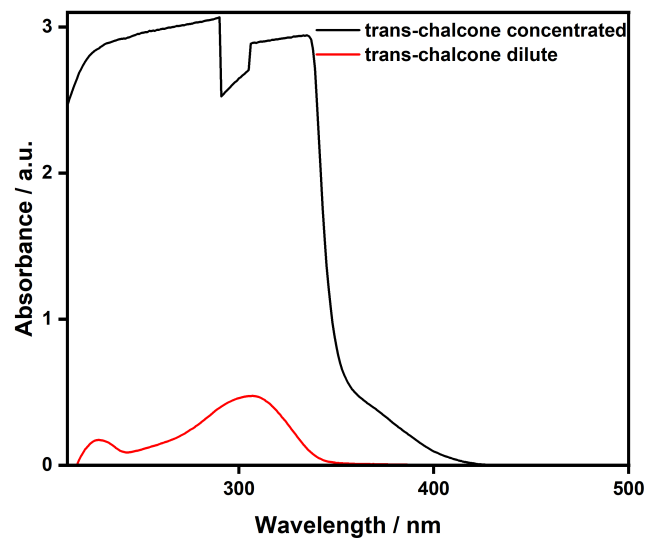

Figure S78. UV-vis absorption spectra of trans-chalcone using a concentrated solution ( $1 \times 10^{-3}$  M) and dilute solution ( $2 \times 10^{-5}$  M) in MeCN.

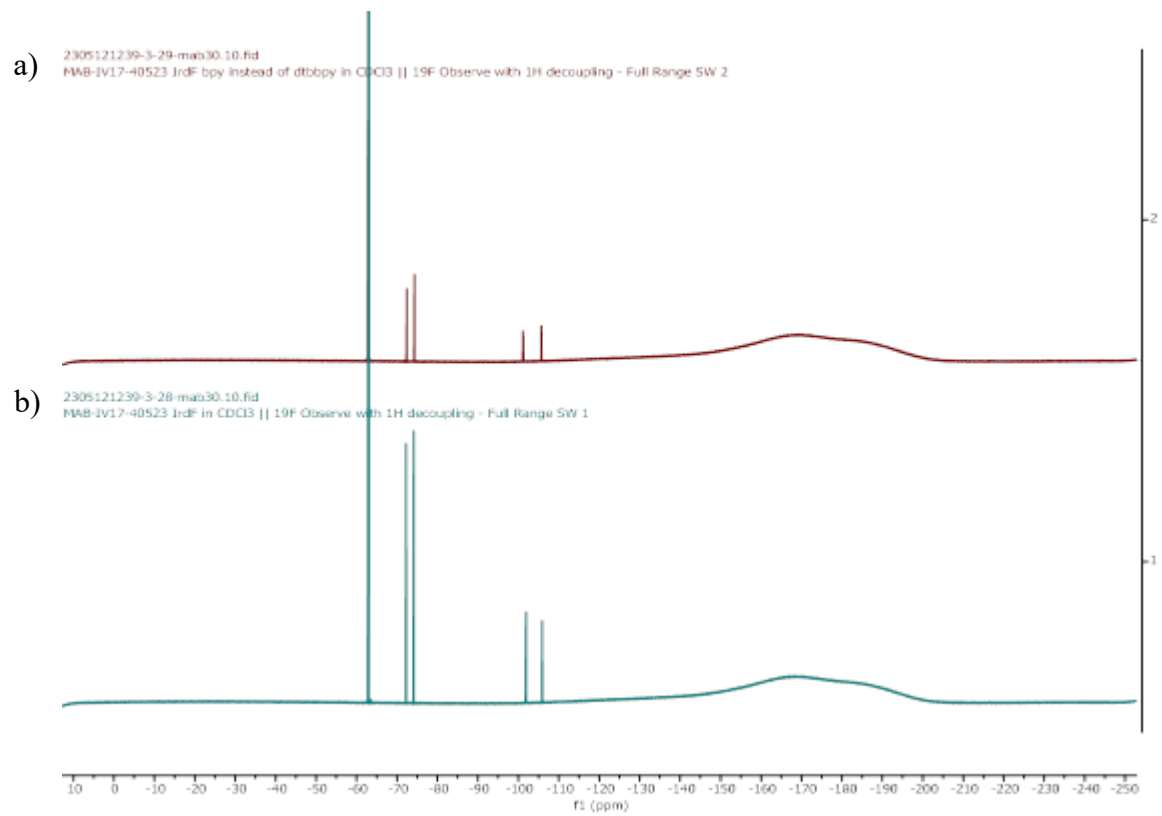

Figure S79.  $^{19}\text{F}$  NMR of a)  $[\text{Ir}(\text{dF}(\text{CF}_3)\text{ppy})_2(\text{bpy})]\text{PF}_6$  and b)  $[\text{Ir}(\text{dF}(\text{CF}_3)\text{ppy})_2(\text{dtbbpy})]\text{PF}_6$  in  $\text{CDCl}_3$ .

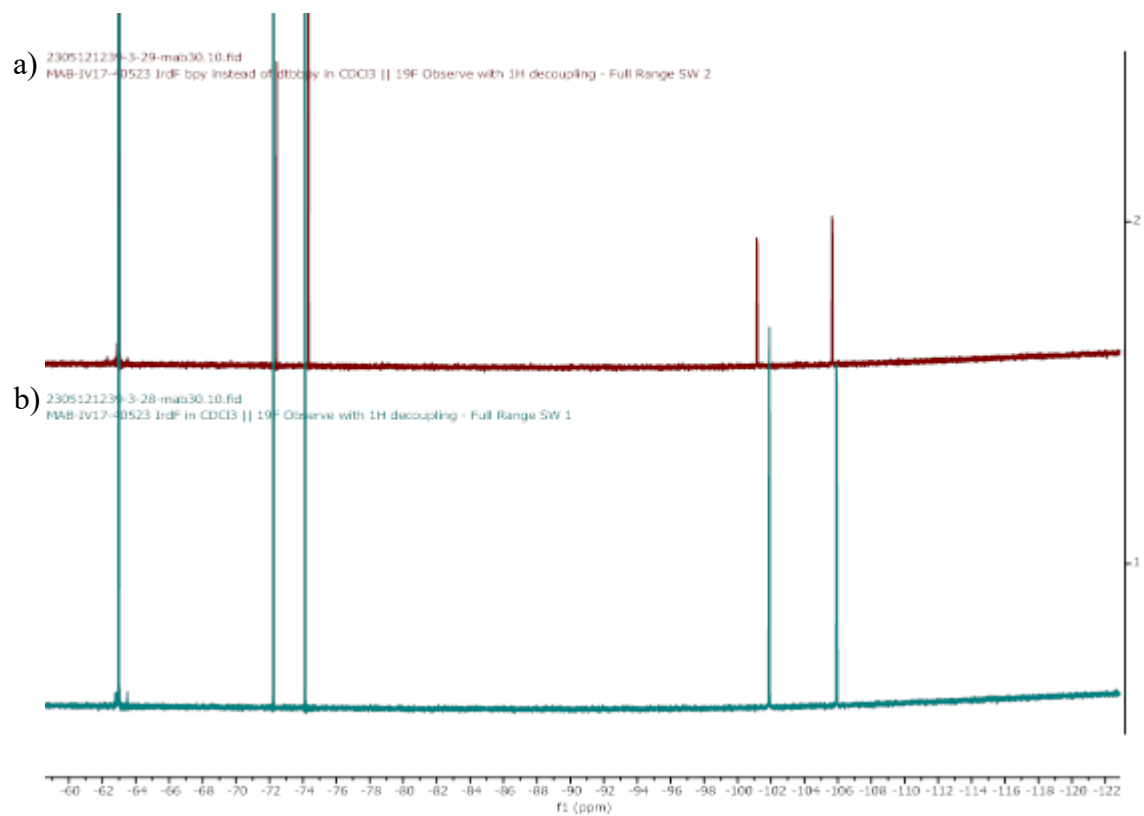

Figure S80.  $^{19}\text{F}$  NMR of a)  $[\text{Ir}(\text{dF}(\text{CF}_3)\text{ppy})_2(\text{bpy})]\text{PF}_6$  and b)  $[\text{Ir}(\text{dF}(\text{CF}_3)\text{ppy})_2(\text{dtbbpy})]\text{PF}_6$  in  $\text{CDCl}_3$  zoomed in.





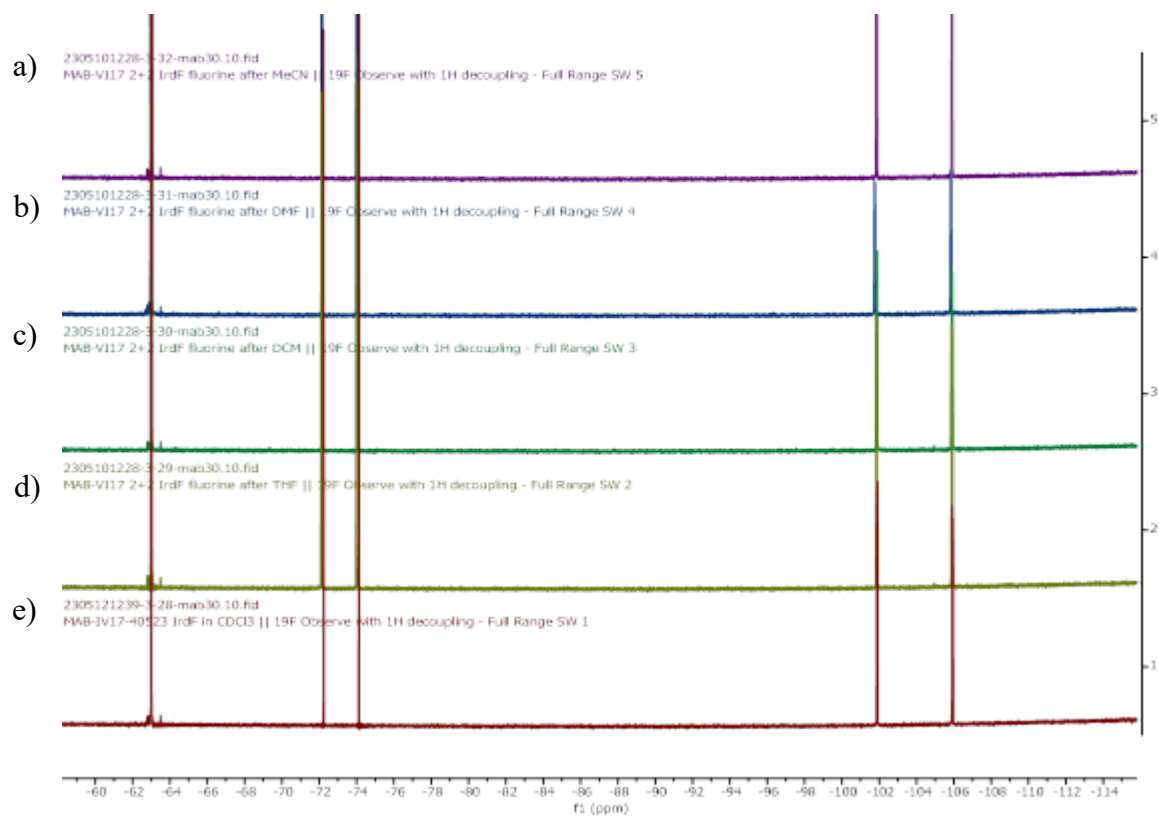

Figure S82.  $^{19}\text{F}$  NMR of the [2+2] cycloaddition of chalcone reaction mixtures after irradiation in a) THF, b) DCM, c) DMF and d) MeCN and e) the PC  $[\text{Ir}(\text{dF}(\text{CF}_3)\text{ppy})_2(\text{dtbbpy})]\text{PF}_6$  all in  $\text{CDCl}_3$  zoomed in.

## Photocatalysis

Photocatalysis experiments were conducted using a custom-built photoreactor, as shown in Figure S82, allowing for up to 8 parallel photochemical reactions (7 mL) at a time. The photochemistry reaction chamber is filled with mirrors to evenly distribute light. The reactor is placed upon a magnetic stirrer plate allowing for reactions to be completed with stirring. Reactions are irradiated using Kessil PR160 and PR160L LED sources. For Kessil PR160-390 nm and PR160L-456 nm, the power consumption maximum is 52 W and 50 W, respectively, with the average intensity measured from 1 cm distance being 399 mW cm<sup>-2</sup>. The intensity on each lamp is tuneable, with the maximum intensity selected for all photocatalytic reactions. A cooling fan is directed at the photoreactor to ensure the reaction mixture maintains at room temperature, which is further guaranteed by the presence of two fans on the photoreactor itself.

After the photoreactions were completed, the products were analysed by <sup>1</sup>H NMR spectroscopy using 1,3,5-trimethoxybenzene as an internal standard. All yields shown represent the mean yield from at least two reactions with the associated standard deviation.

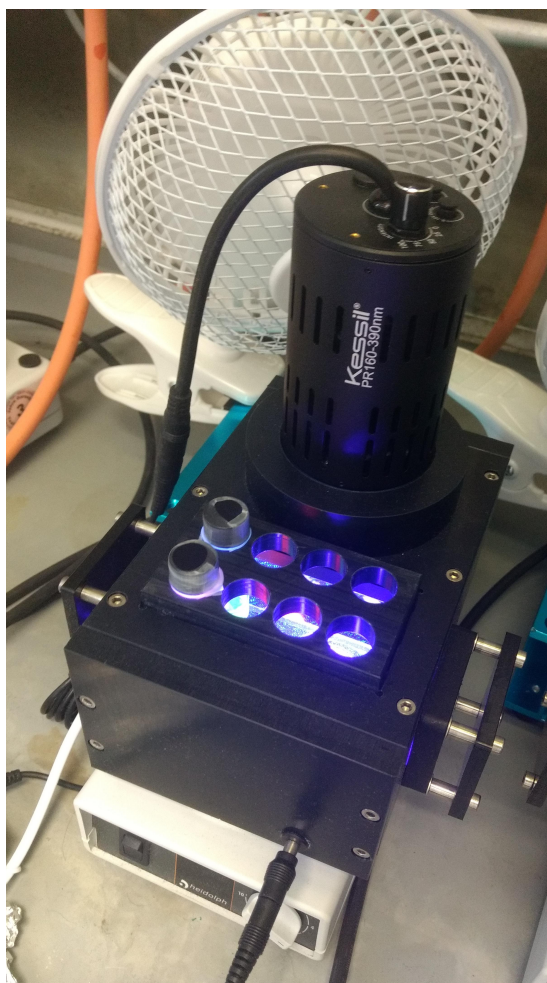

Figure S83. Experimental set-up for photocatalysis reactions.

Procedure for the pinacol coupling:

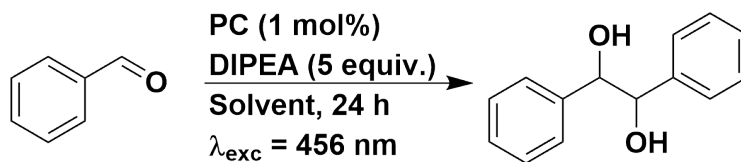

Figure S84. Reaction scheme for the pinacol coupling reaction.

To an oven-dried vial was added benzaldehyde (0.020 mL, 0.2 mmol, 1 equiv.), DIPEA (0.174 mL, 1 mmol, 5 equiv.) and photocatalyst (1 mol%, 0.002 mmol). The vial was purged with N<sub>2</sub> for 5 min and solvent (2.0 mL) was added before N<sub>2</sub> bubbling for 10 min. The solution was stirred at room temperature while being irradiated by Kessil lamp ( $\lambda_{\text{exc}} = 456 \text{ nm}$ ) for 2 or 24 hours. The solvent was removed under reduced pressure and the crude

reaction mixture was analysed by  $^1\text{H}$  NMR spectroscopy using 1,3,5-trimethoxybenzene as an internal standard.

Table S21.  $^1\text{H}$  NMR yields obtained for control reactions for the pinacol coupling.<sup>a</sup>

|                                                                 | $^1\text{H}$ NMR yield / % |     |     |      |
|-----------------------------------------------------------------|----------------------------|-----|-----|------|
|                                                                 | THF                        | DCM | DMF | MeCN |
| None                                                            | 0                          | 0   | 0   | 0    |
| <b>[Ir(ppy)<sub>2</sub>(dtbbpy)]PF<sub>6</sub></b> <sup>b</sup> | 2                          | 0   | 0   | 0    |

<sup>a</sup> Yields determined by  $^1\text{H}$ -NMR analysis of the crude reaction mixture using 1,3,5-trimethoxybenzene as the internal standard. Yields provided are the sum of the meso:dl isomers. The reaction was conducted for 24 h. <sup>b</sup> Reaction conducted in the absence of amine.

Procedure for the ATRA:

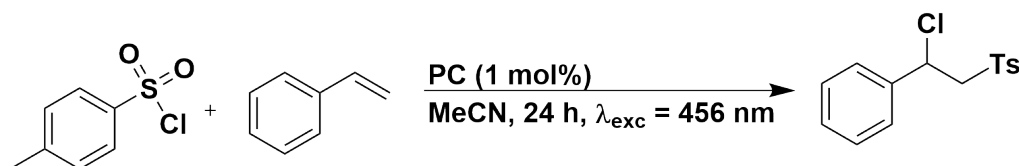

Figure S85. Reaction scheme for the ATRA reaction.

To an oven-dried vial was added *p*-toluenesulfonyl chloride (48 mg, 0.25 mmol, 1 equiv.) styrene (0.034 mL, 0.5 mmol, 1.2 equiv.) and photocatalyst (1 mol%, 0.0025 mmol). The vial was purged with  $\text{N}_2$  for 5 min and dry MeCN (1.0 mL) was added before further  $\text{N}_2$  purging for 10 min. The solution was stirred at room temperature while being irradiated by Kessil lamp ( $\lambda_{\text{exc}} = 456 \text{ nm}$ ) for 24 hours. The solvent was removed under reduced pressure and the crude reaction mixture was analysed by  $^1\text{H}$  NMR spectroscopy using 1,3,5-trimethoxybenzene as an internal standard.

Table S22.  $^1\text{H}$  NMR yields obtained the ATRA reaction.<sup>a</sup>

| PC                                                                   | $^1\text{H}$ NMR yield / %   |
|----------------------------------------------------------------------|------------------------------|
| None                                                                 | 0                            |
| <b>[Ru(bpy)<sub>3</sub>](PF<sub>6</sub>)<sub>2</sub></b>             | $75 \pm 5$ (80) <sup>b</sup> |
| <b>[Ir(ppy)<sub>2</sub>(dtbbpy)]PF<sub>6</sub></b>                   | $74 \pm 3$                   |
| <b>[Ir(dF(CF<sub>3</sub>)ppy)<sub>2</sub>(dtbbpy)]PF<sub>6</sub></b> | $3 \pm 1$ (7) <sup>b</sup>   |

|                                          |        |
|------------------------------------------|--------|
| <b>[Cu(dmp)(xantphos)]PF<sub>6</sub></b> | 86 ± 4 |
| <b>Eosin Y</b>                           | 3 ± 2  |
| <b>4CzIPN</b>                            | 3 ± 0  |

<sup>a</sup> Yields determined by <sup>1</sup>H NMR analysis of the crude reaction mixture using 1,3,5-trimethoxybenzene as the internal standard. Yields in parentheses correspond to literature yields and are reference accordingly. Yield taken from Ref <sup>52</sup> obtained using 1 equiv. of styrene and 455 nm LEDs in MeCN.

Procedure for the Giese type addition:

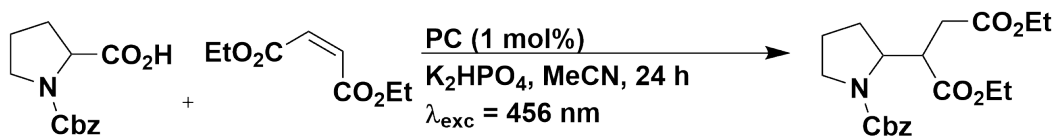

Figure S86. Reaction scheme for the Giese type addition reaction.

To an oven-dried vial was added N-Cbz-Pro (50 mg, 0.2 mmol, 1 equiv.), K<sub>2</sub>HPO<sub>4</sub> (38 mg, 0.22 mmol, 1.1 equiv.), diethyl maleate (0.036 mL, 0.22 mmol, 1.1 equiv.) and photocatalyst (1 mol%, 0.002 mmol). The vial was purged with N<sub>2</sub> for 5 min and dry MeCN (4.0 mL) was added before further N<sub>2</sub> purging for 10 min. The solution was stirred at room temperature while being irradiated by Kessil lamp (λ<sub>exc</sub> = 456 nm) for 24 hours. The solvent was removed under reduced pressure and the crude reaction mixture was analysed by <sup>1</sup>H NMR spectroscopy using 1,3,5-trimethoxybenzene as an internal standard.

Table S23. <sup>1</sup>H NMR yields obtained for the Giese type addition reaction.<sup>a</sup>

| PC                                                                   | <sup>1</sup> H NMR yield / % |
|----------------------------------------------------------------------|------------------------------|
| None                                                                 | 0                            |
| <b>[Ru(bpy)<sub>3</sub>](PF<sub>6</sub>)<sub>2</sub></b>             | 0 ± 0                        |
| <b>[Ir(dF(CF<sub>3</sub>)ppy)<sub>2</sub>(dtbbpy)]PF<sub>6</sub></b> | 73 ± 5                       |
| <b>[Cu(dmp)(xantphos)]PF<sub>6</sub></b>                             | 0 ± 0                        |
| <b>Eosin Y</b>                                                       | Trace                        |
| <b>4CzIPN</b>                                                        | 77 ± 2 (80) <sup>b</sup>     |

<sup>a</sup> Yields determined by <sup>1</sup>H NMR analysis of the crude reaction mixture using 1,3,5-trimethoxybenzene as the internal standard. Yields in parentheses correspond to literature yields

and are reference accordingly. <sup>b</sup> Yield taken from Ref <sup>42</sup> obtained using 455 nm LEDs and is an isolated yield.

Procedure for the *E/Z* or *Z/E* isomerization of stilbene:

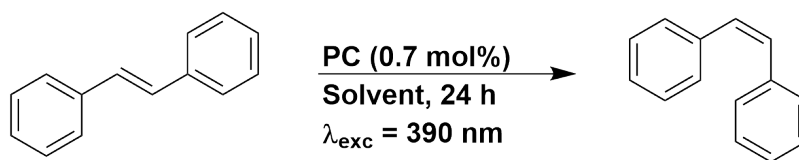

Figure S87. Reaction scheme for the *E/Z* isomerisation of *E*-stilbene.

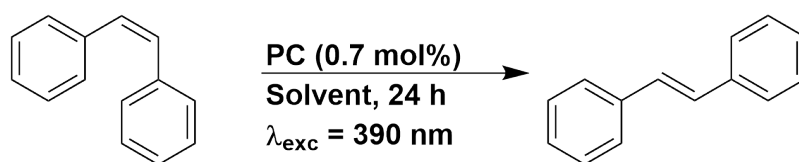

Figure S88. Reaction scheme for the *Z/E* isomerisation of *Z*-stilbene.

To an oven-dried vial was added *E*-stilbene (36 mg, 0.2 mmol, 1 equiv.) or *Z*-stilbene (36  $\mu\text{L}$ , 0.2 mmol, 1 equiv.) and photocatalyst (0.7 mol%, 0.0014 mmol). The vial was purged with  $\text{N}_2$  for 5 min and solvent (1.0 mL) was added before further  $\text{N}_2$  purging for 10 min. The solution was stirred at room temperature while being irradiated by Kessil lamp ( $\lambda_{\text{exc}} = 390 \text{ nm}$ ) for 24 hours. The solvent was removed under reduced pressure and the crude reaction mixture was analysed by  $^1\text{H}$  NMR spectroscopy using 1,3,5-trimethoxybenzene as an internal standard.

Table S24.  $^1\text{H}$  NMR yields obtained for control reactions for the *E/Z* isomerisation of *E*-stilbene.<sup>a</sup>

|       | $^1\text{H}$ NMR yield / % |            |           |           |
|-------|----------------------------|------------|-----------|-----------|
|       | THF                        | DCM        | DMF       | MeCN      |
| No PC | $3 \pm 2$                  | $19 \pm 4$ | $8 \pm 1$ | $6 \pm 1$ |

<sup>a</sup> Yields determined by  $^1\text{H}$  NMR analysis of the crude reaction mixture using 1,3,5-trimethoxybenzene as the internal standard.

Table S25.  $^1\text{H}$  NMR yields obtained for the *Z/E* isomerisation of *Z*-stilbene.<sup>a</sup>

| PC                                         | $^1\text{H}$ NMR yield / % |
|--------------------------------------------|----------------------------|
| $[\text{Ru}(\text{bpy})_3](\text{PF}_6)_2$ | $7 \pm 1$                  |

<sup>a</sup> Yields determined by <sup>1</sup>H NMR analysis of the crude reaction mixture using 1,3,5-trimethoxybenzene as the internal standard.

Z-stilbene was formed by scaling up the aforementioned procedure. *E*-stilbene (504 mg, 2.8 mmol, 1 equiv.) and [Ru(bpy)<sub>3</sub>](PF<sub>6</sub>)<sub>2</sub> (16.8 mg, 0.7 mol%, 0.02 mmol) were irradiated by Kessil lamp (λ<sub>exc</sub> = 390 nm) in THF (14 mL) for 24 h. Upon completion, the solvent was removed under reduced pressure and purified by flash column chromatography on silica gel (100% hexane) to afford the product as a colourless oil (351 mg, 70%). **R<sub>f</sub>**: 0.35 (hexane). <sup>1</sup>H NMR (400 MHz, CDCl<sub>3</sub>), δ (ppm): 7.29-7.16 (m, 10H), 6.64 (s, 2H). The <sup>1</sup>H NMR spectrum is consistent with that in the literature.<sup>53</sup>

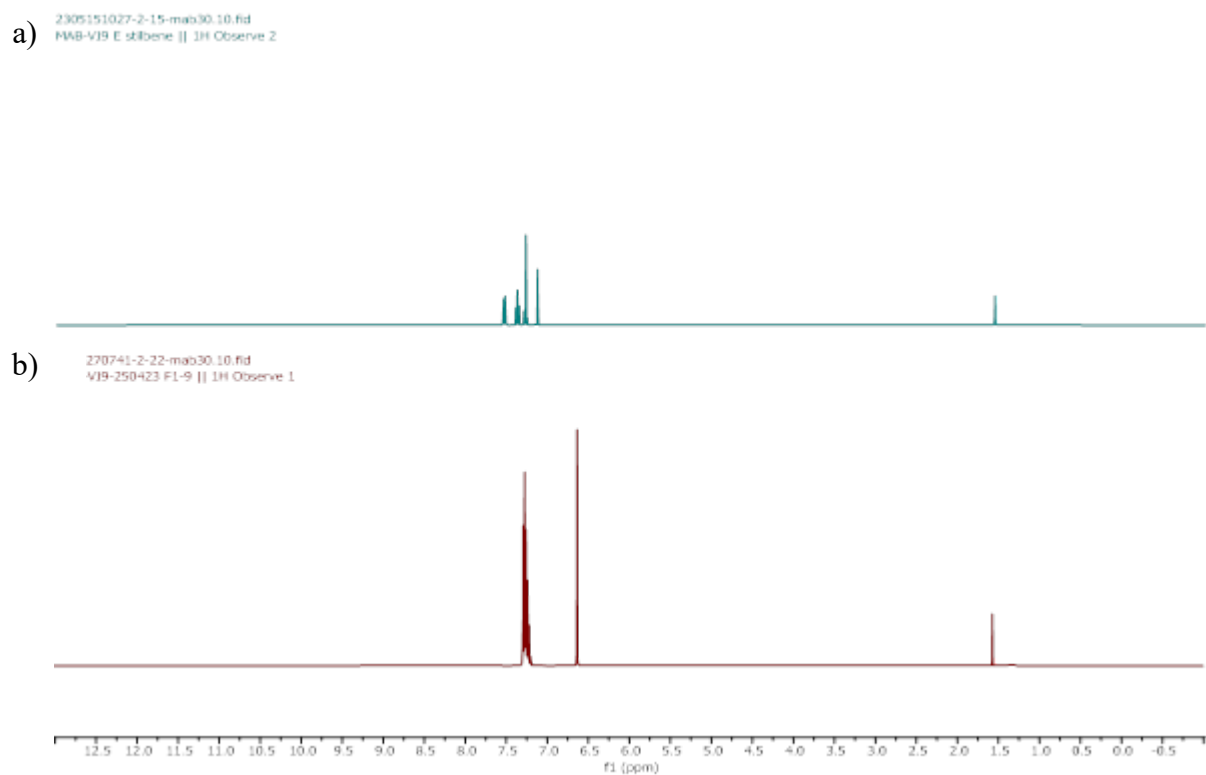

Figure S89. <sup>1</sup>H NMR spectra of a) *E*-stilbene and b) *Z*-stilbene, both in CDCl<sub>3</sub>.

Procedure for [2+2] cycloaddition:

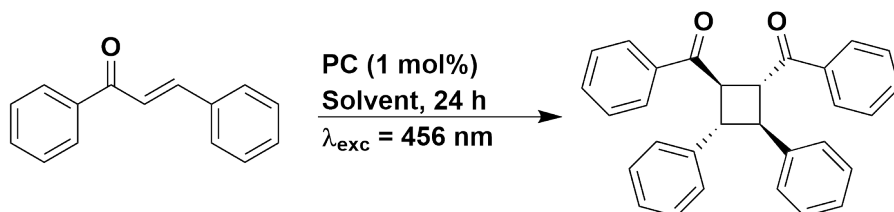

Figure S90. Reaction scheme for the [2+2] cycloaddition reaction.

To an oven-dried vial was added *trans*-chalcone (42 mg, 0.2 mmol, 1 equiv.) and photocatalyst (1 mol%, 0.002 mmol). The vial was purged with N<sub>2</sub> for 5 min and solvent (2.0 mL) was added before further N<sub>2</sub> purging for 10 min. The solution was stirred at room temperature while being irradiated by Kessil lamp ( $\lambda_{\text{exc}} = 456 \text{ nm}$ ) for 24 hours. The solvent was removed under reduced pressure and the crude reaction mixture was analysed by <sup>1</sup>H NMR spectroscopy using 1,3,5-trimethoxybenzene as an internal standard.

Table S26. <sup>1</sup>H NMR yields obtained for [2+2] cycloaddition reaction.<sup>a</sup>

|                                                                      | <sup>1</sup> H NMR yield / % |        |        |        |
|----------------------------------------------------------------------|------------------------------|--------|--------|--------|
|                                                                      | THF                          | DCM    | DMF    | MeCN   |
| No PC                                                                | 2                            | 1      | 1      | 1      |
| <b>[Ir(dF(CF<sub>3</sub>)ppy)<sub>2</sub>(dtbbpy)]PF<sub>6</sub></b> | 40 ± 4                       | 37 ± 2 | 22 ± 2 | 31 ± 3 |

<sup>a</sup> Yields determined by <sup>1</sup>H NMR analysis of the crude reaction mixture using 1,3,5-trimethoxybenzene as the internal standard.



# NMR spectra

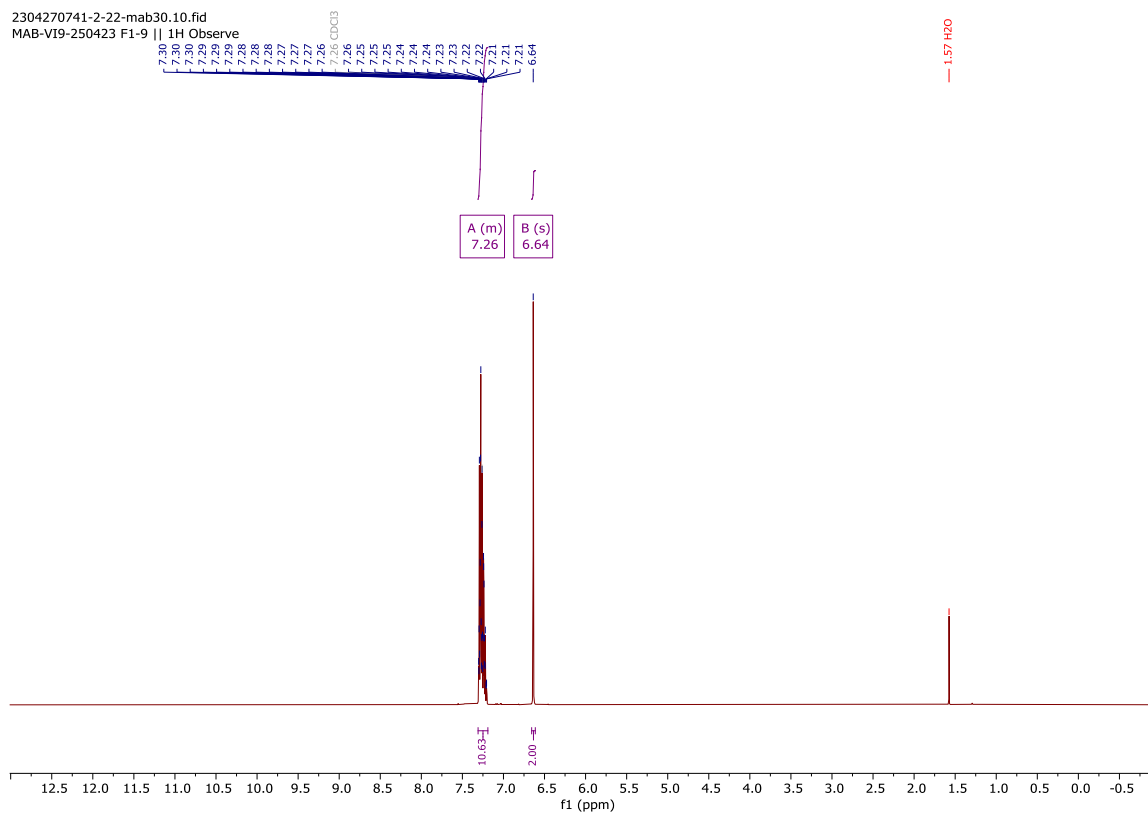

Figure S91. <sup>1</sup>H NMR spectra of Z-stilbene in CDCl<sub>3</sub>.

## References

- 1 C. Hu and Y. Chen, *Org. Chem. Front.*, 2015, **2**, 1352–1355.
- 2 S. Kim, J. Rojas-Martin and F. D. Toste, *Chem. Sci.*, 2016, **7**, 85–88.
- 3 D. Vasu, A. L. Fuentes de Arriba, J. A. Leitch, A. De Gombert and D. J. Dixon, *Chem. Sci.*, 2019, **10**, 3401–3407.
- 4 C. Minozzi, A. Caron, J. C. Grenier-Petel, J. Santandrea and S. K. Collins, *Angew. Chemie Int. Ed.*, 2018, **57**, 5477–5481.
- 5 M. K. Etherington, N. A. Kukhta, H. F. Higginbotham, A. Danos, A. N. Bismillah, D. R. Graves, P. R. McGonigal, N. Haase, A. Morherr, A. S. Batsanov, C. Pflumm, V. Bhalla, M. R. Bryce and A. P. Monkman, *J. Phys. Chem. C*, 2019, **123**, 11109–11117.
- 6 M. Y. Wong, S. Krotkus, G. Copley, W. Li, C. Murawski, D. Hall, G. J. Hedley, M. Jaricot, D. B. Cordes, A. M. Z. Slawin, Y. Olivier, D. Beljonne, L. Muccioli, M. Moral, M. C. Gather, I. D. W. Samuel and E. Zysman-colman, *ACS Appl. Mater. Interfaces*, 2018, **10**, 33360–33372.
- 7 M. A. Bryden, F. Millward, T. Matulaitis, D. Chen, M. Villa, A. Fermi, S. Cetin, P. Ceroni and E. Zysman-Colman, *J. Org. Chem.*, 2023, **88**, 6364–6373.
- 8 N. K. Katakam, C. W. Seifert, J. D’Auria and G. Li, *Heterocycles*, 2019, **99**, 604–613.
- 9 N. G. Connelly and W. E. Geiger, *Chem. Rev.*, 1996, **96**, 877–910.
- 10 V. V. Pavlishchuk and A. W. Addison, *Inorganica Chim. Acta*, 2000, **298**, 97–102.
- 11 R. Bauernschmitt and R. Ahlrichs, *Chem. Phys. Lett.*, 1996, **256**, 454–464.
- 12 C. Adamo and V. Barone, *J. Chem. Phys.*, 1999, **110**, 6158–6170.
- 13 S. Grimme, S. Ehrlich and L. Goerigk, *J. Comput. Chem.*, 2011, **32**, 1456–1465.

- 14 M. J. Frisch, J. A. Pople and J. S. Binkley, *J. Chem. Phys.*, 1984, **80**, 3265–3269.
- 15 R. Ditchfield, W. J. Hehre and J. A. Pople, *J. Chem. Phys.*, 1971, **54**, 720–723.
- 16 W. J. Hehre, K. Ditchfield and J. A. Pople, *J. Chem. Phys.*, 1972, **56**, 2257–2261.
- 17 A. D. Becke, *J. Chem. Phys.*, 1993, **98**, 5648–5652.
- 18 W. J. Stevens, M. Krauss, H. Basch and P. G. Jasien, *Can. J. Chem.*, 1992, **70**, 612–630.
- 19 D. Feller, *J. Comput. Chem.*, 1996, **17**, 1571–1586.
- 20 B. P. Pritchard, D. Altarawy, B. Didier, T. D. Gibson and T. L. Windus, *J. Chem. Inf. Model.*, 2019, **59**, 4814–4820.
- 21 K. L. Schuchardt, B. T. Didier, T. Elsethagen, L. Sun, V. Gurumoorthi, J. Chase, J. Li and T. L. Windus, *J. Chem. Inf. Model.*, 2007, **47**, 1045–1052.
- 22 T. Clark, J. Chandrasekhar, G. W. Spitznagel and P. V. R. Schleyer, *J. Comput. Chem.*, 1983, **4**, 294–301.
- 23 F. Trani, G. Scalmani, G. Zheng, I. Carnimeo, M. J. Frisch and V. Barone, *J. Chem. Theory Comput.*, 2011, **7**, 3304–3313.
- 24 S. Miertus and J. Tomasi, *Chem. Physic*, 1982, **65**, 239–245.
- 25 S. Miertus, E. Scrocco and J. Tomasi, *Chem. Phys.*, 1981, **55**, 117–129.
- 26 J. L. Pascual-ahuir, E. Silla and I. Tuñon, *J. Comput. Chem.*, 1994, **15**, 1127–1138.
- 27 M. Caricato, B. Mennucci, J. Tomasi, F. Ingrosso, R. Cammi, S. Corni and G. Scalmani, *J. Chem. Phys.*, 2006, **124**, 124520.
- 28 M. J. Frisch, G. W. Trucks, H. B. Schlegel, G. E. Scuseria, M. A. Robb, J. R. Cheeseman, G. Scalmani, V. Barone, G. A. Peterssom, H. Nakatsuji, X. Li, M. Caricato, A. V. Marenich, J. Bloino, B. G. Janesko, R. Gomperts, B. Mennucci, H. P. Hratchian, J. V. Ortiz, A. F. Izmaylov, J. L. Sonnenberg, D. Williams-Young, F.

- Ding, F. Lipparini, F. Egidi, J. Goings, B. Peng, A. Petrone, T. Henderson, D. Ranasinghe, V. G. Zakrzewski, J. Gao, N. Rega, G. Zheng, W. Liang, M. Hada, M. Ehara, K. Toyota, R. Fukuda, J. Hasegawa, M. Ishida, T. Nakajima, Y. Honda, O. Kitao, H. Nakai, T. Vreven, K. Throssell, J. A. Montgomery Jr, J. E. Peralta, F. Ogliaro, M. J. Bearpark, J. J. Heyd, E. N. Brothers, K. N. Kudin, V. N. Staroverov, T. A. Keith, R. Kobayashi, J. Normand, K. Raghavachari, A. P. Rendell, J. C. Burant, S. S. Iyengar, J. Tomasi, M. Cossi, J. M. Millam, M. Klene, C. Adamo, R. Cammi, J. W. Ochterski, R. L. Martin, K. Morokuma, O. Farkas, J. B. Foresman and D. J. Fox, 2019.
- 29 N. M. O'Boyle, A. L. Tenderholt and K. M. Langner, *J. Comput. Chem.*, 2008, **29**, 839–845.
- 30 W. Humphrey, A. Dalke and K. Schulten, *J. Mol. Graph.*, 1996, **14**, 33–38.
- 31 J. E. Stone, University of Missouri-Rolla, 1998.
- 32 J. D. Hunter, *Comput. Sci. Eng.*, 2007, **9**, 90–95.
- 33 N. M. O'Boyle, C. Morley and G. R. Hutchison, *Chem. Cent. J.*, , DOI:10.1186/1752-153X-2-5.
- 34 N. M. O'Boyle, M. Banck, C. A. James, C. Morley, T. Vandermeersch and G. R. Hutchison, *J. Cheminform.*, 2011, **3**, 239–245.
- 35 W. R. Browne, N. M. O. Boyle, J. J. Mc Garvey and J. G. Vos, *Chem. Soc. Rev.*, 2005, **34**, 641–663.
- 36 S. Lenoid, 2005–2020.
- 37 R. Dennington, T. A. Keith and J. M. Millam, 2009.
- 38 A. Juris and V. Balzani, *Helv. Chim. Acta*, 1981, **64**, 2175–2182.
- 39 M. S. Lowry, J. I. Goldsmith, J. D. Slinker, R. Rohl, R. A. Pascal, G. G. Malliaras and S. Bernhard, *Chem. Mater.*, 2005, **17**, 5712–5719.

- 40 Y. Zhang, M. Heberle, M. Wächtler, M. Karnahl and B. Dietzek, *RSC Adv.*, 2016, **6**, 105801–105805.
- 41 D. P. Hari and B. Ko, *Chem. Commun.*, 2014, **50**, 6688–6699.
- 42 E. Speckmeier, T. G. Fischer and K. Zeitler, *J. Am. Chem. Soc.*, 2018, **140**, 15353–15365.
- 43 J. Luo and J. Zhang, *ACS Catal.*, 2016, **6**, 873–877.
- 44 R. M. O'Donnell, P. G. Johansson, M. Abrahamsson and G. J. Meyer, *Inorg. Chem.*, 2013, **52**, 6839–6848.
- 45 R. Ishimatsu, S. Matsunami, T. Kasahara, J. Mizuno, T. Edura, C. Adachi, K. Nakano and T. Imato, *Angew. Chemie Int. Ed.*, 2014, **53**, 6993–6996.
- 46 S. Ladouceur, D. Fortin and E. Zysman-Colman, *Inorg. Chem.*, 2011, **50**, 11514–11526.
- 47 E. M. Arbeloa, C. M. Previtali and S. G. Bertolotti, *ChemPhysChem*, 2018, **19**, 934–942.
- 48 X. Zhang, I. Zhang and L. Liu, *Photochem. Photobiol.*, 2010, **86**, 492–498.
- 49 R. Ishimatsu, S. Matsunami, K. Shizu, C. Adachi, K. Nakano and T. Imato, *J. Phys. Chem. A*, 2013, **117**, 5607–5612.
- 50 J. Sosoe, C. Cruché, É. Morin and S. K. Collins, *Can. J. Chem.*, 2020, **98**, 461–465.
- 51 S. Grotjahn and B. König, *Org Lett*, 2021, **23**, 3146–3150.
- 52 A. Hossain, S. Engl, E. Lutsker and O. Reiser, *ACS Catal.*, 2019, **9**, 1103–1109.
- 53 C. Belger, N. M. Neisius and B. Plietker, *Chem. Eur. J.*, 2010, **16**, 12214–12220.
